# Supplementary material for: Transcriptomic Analysis of Liver Indicates Novel Vaccine to Porcine Reproductive and Respiratory Virus Promotes Homeostasis in T-Cell and Inflammatory Immune Responses Compared to a Commercial Vaccine in Pigs
Source: Front Vet Sci. 2022 Mar 24;9:791034. doi: 10.3389/fvets.2022.791034 (PMC8987227; doi:10.3389/fvets.2022.791034)
Supplement: Supplementary Table 1 — MLV-129p-IFNmix differentially expressed gene list. [file Table_1.XLSX]

## Sheet:  MLV-129pIFNmix vs sham-prrsv
GENE	LOG2FC	FDR (B&H)
ENSSSCG00000020402	0.844899	1.71664e-06
ENSSSCG00000033996	-1.48625	1.71664e-06
ENSSSCG00000013579	1.44142	4.68072e-06
ENSSSCG00000003848	-0.594473	2.4342e-05
ENSSSCG00000022649	-0.932656	3.42708e-05
ENSSSCG00000017258	1.11467	4.83728e-05
ENSSSCG00000006183	1.17928	5.51314e-05
ENSSSCG00000007146	1.21217	5.90556e-05
ENSSSCG00000038521	-1.19712	6.52806e-05
ENSSSCG00000024742	-1.2727	8.11609e-05
ENSSSCG00000046134	1.25218	8.11609e-05
ENSSSCG00000001137	-1.04851	0.000126779
ENSSSCG00000035170	1.18678	0.000255592
ENSSSCG00000040275	0.986837	0.000255592
ENSSSCG00000029438	-0.974599	0.000614801
ENSSSCG00000023014	1.05378	0.000829838
ENSSSCG00000049143	-1.13773	0.000890362
ENSSSCG00000032846	0.532736	0.000996319
ENSSSCG00000015662	1.13534	0.0010196
ENSSSCG00000038706	0.918281	0.00125938
ENSSSCG00000031640	0.885942	0.00127653
ENSSSCG00000017956	0.91176	0.00164366
ENSSSCG00000044280	0.911096	0.00171704
ENSSSCG00000028691	1.053	0.00233031
ENSSSCG00000015340	-0.551488	0.00279737
ENSSSCG00000037051	-1.06432	0.0031072
ENSSSCG00000005287	-1.06228	0.00314414
ENSSSCG00000021977	0.592291	0.00314414
ENSSSCG00000002652	-0.428786	0.00314414
ENSSSCG00000015412	1.06105	0.00314414
ENSSSCG00000006979	1.00071	0.00314414
ENSSSCG00000040607	0.636188	0.00408687
ENSSSCG00000027157	0.984921	0.00408687
ENSSSCG00000039862	-0.997611	0.00408687
ENSSSCG00000002868	0.675265	0.00522489
ENSSSCG00000032282	0.857075	0.00532081
ENSSSCG00000039770	-0.685007	0.00601583
ENSSSCG00000029371	0.643061	0.00601583
ENSSSCG00000006717	-0.937491	0.00601583
ENSSSCG00000031751	-1.01039	0.00601583
ENSSSCG00000021724	0.938308	0.00638355
ENSSSCG00000002516	-0.634989	0.00692688
ENSSSCG00000000660	1.00387	0.00697457
ENSSSCG00000018672	-0.975723	0.00699269
ENSSSCG00000037762	0.943459	0.00699269
ENSSSCG00000009202	0.879701	0.00709251
ENSSSCG00000045321	-0.951849	0.0073104
ENSSSCG00000009238	-0.437457	0.00746596
ENSSSCG00000000549	0.634989	0.00746596
ENSSSCG00000002847	-0.97906	0.00791685
ENSSSCG00000016677	-0.673963	0.00791685
ENSSSCG00000016817	-0.625238	0.00808572
ENSSSCG00000008068	-0.425131	0.00863532
ENSSSCG00000035839	-0.445286	0.00889328
ENSSSCG00000050815	0.919809	0.00894625
ENSSSCG00000050110	-0.943548	0.00910638
ENSSSCG00000002464	0.886484	0.00910638
ENSSSCG00000016002	0.881268	0.0107196
ENSSSCG00000040016	0.723758	0.0123667
ENSSSCG00000011690	0.758426	0.0125468
ENSSSCG00000025243	0.646842	0.0125468
ENSSSCG00000013389	0.879208	0.0125468
ENSSSCG00000000857	0.896234	0.0125468
ENSSSCG00000032436	0.889908	0.0131654
ENSSSCG00000041847	0.940076	0.0134271
ENSSSCG00000023746	0.846718	0.0134271
ENSSSCG00000011713	0.767472	0.0137442
ENSSSCG00000024015	-0.835402	0.0142571
ENSSSCG00000042668	0.922012	0.0142571
ENSSSCG00000004779	-0.752014	0.0142854
ENSSSCG00000012300	-0.875471	0.0142854
ENSSSCG00000016857	0.722562	0.0142854
ENSSSCG00000007058	0.571656	0.0142854
ENSSSCG00000019768	-0.931429	0.0147952
ENSSSCG00000010604	0.577118	0.0156265
ENSSSCG00000015426	0.772361	0.0158987
ENSSSCG00000004145	0.679848	0.0189042
ENSSSCG00000011277	0.898608	0.0202327
ENSSSCG00000037026	-0.885822	0.0205895
ENSSSCG00000032769	-0.901771	0.0214104
ENSSSCG00000021060	-0.529748	0.0214104
ENSSSCG00000005257	0.774785	0.022483
ENSSSCG00000010948	0.894974	0.022483
ENSSSCG00000034973	0.62782	0.0232089
ENSSSCG00000005713	-0.842307	0.0241068
ENSSSCG00000007248	-0.366188	0.0241068
ENSSSCG00000007469	-0.308089	0.0261174
ENSSSCG00000040956	0.769728	0.027669
ENSSSCG00000032126	-0.773696	0.027669
ENSSSCG00000047868	-0.876409	0.027669
ENSSSCG00000009535	0.585975	0.0292474
ENSSSCG00000016230	-0.577979	0.0292493
ENSSSCG00000035089	-0.807422	0.0294662
ENSSSCG00000022230	0.596771	0.0315498
ENSSSCG00000000663	0.769846	0.0321006
ENSSSCG00000031106	-0.608209	0.0331529
ENSSSCG00000036050	0.543701	0.0331529
ENSSSCG00000014921	0.75617	0.034069
ENSSSCG00000011579	0.763901	0.0360446
ENSSSCG00000041103	-0.567902	0.0360446
ENSSSCG00000008230	0.737611	0.0360446
ENSSSCG00000036600	-0.86235	0.0360446
ENSSSCG00000043613	0.730689	0.0362907
ENSSSCG00000036669	0.569408	0.0365756
ENSSSCG00000007189	0.750583	0.0368828
ENSSSCG00000003278	0.826848	0.0368913
ENSSSCG00000039867	-0.477884	0.0418788
ENSSSCG00000000504	0.565804	0.0418788
ENSSSCG00000038801	0.715792	0.0438323
ENSSSCG00000040461	0.7867	0.0443269
ENSSSCG00000010836	0.569614	0.0474526
ENSSSCG00000011020	0.642671	0.0474526
ENSSSCG00000004596	0.747076	0.0481846
ENSSSCG00000014224	0.652695	0.0487212
ENSSSCG00000036144	0.812791	0.0492466
ENSSSCG00000051156	0.791713	0.0509798
ENSSSCG00000004092	-0.661119	0.0522049
ENSSSCG00000006031	0.829619	0.0526479
ENSSSCG00000023498	0.812983	0.0535835
ENSSSCG00000006893	0.429514	0.0535835
ENSSSCG00000001061	-0.365771	0.0535835
ENSSSCG00000001950	-0.294625	0.0535835
ENSSSCG00000009468	0.55498	0.0535835
ENSSSCG00000023328	0.567472	0.0546192
ENSSSCG00000049288	0.785936	0.0562813
ENSSSCG00000036618	0.723428	0.0586208
ENSSSCG00000033199	0.812553	0.0591589
ENSSSCG00000016279	0.351301	0.0591589
ENSSSCG00000007642	0.813291	0.0591589
ENSSSCG00000025986	-0.726934	0.0624039
ENSSSCG00000003690	0.698425	0.0631133
ENSSSCG00000032674	-0.725955	0.0638394
ENSSSCG00000012828	0.66982	0.0654124
ENSSSCG00000026893	0.551668	0.0673756
ENSSSCG00000003187	0.481988	0.06936
ENSSSCG00000006143	0.512112	0.0711776
ENSSSCG00000041954	-0.675894	0.0722417
ENSSSCG00000039412	0.728621	0.0722417
ENSSSCG00000001459	0.733526	0.0733635
ENSSSCG00000050009	-0.753886	0.0746495
ENSSSCG00000011609	0.791451	0.0751033
ENSSSCG00000003973	-0.57593	0.0751033
ENSSSCG00000038138	-0.607872	0.0751033
ENSSSCG00000011208	0.605696	0.0772593
ENSSSCG00000016005	0.594825	0.0796767
ENSSSCG00000027302	-0.78766	0.0802668
ENSSSCG00000009543	-0.702695	0.0817482
ENSSSCG00000015556	0.633783	0.0823153
ENSSSCG00000000688	-0.757921	0.0825881
ENSSSCG00000035456	-0.702639	0.0825881
ENSSSCG00000010926	0.733609	0.0833476
ENSSSCG00000003998	-0.412233	0.083809
ENSSSCG00000037251	0.47237	0.083809
ENSSSCG00000010959	0.645188	0.083809
ENSSSCG00000010757	0.532671	0.0848566
ENSSSCG00000007748	-0.767967	0.0848566
ENSSSCG00000002032	0.684319	0.0848566
ENSSSCG00000033919	-0.474811	0.0848566
ENSSSCG00000028855	-0.320079	0.0880433
ENSSSCG00000025206	-0.382495	0.0887768
ENSSSCG00000041050	0.67499	0.0887768
ENSSSCG00000038933	0.472085	0.0887768
ENSSSCG00000015413	0.562107	0.0887768
ENSSSCG00000006463	0.522386	0.0887768
ENSSSCG00000004939	0.664956	0.0907859
ENSSSCG00000005103	-0.567607	0.0907859
ENSSSCG00000010574	0.766149	0.0907859
ENSSSCG00000010160	-0.313965	0.0907859
ENSSSCG00000015716	0.733953	0.0907859
ENSSSCG00000035058	0.664648	0.0907859
ENSSSCG00000050256	-0.540773	0.0907859
ENSSSCG00000049262	-0.76484	0.0907859
ENSSSCG00000001131	0.678037	0.0907859
ENSSSCG00000029249	-0.479158	0.0907859
ENSSSCG00000007501	-0.761858	0.0907859
ENSSSCG00000042532	0.663664	0.0916732
ENSSSCG00000002681	0.597772	0.0916732
ENSSSCG00000009194	0.736128	0.0916732
ENSSSCG00000009217	0.413986	0.0916732
ENSSSCG00000050251	0.56785	0.0916732
ENSSSCG00000040829	-0.613884	0.0916732
ENSSSCG00000039745	0.751111	0.0916732
ENSSSCG00000004918	-0.468911	0.093821
ENSSSCG00000005994	-0.369039	0.0970328
ENSSSCG00000039841	0.692939	0.0975847
ENSSSCG00000015747	0.688204	0.0983619
ENSSSCG00000015268	0.736626	0.0983619
ENSSSCG00000015271	0.706722	0.0983619
ENSSSCG00000006455	0.737333	0.0983619
ENSSSCG00000027070	-0.622109	0.0983619
ENSSSCG00000037016	0.672	0.0983619
ENSSSCG00000034558	-0.664883	0.0983619
ENSSSCG00000006743	-0.453752	0.100706
ENSSSCG00000026453	0.755871	0.100825
ENSSSCG00000038719	0.487105	0.100881
ENSSSCG00000022569	0.710267	0.101149
ENSSSCG00000015730	-0.446587	0.103884
ENSSSCG00000010494	0.515892	0.105673
ENSSSCG00000012857	-0.579087	0.108318
ENSSSCG00000034598	-0.748584	0.108318
ENSSSCG00000005009	0.530165	0.108977
ENSSSCG00000004795	0.488155	0.110322
ENSSSCG00000037200	-0.668529	0.11125
ENSSSCG00000021208	0.503318	0.11125
ENSSSCG00000036469	-0.669925	0.112305
ENSSSCG00000002815	0.646429	0.112961
ENSSSCG00000038708	-0.369703	0.112961
ENSSSCG00000017010	0.648972	0.11371
ENSSSCG00000011443	0.660943	0.114116
ENSSSCG00000045095	0.673885	0.114116
ENSSSCG00000008769	0.652673	0.114116
ENSSSCG00000021229	0.37152	0.114116
ENSSSCG00000021138	-0.338605	0.114116
ENSSSCG00000022575	0.56681	0.114116
ENSSSCG00000029227	0.502234	0.114682
ENSSSCG00000051070	-0.738965	0.115473
ENSSSCG00000036208	-0.647498	0.115473
ENSSSCG00000021557	0.642022	0.115863
ENSSSCG00000031348	0.39839	0.117196
ENSSSCG00000040715	0.73399	0.118276
ENSSSCG00000018461	-0.68288	0.119332
ENSSSCG00000026618	0.673974	0.119585
ENSSSCG00000008972	-0.669138	0.119585
ENSSSCG00000034827	0.581332	0.119585
ENSSSCG00000017577	0.711921	0.119585
ENSSSCG00000029494	0.586135	0.12067
ENSSSCG00000016401	-0.727362	0.121902
ENSSSCG00000039272	0.707791	0.121902
ENSSSCG00000004057	-0.3853	0.12227
ENSSSCG00000028372	0.662465	0.12227
ENSSSCG00000014011	-0.722677	0.12227
ENSSSCG00000017256	0.694366	0.12227
ENSSSCG00000030222	-0.408914	0.122939
ENSSSCG00000038351	-0.685374	0.124894
ENSSSCG00000015830	0.702817	0.124894
ENSSSCG00000024975	0.479627	0.124894
ENSSSCG00000011933	0.433267	0.12498
ENSSSCG00000040944	-0.633535	0.125322
ENSSSCG00000032996	-0.618842	0.125322
ENSSSCG00000007816	-0.298218	0.125322
ENSSSCG00000033512	0.694361	0.127515
ENSSSCG00000045831	0.668148	0.128804
ENSSSCG00000044235	0.67818	0.1298
ENSSSCG00000021271	-0.720898	0.131412
ENSSSCG00000037508	0.458006	0.133513
ENSSSCG00000045382	0.657894	0.134372
ENSSSCG00000015444	0.537559	0.135853
ENSSSCG00000003983	-0.282611	0.136742
ENSSSCG00000037898	0.505338	0.136742
ENSSSCG00000000734	0.583864	0.136742
ENSSSCG00000029602	-0.358542	0.139296
ENSSSCG00000015862	0.49034	0.143979
ENSSSCG00000012262	-0.511516	0.143979
ENSSSCG00000002433	0.523563	0.143979
ENSSSCG00000023715	0.456348	0.143979
ENSSSCG00000014369	0.679496	0.144385
ENSSSCG00000031595	-0.698305	0.144385
ENSSSCG00000001554	-0.26942	0.144734
ENSSSCG00000003331	-0.707012	0.150364
ENSSSCG00000009477	0.618095	0.151179
ENSSSCG00000035969	0.481596	0.151179
ENSSSCG00000042146	0.699135	0.151536
ENSSSCG00000025795	-0.695973	0.152266
ENSSSCG00000021698	-0.444918	0.152542
ENSSSCG00000005503	0.576515	0.155307
ENSSSCG00000027550	0.702091	0.155307
ENSSSCG00000009692	-0.323573	0.155307
ENSSSCG00000006488	0.638855	0.155307
ENSSSCG00000051231	-0.670847	0.155307
ENSSSCG00000017422	-0.619945	0.155307
ENSSSCG00000009519	-0.408101	0.158133
ENSSSCG00000047796	0.638559	0.158345
ENSSSCG00000005083	0.546051	0.158662
ENSSSCG00000025463	0.542457	0.158662
ENSSSCG00000007281	0.658128	0.158662
ENSSSCG00000048322	-0.488426	0.159975
ENSSSCG00000001787	0.402477	0.160151
ENSSSCG00000012525	-0.694305	0.160611
ENSSSCG00000013020	-0.512241	0.160612
ENSSSCG00000010253	-0.348545	0.160612
ENSSSCG00000009040	0.43668	0.160612
ENSSSCG00000016665	0.443323	0.160612
ENSSSCG00000028359	0.694176	0.161106
ENSSSCG00000028239	0.486253	0.161195
ENSSSCG00000038202	-0.477393	0.161278
ENSSSCG00000003789	0.670592	0.161441
ENSSSCG00000051374	0.548593	0.161441
ENSSSCG00000009164	0.464594	0.161818
ENSSSCG00000000999	-0.462776	0.161818
ENSSSCG00000022915	-0.365256	0.161818
ENSSSCG00000039012	0.462528	0.162219
ENSSSCG00000015784	-0.378642	0.162219
ENSSSCG00000003081	0.620266	0.162233
ENSSSCG00000004612	-0.363039	0.162582
ENSSSCG00000011822	-0.276967	0.162582
ENSSSCG00000014007	0.674181	0.162582
ENSSSCG00000036723	0.624301	0.16673
ENSSSCG00000022236	0.560948	0.169028
ENSSSCG00000034572	-0.349647	0.169214
ENSSSCG00000029281	0.552988	0.169214
ENSSSCG00000023279	0.648084	0.173812
ENSSSCG00000050813	0.466216	0.175279
ENSSSCG00000016941	0.446186	0.176429
ENSSSCG00000005096	-0.250357	0.178671
ENSSSCG00000007067	0.495096	0.180019
ENSSSCG00000004166	-0.410531	0.180422
ENSSSCG00000048240	-0.442475	0.181469
ENSSSCG00000004713	0.606872	0.181469
ENSSSCG00000011133	-0.328463	0.181469
ENSSSCG00000002540	-0.311222	0.181469
ENSSSCG00000040713	-0.512547	0.181757
ENSSSCG00000043906	-0.615963	0.181757
ENSSSCG00000022301	-0.460215	0.181881
ENSSSCG00000008468	0.457761	0.181881
ENSSSCG00000027778	0.373252	0.181881
ENSSSCG00000005249	0.618123	0.186897
ENSSSCG00000037449	0.608058	0.186897
ENSSSCG00000025582	0.570863	0.186897
ENSSSCG00000051291	0.664641	0.186897
ENSSSCG00000010654	0.502211	0.189221
ENSSSCG00000002267	0.559119	0.189221
ENSSSCG00000002447	-0.336566	0.193478
ENSSSCG00000031630	-0.604135	0.194539
ENSSSCG00000010380	-0.372014	0.19494
ENSSSCG00000013307	0.617844	0.196484
ENSSSCG00000028740	0.465508	0.1974
ENSSSCG00000024158	0.59471	0.1974
ENSSSCG00000006887	0.46216	0.200535
ENSSSCG00000006162	0.408742	0.200535
ENSSSCG00000028983	-0.276487	0.201197
ENSSSCG00000023785	-0.371375	0.201197
ENSSSCG00000037430	0.654785	0.20287
ENSSSCG00000009083	0.513316	0.20287
ENSSSCG00000050854	0.585272	0.20287
ENSSSCG00000039009	-0.575297	0.206362
ENSSSCG00000006391	0.611307	0.206362
ENSSSCG00000006197	-0.471939	0.207699
ENSSSCG00000014094	-0.264613	0.207914
ENSSSCG00000016233	0.500664	0.207914
ENSSSCG00000004154	0.358624	0.210091
ENSSSCG00000000418	0.615827	0.217102
ENSSSCG00000038872	-0.300514	0.217225
ENSSSCG00000010219	-0.255787	0.217309
ENSSSCG00000037288	-0.611812	0.217309
ENSSSCG00000001049	-0.255779	0.217309
ENSSSCG00000040594	0.656062	0.222299
ENSSSCG00000030369	-0.32659	0.225057
ENSSSCG00000000791	0.591296	0.225057
ENSSSCG00000014411	-0.339761	0.225072
ENSSSCG00000027434	0.581691	0.225072
ENSSSCG00000032896	0.630189	0.225072
ENSSSCG00000032408	0.377271	0.225165
ENSSSCG00000004149	0.439648	0.225761
ENSSSCG00000011635	-0.648148	0.226231
ENSSSCG00000016929	0.351583	0.227217
ENSSSCG00000015632	0.640768	0.227521
ENSSSCG00000032423	0.652003	0.227902
ENSSSCG00000041287	0.636767	0.227902
ENSSSCG00000000854	0.580695	0.227902
ENSSSCG00000035581	0.317299	0.227902
ENSSSCG00000031536	0.506819	0.229643
ENSSSCG00000049638	-0.602029	0.229832
ENSSSCG00000047968	0.534577	0.229832
ENSSSCG00000035414	-0.347222	0.229832
ENSSSCG00000039514	0.525014	0.229832
ENSSSCG00000009748	-0.604856	0.229832
ENSSSCG00000034723	-0.588457	0.229832
ENSSSCG00000031988	0.632538	0.229832
ENSSSCG00000032591	0.53392	0.230019
ENSSSCG00000009676	0.34676	0.230019
ENSSSCG00000015526	0.611403	0.230019
ENSSSCG00000024960	0.430951	0.230019
ENSSSCG00000036924	-0.311531	0.230019
ENSSSCG00000034632	-0.611098	0.230019
ENSSSCG00000009364	0.632404	0.230019
ENSSSCG00000047315	0.510565	0.233711
ENSSSCG00000023760	0.454021	0.233711
ENSSSCG00000025981	-0.588119	0.236237
ENSSSCG00000005641	0.529565	0.236906
ENSSSCG00000001822	-0.54777	0.236906
ENSSSCG00000033185	0.403698	0.237295
ENSSSCG00000013551	-0.460223	0.239102
ENSSSCG00000034259	0.479729	0.2395
ENSSSCG00000006970	0.461695	0.241432
ENSSSCG00000011970	-0.239979	0.241568
ENSSSCG00000026092	-0.334103	0.241568
ENSSSCG00000038062	-0.385675	0.241627
ENSSSCG00000001507	-0.381967	0.242076
ENSSSCG00000011683	0.464617	0.245774
ENSSSCG00000004233	0.636445	0.249732
ENSSSCG00000031576	0.514631	0.249732
ENSSSCG00000024614	0.463281	0.249732
ENSSSCG00000028802	-0.610211	0.249732
ENSSSCG00000044676	0.558508	0.249732
ENSSSCG00000009753	0.59889	0.250731
ENSSSCG00000015037	0.497061	0.250731
ENSSSCG00000015815	0.437011	0.251195
ENSSSCG00000017778	-0.570271	0.251195
ENSSSCG00000051232	0.485118	0.252865
ENSSSCG00000015405	0.54672	0.252865
ENSSSCG00000041013	-0.609086	0.256506
ENSSSCG00000031904	0.600088	0.256506
ENSSSCG00000037351	0.593088	0.2572
ENSSSCG00000034105	0.383403	0.2572
ENSSSCG00000009268	-0.254188	0.2572
ENSSSCG00000008465	-0.62166	0.260936
ENSSSCG00000012027	0.55563	0.261453
ENSSSCG00000028965	-0.612875	0.262928
ENSSSCG00000032053	0.631314	0.263676
ENSSSCG00000047883	-0.626753	0.263902
ENSSSCG00000007391	0.587946	0.263902
ENSSSCG00000048519	0.629598	0.264721
ENSSSCG00000013033	-0.501031	0.264721
ENSSSCG00000000696	-0.431939	0.264721
ENSSSCG00000007083	0.609994	0.264721
ENSSSCG00000004830	-0.457678	0.265808
ENSSSCG00000004484	0.488434	0.265808
ENSSSCG00000039426	0.479322	0.265808
ENSSSCG00000003386	0.480589	0.265808
ENSSSCG00000016226	-0.332189	0.265808
ENSSSCG00000031698	-0.599003	0.265808
ENSSSCG00000049005	0.567809	0.265808
ENSSSCG00000036480	0.546799	0.265956
ENSSSCG00000041258	-0.607792	0.265992
ENSSSCG00000000837	-0.286087	0.265992
ENSSSCG00000009839	-0.38909	0.266352
ENSSSCG00000002506	-0.317043	0.2672
ENSSSCG00000037565	-0.623327	0.270716
ENSSSCG00000013248	0.623035	0.271757
ENSSSCG00000009011	0.481427	0.271757
ENSSSCG00000005030	0.508638	0.273837
ENSSSCG00000023243	0.251516	0.274311
ENSSSCG00000039695	0.544982	0.274311
ENSSSCG00000000707	0.61843	0.274578
ENSSSCG00000005590	-0.242941	0.275005
ENSSSCG00000045523	0.585892	0.275005
ENSSSCG00000015244	0.36293	0.275005
ENSSSCG00000051601	0.417165	0.275975
ENSSSCG00000024777	-0.393173	0.275975
ENSSSCG00000011928	0.446673	0.277966
ENSSSCG00000028327	0.423896	0.277981
ENSSSCG00000008965	0.554173	0.277981
ENSSSCG00000022676	0.429056	0.277981
ENSSSCG00000043061	-0.614991	0.278345
ENSSSCG00000026402	0.617252	0.278345
ENSSSCG00000038534	-0.325702	0.278345
ENSSSCG00000034122	0.511741	0.278424
ENSSSCG00000003854	0.480047	0.279299
ENSSSCG00000000869	-0.25614	0.279299
ENSSSCG00000038681	-0.500174	0.279848
ENSSSCG00000006788	0.470297	0.28115
ENSSSCG00000004390	0.288586	0.281737
ENSSSCG00000024111	-0.606786	0.281737
ENSSSCG00000012840	0.528925	0.281737
ENSSSCG00000048343	-0.572343	0.281737
ENSSSCG00000000559	0.314252	0.281737
ENSSSCG00000009542	-0.368833	0.281737
ENSSSCG00000047748	0.552022	0.281737
ENSSSCG00000038256	-0.58221	0.281737
ENSSSCG00000023611	0.593002	0.282002
ENSSSCG00000028942	0.564393	0.282149
ENSSSCG00000005502	0.552823	0.283719
ENSSSCG00000020696	0.509208	0.284805
ENSSSCG00000034223	-0.563315	0.288142
ENSSSCG00000026590	-0.530084	0.28817
ENSSSCG00000035750	0.369764	0.289996
ENSSSCG00000001801	-0.394915	0.293204
ENSSSCG00000000982	-0.598665	0.295238
ENSSSCG00000024970	-0.390005	0.295476
ENSSSCG00000031789	-0.226488	0.296056
ENSSSCG00000038081	-0.231631	0.296147
ENSSSCG00000000413	-0.588331	0.2975
ENSSSCG00000042835	0.562259	0.297754
ENSSSCG00000016096	0.33276	0.297754
ENSSSCG00000016784	0.337921	0.297754
ENSSSCG00000039107	-0.432416	0.298472
ENSSSCG00000039538	-0.562056	0.299252
ENSSSCG00000004980	0.388298	0.300455
ENSSSCG00000025777	0.506344	0.301786
ENSSSCG00000049314	-0.587311	0.301906
ENSSSCG00000036152	0.475485	0.302398
ENSSSCG00000047811	0.591421	0.302398
ENSSSCG00000017643	0.456793	0.30299
ENSSSCG00000051274	-0.606602	0.303033
ENSSSCG00000029538	-0.315507	0.303886
ENSSSCG00000006337	-0.326444	0.305418
ENSSSCG00000040418	0.599881	0.307331
ENSSSCG00000003384	-0.315216	0.307331
ENSSSCG00000002723	-0.443945	0.307331
ENSSSCG00000014450	-0.293711	0.307331
ENSSSCG00000029096	0.461844	0.307331
ENSSSCG00000010584	-0.58406	0.307331
ENSSSCG00000015814	-0.567104	0.307331
ENSSSCG00000029189	-0.591669	0.307331
ENSSSCG00000041116	0.593395	0.307331
ENSSSCG00000012685	-0.320863	0.307331
ENSSSCG00000012479	0.479996	0.307331
ENSSSCG00000000457	-0.215227	0.307331
ENSSSCG00000000077	-0.42627	0.307331
ENSSSCG00000000107	-0.355863	0.307331
ENSSSCG00000049837	-0.495875	0.307331
ENSSSCG00000027882	0.545962	0.307331
ENSSSCG00000017983	0.555375	0.307331
ENSSSCG00000050966	-0.363216	0.307569
ENSSSCG00000000573	0.514339	0.307569
ENSSSCG00000024152	-0.258298	0.307569
ENSSSCG00000017249	0.499436	0.307569
ENSSSCG00000003986	-0.541532	0.307687
ENSSSCG00000014851	0.371582	0.307687
ENSSSCG00000002009	-0.577827	0.307687
ENSSSCG00000036702	-0.396344	0.307687
ENSSSCG00000048222	-0.568882	0.307687
ENSSSCG00000009403	0.377828	0.307687
ENSSSCG00000034964	-0.240797	0.307687
ENSSSCG00000007073	0.511202	0.30831
ENSSSCG00000035400	0.381754	0.308572
ENSSSCG00000036758	0.540968	0.310048
ENSSSCG00000022467	-0.523492	0.310602
ENSSSCG00000023666	0.38995	0.310627
ENSSSCG00000024633	0.589908	0.310627
ENSSSCG00000006376	0.504173	0.310717
ENSSSCG00000040887	-0.253968	0.311653
ENSSSCG00000021647	0.506527	0.311653
ENSSSCG00000032444	0.352324	0.311837
ENSSSCG00000040631	0.596527	0.312265
ENSSSCG00000008250	0.510758	0.312265
ENSSSCG00000004948	0.456223	0.313619
ENSSSCG00000004507	0.391454	0.313619
ENSSSCG00000033307	-0.543466	0.313619
ENSSSCG00000006060	0.522715	0.313619
ENSSSCG00000012362	0.447157	0.313619
ENSSSCG00000000541	0.371201	0.313619
ENSSSCG00000036444	-0.517788	0.313619
ENSSSCG00000042951	-0.56236	0.314041
ENSSSCG00000032668	-0.432712	0.314497
ENSSSCG00000036352	0.53582	0.314497
ENSSSCG00000040397	0.364122	0.317096
ENSSSCG00000039797	0.589875	0.319311
ENSSSCG00000003772	-0.223936	0.319311
ENSSSCG00000010187	0.301645	0.319311
ENSSSCG00000042312	-0.570367	0.319321
ENSSSCG00000021973	0.521155	0.319321
ENSSSCG00000007435	0.491549	0.319321
ENSSSCG00000004314	0.444835	0.32026
ENSSSCG00000041392	0.442139	0.32026
ENSSSCG00000039089	0.565778	0.32026
ENSSSCG00000017518	-0.554428	0.32026
ENSSSCG00000000737	0.51217	0.321361
ENSSSCG00000013760	-0.52418	0.32269
ENSSSCG00000050255	0.576645	0.32269
ENSSSCG00000039991	-0.327798	0.32269
ENSSSCG00000010650	0.553004	0.32329
ENSSSCG00000032835	0.24013	0.323608
ENSSSCG00000004203	-0.306282	0.323608
ENSSSCG00000030246	0.537874	0.323608
ENSSSCG00000006835	-0.442424	0.323608
ENSSSCG00000000456	0.463087	0.323608
ENSSSCG00000017197	-0.577655	0.323608
ENSSSCG00000017380	0.57771	0.323608
ENSSSCG00000012022	0.360669	0.326276
ENSSSCG00000010011	0.474006	0.326818
ENSSSCG00000005284	0.468765	0.327249
ENSSSCG00000036033	0.429764	0.327249
ENSSSCG00000002366	0.411348	0.327249
ENSSSCG00000017507	-0.530012	0.327249
ENSSSCG00000002528	0.426392	0.327249
ENSSSCG00000003809	-0.212457	0.327837
ENSSSCG00000041382	0.585775	0.329174
ENSSSCG00000028978	-0.513244	0.329174
ENSSSCG00000006481	-0.352146	0.329174
ENSSSCG00000002746	-0.544961	0.329238
ENSSSCG00000013599	0.523848	0.329238
ENSSSCG00000017355	0.3731	0.33011
ENSSSCG00000027506	-0.401496	0.330666
ENSSSCG00000014255	-0.30732	0.332923
ENSSSCG00000047073	-0.370622	0.335603
ENSSSCG00000049906	-0.569644	0.335905
ENSSSCG00000006083	0.36509	0.335905
ENSSSCG00000013745	-0.374845	0.336304
ENSSSCG00000037918	0.528488	0.336304
ENSSSCG00000006397	-0.567031	0.336304
ENSSSCG00000040945	0.428787	0.336304
ENSSSCG00000037426	-0.561271	0.337874
ENSSSCG00000045726	0.490474	0.338222
ENSSSCG00000034730	-0.354043	0.338304
ENSSSCG00000007239	0.569372	0.338304
ENSSSCG00000032398	0.553662	0.340149
ENSSSCG00000034738	-0.525052	0.34203
ENSSSCG00000038886	0.417092	0.344154
ENSSSCG00000006848	0.389859	0.344601
ENSSSCG00000014628	0.558981	0.349054
ENSSSCG00000011131	-0.361519	0.349054
ENSSSCG00000015034	0.369052	0.350472
ENSSSCG00000014204	-0.293914	0.351483
ENSSSCG00000039568	0.564138	0.351919
ENSSSCG00000049430	-0.543957	0.353226
ENSSSCG00000004023	-0.351409	0.353411
ENSSSCG00000031201	0.575413	0.355615
ENSSSCG00000004290	0.553578	0.357145
ENSSSCG00000016512	-0.246586	0.357145
ENSSSCG00000033179	0.574791	0.357145
ENSSSCG00000024492	0.552258	0.357218
ENSSSCG00000003905	-0.451507	0.357218
ENSSSCG00000003702	0.436475	0.357218
ENSSSCG00000012914	-0.515516	0.357218
ENSSSCG00000014149	0.288047	0.357218
ENSSSCG00000010672	0.224445	0.357218
ENSSSCG00000014876	0.531269	0.357218
ENSSSCG00000032693	0.547471	0.357218
ENSSSCG00000017268	-0.318638	0.357218
ENSSSCG00000008913	0.343076	0.358413
ENSSSCG00000022692	-0.346442	0.358643
ENSSSCG00000014213	0.566971	0.359517
ENSSSCG00000024293	0.569894	0.359517
ENSSSCG00000006735	0.46677	0.359517
ENSSSCG00000051689	-0.5166	0.359517
ENSSSCG00000033146	0.561397	0.359517
ENSSSCG00000016841	-0.46746	0.359517
ENSSSCG00000017118	-0.571239	0.359517
ENSSSCG00000046155	0.486644	0.359517
ENSSSCG00000041187	0.560613	0.359517
ENSSSCG00000011038	0.554659	0.359517
ENSSSCG00000014235	0.421014	0.35986
ENSSSCG00000017062	0.570869	0.359876
ENSSSCG00000009499	0.474881	0.359876
ENSSSCG00000042331	0.536822	0.360268
ENSSSCG00000050466	-0.454435	0.364597
ENSSSCG00000035987	0.568929	0.36603
ENSSSCG00000015826	0.436424	0.366063
ENSSSCG00000040087	0.320396	0.366949
ENSSSCG00000024396	-0.300701	0.366949
ENSSSCG00000023078	-0.541266	0.367441
ENSSSCG00000014338	-0.412967	0.367441
ENSSSCG00000034495	0.565724	0.367441
ENSSSCG00000002444	0.514831	0.367441
ENSSSCG00000000864	0.429777	0.367441
ENSSSCG00000046895	0.515129	0.36794
ENSSSCG00000011672	-0.159529	0.36794
ENSSSCG00000041649	-0.564409	0.368384
ENSSSCG00000018034	-0.500694	0.368631
ENSSSCG00000013393	0.502769	0.369673
ENSSSCG00000004602	0.33849	0.371196
ENSSSCG00000003088	0.447013	0.37122
ENSSSCG00000027669	0.471208	0.37122
ENSSSCG00000017752	0.316915	0.37122
ENSSSCG00000024983	-0.296766	0.372503
ENSSSCG00000002805	0.373975	0.372503
ENSSSCG00000031741	-0.450115	0.372503
ENSSSCG00000027551	-0.512796	0.372503
ENSSSCG00000031946	0.525233	0.372503
ENSSSCG00000004053	-0.410785	0.373461
ENSSSCG00000004167	-0.384433	0.373461
ENSSSCG00000022039	0.526714	0.373461
ENSSSCG00000036996	0.538424	0.373461
ENSSSCG00000038918	0.49583	0.373461
ENSSSCG00000013102	0.544499	0.373461
ENSSSCG00000032852	0.540118	0.373461
ENSSSCG00000009876	-0.310956	0.373461
ENSSSCG00000023255	-0.563443	0.373461
ENSSSCG00000044602	0.551204	0.373461
ENSSSCG00000049043	0.535312	0.373461
ENSSSCG00000010840	0.525073	0.373461
ENSSSCG00000017492	0.387913	0.373461
ENSSSCG00000017257	0.489836	0.375272
ENSSSCG00000042901	-0.559095	0.378295
ENSSSCG00000030660	0.485066	0.378801
ENSSSCG00000026953	0.427429	0.378801
ENSSSCG00000024671	0.55656	0.378801
ENSSSCG00000013360	0.417439	0.378801
ENSSSCG00000012843	-0.546616	0.378801
ENSSSCG00000030435	-0.317011	0.378801
ENSSSCG00000039874	0.556884	0.378801
ENSSSCG00000006542	-0.495941	0.378801
ENSSSCG00000012811	-0.264564	0.378801
ENSSSCG00000026742	0.33912	0.378801
ENSSSCG00000001197	-0.557937	0.378801
ENSSSCG00000033171	0.553255	0.378801
ENSSSCG00000000075	-0.264523	0.378801
ENSSSCG00000009380	-0.557652	0.378801
ENSSSCG00000017273	-0.302898	0.378801
ENSSSCG00000044150	0.525036	0.378801
ENSSSCG00000016773	-0.398412	0.378801
ENSSSCG00000003259	-0.55736	0.379485
ENSSSCG00000006059	-0.309984	0.379485
ENSSSCG00000016122	-0.494692	0.379926
ENSSSCG00000010052	0.459115	0.380872
ENSSSCG00000017184	-0.421457	0.3838
ENSSSCG00000044476	0.538873	0.384912
ENSSSCG00000005455	0.493747	0.384935
ENSSSCG00000002427	0.529336	0.385032
ENSSSCG00000031794	0.54671	0.386954
ENSSSCG00000008396	0.409183	0.386954
ENSSSCG00000007565	0.520709	0.386954
ENSSSCG00000012135	0.538678	0.386954
ENSSSCG00000020701	0.454194	0.386954
ENSSSCG00000015334	0.529574	0.387065
ENSSSCG00000035473	-0.553479	0.387065
ENSSSCG00000022429	-0.522348	0.387573
ENSSSCG00000011194	-0.235959	0.387887
ENSSSCG00000026161	0.378307	0.388105
ENSSSCG00000007659	0.47302	0.389031
ENSSSCG00000002436	0.364805	0.389069
ENSSSCG00000003811	0.471905	0.389913
ENSSSCG00000004353	0.278969	0.389983
ENSSSCG00000017943	-0.339923	0.392035
ENSSSCG00000040377	0.509955	0.3933
ENSSSCG00000020609	0.552182	0.3933
ENSSSCG00000007788	-0.386678	0.393697
ENSSSCG00000007527	-0.549982	0.393697
ENSSSCG00000005094	0.486087	0.393859
ENSSSCG00000003353	0.507504	0.393859
ENSSSCG00000004829	0.403592	0.393859
ENSSSCG00000022009	-0.543708	0.393859
ENSSSCG00000043663	0.525575	0.393859
ENSSSCG00000012102	-0.291604	0.393859
ENSSSCG00000011049	0.23174	0.393859
ENSSSCG00000017277	0.269526	0.393859
ENSSSCG00000026894	-0.380668	0.393859
ENSSSCG00000031144	-0.405354	0.393859
ENSSSCG00000046387	-0.264953	0.395424
ENSSSCG00000046885	-0.547677	0.395424
ENSSSCG00000005380	-0.424042	0.399454
ENSSSCG00000016983	-0.542988	0.399454
ENSSSCG00000021149	-0.26029	0.399567
ENSSSCG00000025589	0.53038	0.39981
ENSSSCG00000021846	0.546904	0.400191
ENSSSCG00000011110	0.366988	0.400191
ENSSSCG00000023231	-0.361614	0.400357
ENSSSCG00000012619	-0.257693	0.401369
ENSSSCG00000048207	0.515479	0.402116
ENSSSCG00000039135	-0.533608	0.402116
ENSSSCG00000020912	0.462216	0.409106
ENSSSCG00000008122	0.522566	0.409215
ENSSSCG00000002349	0.450217	0.409215
ENSSSCG00000036201	-0.513001	0.410129
ENSSSCG00000007768	0.377799	0.410393
ENSSSCG00000017025	0.472375	0.410393
ENSSSCG00000005704	-0.425189	0.410437
ENSSSCG00000011967	-0.538091	0.410437
ENSSSCG00000032223	-0.370997	0.410437
ENSSSCG00000015673	-0.245061	0.410641
ENSSSCG00000006398	-0.386249	0.410641
ENSSSCG00000011107	-0.188579	0.410641
ENSSSCG00000011514	0.285672	0.411685
ENSSSCG00000014316	0.475486	0.411685
ENSSSCG00000025186	-0.351748	0.411685
ENSSSCG00000042647	0.534653	0.411685
ENSSSCG00000006874	0.503024	0.411685
ENSSSCG00000034522	-0.31439	0.411685
ENSSSCG00000049355	-0.463376	0.411685
ENSSSCG00000016521	-0.516949	0.411685
ENSSSCG00000039480	0.33596	0.412161
ENSSSCG00000028228	-0.242122	0.412161
ENSSSCG00000002707	0.273366	0.413467
ENSSSCG00000020856	-0.336978	0.413795
ENSSSCG00000006862	0.36684	0.413795
ENSSSCG00000003708	0.311962	0.416316
ENSSSCG00000023325	-0.534959	0.41646
ENSSSCG00000035152	0.398657	0.41646
ENSSSCG00000034418	0.324902	0.41899
ENSSSCG00000002037	-0.478682	0.41904
ENSSSCG00000005310	0.501057	0.419739
ENSSSCG00000013303	-0.41833	0.419739
ENSSSCG00000028225	-0.304154	0.419739
ENSSSCG00000041875	0.268418	0.419739
ENSSSCG00000005215	-0.208422	0.421047
ENSSSCG00000040977	0.323158	0.421047
ENSSSCG00000048218	0.502807	0.421047
ENSSSCG00000000084	-0.384819	0.421047
ENSSSCG00000013895	-0.276299	0.422257
ENSSSCG00000023522	0.316517	0.422257
ENSSSCG00000010446	0.220389	0.422542
ENSSSCG00000042892	-0.537254	0.422869
ENSSSCG00000028202	-0.373009	0.42317
ENSSSCG00000028471	0.531665	0.423319
ENSSSCG00000015512	0.537172	0.423478
ENSSSCG00000037494	0.517091	0.423825
ENSSSCG00000014048	-0.323999	0.423825
ENSSSCG00000014057	-0.215473	0.423825
ENSSSCG00000009045	0.505602	0.423825
ENSSSCG00000006369	0.398704	0.423825
ENSSSCG00000040446	-0.52829	0.423825
ENSSSCG00000002368	0.382143	0.423825
ENSSSCG00000039287	-0.535752	0.423825
ENSSSCG00000033558	0.510937	0.423825
ENSSSCG00000010872	-0.295266	0.423825
ENSSSCG00000015379	0.385471	0.424582
ENSSSCG00000015357	0.366992	0.424734
ENSSSCG00000000906	-0.313953	0.42541
ENSSSCG00000022989	0.319357	0.426468
ENSSSCG00000041545	0.520207	0.427386
ENSSSCG00000037291	-0.502101	0.427909
ENSSSCG00000012583	-0.256297	0.427909
ENSSSCG00000009817	0.394804	0.429198
ENSSSCG00000022161	0.430178	0.432879
ENSSSCG00000044381	-0.529505	0.434413
ENSSSCG00000037594	0.203305	0.434666
ENSSSCG00000042706	0.450031	0.437406
ENSSSCG00000004055	-0.45758	0.438482
ENSSSCG00000005593	0.45964	0.438482
ENSSSCG00000046495	0.522035	0.438482
ENSSSCG00000009741	-0.337466	0.438482
ENSSSCG00000015079	0.418075	0.438482
ENSSSCG00000031780	0.302795	0.438482
ENSSSCG00000008799	0.33239	0.438482
ENSSSCG00000000998	-0.369388	0.438482
ENSSSCG00000026333	-0.522461	0.438482
ENSSSCG00000027676	-0.339536	0.438482
ENSSSCG00000016129	0.530224	0.438811
ENSSSCG00000015266	0.262769	0.438851
ENSSSCG00000007979	-0.26351	0.438851
ENSSSCG00000002430	0.303447	0.438851
ENSSSCG00000000651	-0.514573	0.438851
ENSSSCG00000000258	-0.439364	0.438851
ENSSSCG00000007140	0.420404	0.438851
ENSSSCG00000048436	0.527173	0.438851
ENSSSCG00000032266	-0.358468	0.438851
ENSSSCG00000033392	-0.365861	0.440096
ENSSSCG00000023975	-0.524393	0.440096
ENSSSCG00000002989	-0.256464	0.440096
ENSSSCG00000003006	0.383409	0.440096
ENSSSCG00000003718	-0.290338	0.440096
ENSSSCG00000041827	0.37477	0.440096
ENSSSCG00000004598	0.398396	0.441069
ENSSSCG00000023229	0.51819	0.441069
ENSSSCG00000003898	-0.277069	0.441069
ENSSSCG00000041704	-0.492871	0.441069
ENSSSCG00000023727	-0.249711	0.441069
ENSSSCG00000020954	-0.285754	0.441879
ENSSSCG00000006213	0.507832	0.441879
ENSSSCG00000022299	0.254605	0.442217
ENSSSCG00000003343	-0.481254	0.442217
ENSSSCG00000003940	0.45438	0.442217
ENSSSCG00000003670	-0.190495	0.442217
ENSSSCG00000013100	0.352387	0.442217
ENSSSCG00000009874	0.510168	0.442217
ENSSSCG00000009880	0.328344	0.442217
ENSSSCG00000007904	0.496329	0.442217
ENSSSCG00000002431	0.346709	0.442217
ENSSSCG00000017274	-0.297116	0.442217
ENSSSCG00000038843	0.301197	0.442841
ENSSSCG00000035432	-0.280077	0.442841
ENSSSCG00000033783	0.515143	0.442841
ENSSSCG00000011047	0.321314	0.442841
ENSSSCG00000034049	0.509788	0.442841
ENSSSCG00000044072	-0.524407	0.446872
ENSSSCG00000032702	0.511084	0.446887
ENSSSCG00000002923	-0.451763	0.446887
ENSSSCG00000041667	0.453071	0.446887
ENSSSCG00000044939	-0.322125	0.446887
ENSSSCG00000015090	-0.383863	0.446887
ENSSSCG00000044834	-0.518613	0.446887
ENSSSCG00000007514	-0.198376	0.446887
ENSSSCG00000027847	-0.494963	0.447133
ENSSSCG00000040013	0.45279	0.450165
ENSSSCG00000040752	-0.48347	0.450325
ENSSSCG00000025455	0.270687	0.451179
ENSSSCG00000042304	0.5185	0.451179
ENSSSCG00000051612	0.520818	0.451279
ENSSSCG00000040388	0.346729	0.451279
ENSSSCG00000027334	-0.446398	0.451402
ENSSSCG00000003885	-0.37933	0.454327
ENSSSCG00000023376	0.43302	0.458136
ENSSSCG00000025943	0.443476	0.459033
ENSSSCG00000004270	-0.39626	0.45986
ENSSSCG00000003377	-0.283795	0.45986
ENSSSCG00000008966	0.246679	0.45986
ENSSSCG00000011037	0.49448	0.45986
ENSSSCG00000026585	0.505673	0.460453
ENSSSCG00000023665	0.304637	0.462258
ENSSSCG00000015938	-0.218906	0.462258
ENSSSCG00000033251	-0.476962	0.462258
ENSSSCG00000033181	0.518551	0.462258
ENSSSCG00000011663	0.487552	0.462836
ENSSSCG00000050830	0.481645	0.462836
ENSSSCG00000025326	0.400233	0.465211
ENSSSCG00000008263	0.51606	0.465211
ENSSSCG00000011516	0.357644	0.465447
ENSSSCG00000014060	0.342919	0.465447
ENSSSCG00000021941	0.356443	0.465447
ENSSSCG00000008631	0.378411	0.465447
ENSSSCG00000012622	0.400728	0.465447
ENSSSCG00000004048	-0.354849	0.465814
ENSSSCG00000036812	-0.341575	0.465814
ENSSSCG00000023520	0.432217	0.466833
ENSSSCG00000011260	0.454979	0.466833
ENSSSCG00000002998	-0.327216	0.466833
ENSSSCG00000037559	0.495848	0.466833
ENSSSCG00000009765	0.47457	0.466833
ENSSSCG00000009951	0.498038	0.466833
ENSSSCG00000050530	0.444175	0.466833
ENSSSCG00000015825	0.394348	0.466833
ENSSSCG00000014909	0.332821	0.466833
ENSSSCG00000008340	0.318227	0.466833
ENSSSCG00000032188	-0.429119	0.466833
ENSSSCG00000028549	0.359049	0.466833
ENSSSCG00000041066	0.471223	0.466833
ENSSSCG00000031262	0.406828	0.466833
ENSSSCG00000038963	-0.316794	0.466833
ENSSSCG00000048676	-0.511403	0.466833
ENSSSCG00000024895	-0.405408	0.466833
ENSSSCG00000034714	-0.300575	0.466833
ENSSSCG00000043551	0.515006	0.466833
ENSSSCG00000017308	-0.254523	0.466833
ENSSSCG00000030167	-0.418993	0.466833
ENSSSCG00000032438	0.495206	0.46708
ENSSSCG00000038992	0.476569	0.46708
ENSSSCG00000026473	0.448769	0.46708
ENSSSCG00000016635	0.513744	0.467378
ENSSSCG00000035364	0.411073	0.467798
ENSSSCG00000006309	-0.286976	0.467798
ENSSSCG00000040989	0.513005	0.467798
ENSSSCG00000043487	0.497115	0.469326
ENSSSCG00000038924	0.500261	0.469326
ENSSSCG00000035985	0.380364	0.469326
ENSSSCG00000013305	-0.219344	0.469326
ENSSSCG00000010340	0.414492	0.469326
ENSSSCG00000007602	-0.460079	0.469326
ENSSSCG00000008641	-0.284183	0.469326
ENSSSCG00000000915	0.4701	0.469326
ENSSSCG00000007438	0.248923	0.469326
ENSSSCG00000046916	0.407761	0.469326
ENSSSCG00000030269	-0.497034	0.469326
ENSSSCG00000017311	-0.477341	0.469326
ENSSSCG00000017421	-0.294154	0.469326
ENSSSCG00000016451	-0.385035	0.469326
ENSSSCG00000036947	-0.303811	0.469326
ENSSSCG00000040586	-0.34938	0.469546
ENSSSCG00000007984	-0.494462	0.469546
ENSSSCG00000013863	0.270863	0.470418
ENSSSCG00000008867	0.309243	0.470418
ENSSSCG00000016620	-0.431894	0.470418
ENSSSCG00000040448	0.508915	0.470901
ENSSSCG00000012657	-0.306567	0.470901
ENSSSCG00000034688	-0.468616	0.470901
ENSSSCG00000018050	0.352994	0.470901
ENSSSCG00000036504	0.436907	0.471017
ENSSSCG00000004694	-0.436196	0.471152
ENSSSCG00000049398	0.508266	0.471236
ENSSSCG00000005375	-0.492872	0.471236
ENSSSCG00000010252	-0.48532	0.472418
ENSSSCG00000042913	0.509319	0.472944
ENSSSCG00000010247	-0.281024	0.472944
ENSSSCG00000022454	-0.301744	0.472944
ENSSSCG00000030428	-0.335217	0.473302
ENSSSCG00000024351	0.386018	0.474329
ENSSSCG00000009138	0.416282	0.474551
ENSSSCG00000021815	-0.324743	0.474551
ENSSSCG00000004063	0.292799	0.475336
ENSSSCG00000011234	0.342229	0.475336
ENSSSCG00000023162	0.462801	0.475336
ENSSSCG00000033352	0.499189	0.475336
ENSSSCG00000000455	0.465506	0.475336
ENSSSCG00000032964	-0.456129	0.478364
ENSSSCG00000012846	-0.420073	0.48082
ENSSSCG00000004653	0.233682	0.480845
ENSSSCG00000039802	0.499349	0.480845
ENSSSCG00000003894	-0.475461	0.480845
ENSSSCG00000015810	0.439775	0.480845
ENSSSCG00000044484	-0.452911	0.480845
ENSSSCG00000009565	0.467091	0.480845
ENSSSCG00000017144	-0.472783	0.480845
ENSSSCG00000017203	-0.390785	0.480845
ENSSSCG00000016625	0.417842	0.480845
ENSSSCG00000004221	0.405206	0.481555
ENSSSCG00000001041	-0.315332	0.481555
ENSSSCG00000017750	0.329575	0.481555
ENSSSCG00000039713	-0.45693	0.481555
ENSSSCG00000029388	0.441371	0.481686
ENSSSCG00000004207	0.411385	0.481915
ENSSSCG00000005316	-0.258486	0.481989
ENSSSCG00000039271	0.50441	0.48199
ENSSSCG00000000802	-0.489908	0.482251
ENSSSCG00000000602	0.358886	0.482514
ENSSSCG00000027970	0.495774	0.485846
ENSSSCG00000001099	0.288441	0.485846
ENSSSCG00000022295	0.294646	0.486648
ENSSSCG00000011229	-0.184391	0.486648
ENSSSCG00000036537	0.259482	0.486648
ENSSSCG00000001732	0.360647	0.486648
ENSSSCG00000040559	0.452405	0.486951
ENSSSCG00000030168	0.44225	0.488211
ENSSSCG00000011532	0.237839	0.488211
ENSSSCG00000010669	-0.174911	0.488211
ENSSSCG00000028889	-0.323675	0.488211
ENSSSCG00000046702	-0.482799	0.488211
ENSSSCG00000031629	0.198678	0.488211
ENSSSCG00000030443	-0.290606	0.488211
ENSSSCG00000017471	-0.425579	0.488211
ENSSSCG00000003849	0.333016	0.488481
ENSSSCG00000030513	-0.441462	0.488481
ENSSSCG00000013595	-0.296513	0.488481
ENSSSCG00000012875	0.478512	0.488481
ENSSSCG00000014575	0.404052	0.488481
ENSSSCG00000037106	0.501242	0.488481
ENSSSCG00000001483	-0.500534	0.488481
ENSSSCG00000002385	0.496182	0.488481
ENSSSCG00000048375	-0.447698	0.489141
ENSSSCG00000051075	0.498128	0.490119
ENSSSCG00000013476	0.438448	0.490119
ENSSSCG00000015692	-0.165976	0.491343
ENSSSCG00000029460	0.499562	0.491727
ENSSSCG00000050853	0.449817	0.491925
ENSSSCG00000004347	0.33484	0.491925
ENSSSCG00000004969	-0.355964	0.491925
ENSSSCG00000004502	0.486192	0.491925
ENSSSCG00000004192	0.463658	0.491925
ENSSSCG00000024131	0.213232	0.491925
ENSSSCG00000044255	-0.487338	0.491925
ENSSSCG00000038907	-0.227874	0.491925
ENSSSCG00000003737	0.422159	0.491925
ENSSSCG00000036210	-0.203922	0.491925
ENSSSCG00000014267	-0.207143	0.491925
ENSSSCG00000010464	0.489748	0.491925
ENSSSCG00000035290	-0.466469	0.491925
ENSSSCG00000046745	-0.4946	0.491925
ENSSSCG00000026383	0.289884	0.491925
ENSSSCG00000015775	0.438941	0.491925
ENSSSCG00000032621	0.1765	0.491925
ENSSSCG00000014823	-0.3966	0.491925
ENSSSCG00000029943	-0.260918	0.491925
ENSSSCG00000031261	0.24387	0.491925
ENSSSCG00000048719	0.219114	0.491925
ENSSSCG00000012157	-0.408732	0.491925
ENSSSCG00000033451	-0.498483	0.491925
ENSSSCG00000037105	-0.262981	0.491925
ENSSSCG00000041180	0.347945	0.491925
ENSSSCG00000017397	0.412854	0.491925
ENSSSCG00000017125	-0.320854	0.491925
ENSSSCG00000032831	-0.347778	0.492078
ENSSSCG00000015963	-0.171519	0.492078
ENSSSCG00000030425	-0.384526	0.492762
ENSSSCG00000027378	0.333022	0.492762
ENSSSCG00000033912	0.272448	0.493209
ENSSSCG00000024613	0.380652	0.493209
ENSSSCG00000001068	0.48402	0.493209
ENSSSCG00000011344	0.491054	0.493379
ENSSSCG00000011760	-0.235862	0.493379
ENSSSCG00000013270	0.324254	0.493379
ENSSSCG00000016267	0.348031	0.493379
ENSSSCG00000038320	-0.269293	0.493379
ENSSSCG00000007733	-0.283369	0.493379
ENSSSCG00000006274	-0.379444	0.493379
ENSSSCG00000039222	0.388463	0.493379
ENSSSCG00000007145	-0.451152	0.493379
ENSSSCG00000035669	0.46132	0.493379
ENSSSCG00000012566	0.354446	0.494355
ENSSSCG00000012713	-0.192113	0.494849
ENSSSCG00000045050	0.494299	0.496768
ENSSSCG00000037245	-0.175298	0.497589
ENSSSCG00000014768	-0.467963	0.498281
ENSSSCG00000039109	-0.316948	0.498281
ENSSSCG00000009039	0.395522	0.498637
ENSSSCG00000006354	-0.432085	0.498637
ENSSSCG00000035598	0.491068	0.498637
ENSSSCG00000025704	-0.281131	0.501924
ENSSSCG00000031977	-0.437549	0.502052
ENSSSCG00000003715	0.344608	0.502955
ENSSSCG00000021464	-0.3342	0.502955
ENSSSCG00000021562	0.3845	0.502955
ENSSSCG00000032465	-0.49189	0.503825
ENSSSCG00000024635	0.342742	0.503825
ENSSSCG00000020878	-0.27545	0.504315
ENSSSCG00000002425	0.439197	0.504315
ENSSSCG00000007482	0.491467	0.50581
ENSSSCG00000004138	-0.228505	0.506954
ENSSSCG00000024827	0.332279	0.506954
ENSSSCG00000024791	0.365676	0.506954
ENSSSCG00000033926	-0.353421	0.506954
ENSSSCG00000017052	-0.295248	0.506954
ENSSSCG00000017288	-0.30226	0.506954
ENSSSCG00000030253	-0.288833	0.508012
ENSSSCG00000007572	0.400215	0.508265
ENSSSCG00000033654	-0.200204	0.508446
ENSSSCG00000038493	-0.153318	0.50871
ENSSSCG00000013074	0.470512	0.50871
ENSSSCG00000009699	0.467035	0.50871
ENSSSCG00000023181	0.489573	0.50871
ENSSSCG00000015276	0.483306	0.50871
ENSSSCG00000031809	-0.376464	0.50871
ENSSSCG00000012680	0.391904	0.50871
ENSSSCG00000007034	0.462898	0.50871
ENSSSCG00000003218	-0.444306	0.509631
ENSSSCG00000032731	0.484597	0.509631
ENSSSCG00000008010	-0.448939	0.509631
ENSSSCG00000011082	0.449819	0.509631
ENSSSCG00000006736	-0.287399	0.509692
ENSSSCG00000039823	0.472903	0.511739
ENSSSCG00000010540	0.313152	0.511739
ENSSSCG00000001233	-0.256283	0.511855
ENSSSCG00000004024	0.372451	0.512091
ENSSSCG00000014015	-0.349812	0.512091
ENSSSCG00000013294	-0.244313	0.512091
ENSSSCG00000023604	-0.333417	0.512091
ENSSSCG00000029790	0.322434	0.512091
ENSSSCG00000044419	-0.477256	0.512091
ENSSSCG00000001651	0.374049	0.512091
ENSSSCG00000002508	-0.172689	0.512091
ENSSSCG00000044936	0.486873	0.512091
ENSSSCG00000039658	-0.267079	0.512091
ENSSSCG00000025796	-0.440558	0.512091
ENSSSCG00000005150	-0.364158	0.513246
ENSSSCG00000004996	0.199917	0.513246
ENSSSCG00000004657	-0.308796	0.513246
ENSSSCG00000011245	0.366747	0.513246
ENSSSCG00000042592	0.364732	0.513246
ENSSSCG00000037734	-0.340359	0.513246
ENSSSCG00000036673	0.35078	0.513246
ENSSSCG00000003722	0.444827	0.513246
ENSSSCG00000003214	-0.400501	0.513246
ENSSSCG00000014558	0.411662	0.513246
ENSSSCG00000010589	-0.377925	0.513246
ENSSSCG00000028559	-0.359716	0.513246
ENSSSCG00000015786	0.349655	0.513246
ENSSSCG00000034607	0.35962	0.513246
ENSSSCG00000008162	-0.276426	0.513246
ENSSSCG00000005941	0.388033	0.513246
ENSSSCG00000030908	0.452607	0.513246
ENSSSCG00000037682	0.484133	0.513246
ENSSSCG00000016826	0.384215	0.513246
ENSSSCG00000009475	-0.362807	0.513246
ENSSSCG00000007275	-0.180676	0.513246
ENSSSCG00000018049	-0.274221	0.513246
ENSSSCG00000017868	-0.369014	0.513246
ENSSSCG00000013475	-0.296591	0.513452
ENSSSCG00000027447	-0.27178	0.513452
ENSSSCG00000036461	0.404537	0.513452
ENSSSCG00000035730	-0.309954	0.513551
ENSSSCG00000026689	-0.463837	0.513551
ENSSSCG00000037558	-0.234153	0.513551
ENSSSCG00000003371	0.456949	0.513898
ENSSSCG00000016033	0.367228	0.514941
ENSSSCG00000016160	0.394719	0.514941
ENSSSCG00000014794	-0.285014	0.514941
ENSSSCG00000032942	0.222767	0.514941
ENSSSCG00000016780	-0.430765	0.514941
ENSSSCG00000017207	-0.228221	0.515061
ENSSSCG00000022305	0.322726	0.515675
ENSSSCG00000024860	0.348527	0.515675
ENSSSCG00000012686	-0.287677	0.515675
ENSSSCG00000029536	0.411564	0.515762
ENSSSCG00000003385	-0.301713	0.516211
ENSSSCG00000037905	0.401795	0.517552
ENSSSCG00000042442	0.392005	0.517964
ENSSSCG00000051754	-0.46329	0.519414
ENSSSCG00000015235	-0.211837	0.519414
ENSSSCG00000001511	0.469309	0.519414
ENSSSCG00000032652	-0.42449	0.519414
ENSSSCG00000017385	-0.352743	0.519414
ENSSSCG00000023318	-0.308564	0.519849
ENSSSCG00000007830	0.243895	0.520651
ENSSSCG00000003062	-0.451194	0.520663
ENSSSCG00000020754	-0.333209	0.520663
ENSSSCG00000003111	-0.294498	0.520663
ENSSSCG00000021812	0.397618	0.520663
ENSSSCG00000014435	-0.160044	0.520663
ENSSSCG00000013891	-0.337976	0.520663
ENSSSCG00000022383	0.474258	0.520663
ENSSSCG00000009956	0.163294	0.520663
ENSSSCG00000015610	-0.472042	0.520663
ENSSSCG00000000118	-0.311804	0.520663
ENSSSCG00000031800	-0.377221	0.520663
ENSSSCG00000049805	-0.457305	0.520663
ENSSSCG00000039244	0.336785	0.520663
ENSSSCG00000017727	0.479719	0.520663
ENSSSCG00000047757	0.478408	0.520763
ENSSSCG00000017376	0.433459	0.520763
ENSSSCG00000011565	0.299259	0.520899
ENSSSCG00000024494	-0.285915	0.520899
ENSSSCG00000037358	0.391282	0.520899
ENSSSCG00000009151	0.442494	0.520899
ENSSSCG00000008724	-0.392956	0.520899
ENSSSCG00000006233	0.388407	0.520899
ENSSSCG00000037697	0.444837	0.520899
ENSSSCG00000007485	0.469143	0.520899
ENSSSCG00000047754	0.464602	0.521772
ENSSSCG00000028694	-0.24009	0.523806
ENSSSCG00000015808	0.177305	0.525442
ENSSSCG00000035736	0.477155	0.525442
ENSSSCG00000005949	-0.270504	0.525442
ENSSSCG00000000092	0.464312	0.525442
ENSSSCG00000034614	-0.360264	0.526576
ENSSSCG00000005102	-0.352772	0.526711
ENSSSCG00000006016	0.231568	0.526711
ENSSSCG00000003851	0.38103	0.528269
ENSSSCG00000022318	0.342017	0.528813
ENSSSCG00000037732	-0.22068	0.528813
ENSSSCG00000037451	-0.239811	0.529089
ENSSSCG00000002505	-0.130768	0.529099
ENSSSCG00000015545	0.288904	0.529223
ENSSSCG00000037309	-0.473685	0.529223
ENSSSCG00000006035	0.455798	0.529317
ENSSSCG00000042112	-0.449601	0.52939
ENSSSCG00000023001	0.400053	0.52939
ENSSSCG00000015315	0.343378	0.530913
ENSSSCG00000005901	-0.475263	0.530913
ENSSSCG00000013145	0.296964	0.53123
ENSSSCG00000027232	0.431614	0.532163
ENSSSCG00000042115	-0.416634	0.532419
ENSSSCG00000011186	-0.467308	0.533169
ENSSSCG00000026478	0.468868	0.533169
ENSSSCG00000014170	0.212644	0.533169
ENSSSCG00000013602	-0.224766	0.533169
ENSSSCG00000010429	0.325156	0.533169
ENSSSCG00000015618	0.446475	0.533169
ENSSSCG00000039175	0.253011	0.533169
ENSSSCG00000008041	-0.422383	0.533169
ENSSSCG00000002051	0.439718	0.533169
ENSSSCG00000016968	-0.198099	0.533169
ENSSSCG00000013550	-0.432454	0.533403
ENSSSCG00000039045	-0.46872	0.53473
ENSSSCG00000022945	-0.352824	0.53473
ENSSSCG00000037803	0.278658	0.535863
ENSSSCG00000049630	0.306817	0.535863
ENSSSCG00000034290	0.225342	0.537329
ENSSSCG00000004132	-0.23724	0.53862
ENSSSCG00000012698	-0.248393	0.53862
ENSSSCG00000015794	0.4109	0.539675
ENSSSCG00000016243	-0.241928	0.539675
ENSSSCG00000025179	0.307488	0.539675
ENSSSCG00000012035	0.214316	0.541545
ENSSSCG00000009975	0.423624	0.543029
ENSSSCG00000039541	-0.237037	0.543207
ENSSSCG00000036988	-0.322427	0.544492
ENSSSCG00000011783	-0.319232	0.545129
ENSSSCG00000051734	0.466391	0.545129
ENSSSCG00000009373	-0.37578	0.545129
ENSSSCG00000009142	-0.18891	0.545452
ENSSSCG00000030538	-0.434885	0.545915
ENSSSCG00000023225	-0.458056	0.546336
ENSSSCG00000047947	0.405343	0.546336
ENSSSCG00000001958	-0.192313	0.546336
ENSSSCG00000027514	-0.43898	0.546336
ENSSSCG00000011426	0.290999	0.546746
ENSSSCG00000013919	0.392398	0.546746
ENSSSCG00000013734	-0.430934	0.546746
ENSSSCG00000035102	0.433277	0.546746
ENSSSCG00000027726	0.443763	0.546999
ENSSSCG00000004340	0.462748	0.546999
ENSSSCG00000004373	-0.254075	0.546999
ENSSSCG00000011306	-0.400909	0.546999
ENSSSCG00000011415	0.296756	0.546999
ENSSSCG00000050878	0.455814	0.546999
ENSSSCG00000021374	0.443189	0.546999
ENSSSCG00000043170	-0.463269	0.546999
ENSSSCG00000027119	-0.413068	0.546999
ENSSSCG00000031460	0.434674	0.546999
ENSSSCG00000038006	-0.371156	0.546999
ENSSSCG00000025323	-0.18086	0.546999
ENSSSCG00000003477	0.375201	0.546999
ENSSSCG00000024800	0.446506	0.546999
ENSSSCG00000022029	-0.4511	0.546999
ENSSSCG00000003524	0.446077	0.546999
ENSSSCG00000002777	0.431143	0.546999
ENSSSCG00000012896	-0.288699	0.546999
ENSSSCG00000013010	-0.45246	0.546999
ENSSSCG00000039500	0.459644	0.546999
ENSSSCG00000028762	0.254631	0.546999
ENSSSCG00000033043	0.462836	0.546999
ENSSSCG00000049635	0.451222	0.546999
ENSSSCG00000009814	-0.292235	0.546999
ENSSSCG00000009825	-0.171994	0.546999
ENSSSCG00000033879	-0.457136	0.546999
ENSSSCG00000036877	0.40484	0.546999
ENSSSCG00000024373	-0.119331	0.546999
ENSSSCG00000041560	0.457349	0.546999
ENSSSCG00000047064	0.424063	0.546999
ENSSSCG00000038469	0.304091	0.546999
ENSSSCG00000047749	0.361136	0.546999
ENSSSCG00000026110	-0.172439	0.546999
ENSSSCG00000014972	0.20542	0.546999
ENSSSCG00000008773	-0.332619	0.546999
ENSSSCG00000008801	0.293129	0.546999
ENSSSCG00000009231	-0.439168	0.546999
ENSSSCG00000008853	0.390061	0.546999
ENSSSCG00000041304	0.440961	0.546999
ENSSSCG00000043550	0.392583	0.546999
ENSSSCG00000038148	0.468558	0.546999
ENSSSCG00000040621	0.467515	0.546999
ENSSSCG00000008510	0.350255	0.546999
ENSSSCG00000034154	-0.3194	0.546999
ENSSSCG00000007797	-0.25947	0.546999
ENSSSCG00000006923	-0.227143	0.546999
ENSSSCG00000006482	0.316242	0.546999
ENSSSCG00000005975	0.350825	0.546999
ENSSSCG00000012487	0.4261	0.546999
ENSSSCG00000002307	-0.277231	0.546999
ENSSSCG00000043413	-0.441737	0.546999
ENSSSCG00000034610	0.467476	0.546999
ENSSSCG00000000972	-0.457898	0.546999
ENSSSCG00000027266	-0.394326	0.546999
ENSSSCG00000038694	-0.285258	0.546999
ENSSSCG00000039474	0.448196	0.546999
ENSSSCG00000016850	0.305267	0.546999
ENSSSCG00000009300	0.40976	0.546999
ENSSSCG00000011101	0.241217	0.546999
ENSSSCG00000011103	0.271002	0.546999
ENSSSCG00000024480	-0.25629	0.546999
ENSSSCG00000010996	0.32025	0.546999
ENSSSCG00000007288	-0.443159	0.546999
ENSSSCG00000007023	-0.254979	0.546999
ENSSSCG00000033272	-0.230213	0.546999
ENSSSCG00000016650	-0.334634	0.546999
ENSSSCG00000016737	-0.322966	0.546999
ENSSSCG00000013615	-0.312986	0.547531
ENSSSCG00000000137	0.277293	0.547531
ENSSSCG00000030386	-0.255811	0.547619
ENSSSCG00000015083	0.373094	0.547853
ENSSSCG00000016866	0.314756	0.548704
ENSSSCG00000022209	-0.44566	0.549156
ENSSSCG00000010655	0.348356	0.550109
ENSSSCG00000017543	0.192364	0.550109
ENSSSCG00000039598	-0.305742	0.551164
ENSSSCG00000044246	0.454361	0.551164
ENSSSCG00000025784	0.45967	0.551774
ENSSSCG00000033332	-0.267968	0.551774
ENSSSCG00000004458	0.436212	0.551874
ENSSSCG00000036766	0.281015	0.551874
ENSSSCG00000007530	0.379184	0.551874
ENSSSCG00000007465	-0.246273	0.551874
ENSSSCG00000004542	-0.338566	0.551953
ENSSSCG00000031337	0.302259	0.553129
ENSSSCG00000043340	-0.438749	0.553187
ENSSSCG00000041675	0.439844	0.553187
ENSSSCG00000027197	-0.401749	0.555459
ENSSSCG00000008694	-0.320459	0.555459
ENSSSCG00000006166	-0.302601	0.555985
ENSSSCG00000006831	-0.435164	0.556625
ENSSSCG00000026217	0.401974	0.556625
ENSSSCG00000049108	0.457216	0.557204
ENSSSCG00000039194	0.329628	0.557204
ENSSSCG00000036822	0.370404	0.557204
ENSSSCG00000015584	0.401958	0.557204
ENSSSCG00000008444	-0.216897	0.557204
ENSSSCG00000023706	0.386186	0.557204
ENSSSCG00000017165	-0.243963	0.557204
ENSSSCG00000017514	-0.215631	0.557204
ENSSSCG00000029385	0.441151	0.557649
ENSSSCG00000030247	0.276414	0.558126
ENSSSCG00000003362	-0.301189	0.558126
ENSSSCG00000014361	0.287328	0.558126
ENSSSCG00000042317	0.41463	0.558126
ENSSSCG00000024789	-0.249642	0.558126
ENSSSCG00000027765	0.185576	0.558688
ENSSSCG00000022197	0.236649	0.558688
ENSSSCG00000001983	0.457742	0.558688
ENSSSCG00000011643	0.310241	0.559387
ENSSSCG00000034645	0.25577	0.560344
ENSSSCG00000023371	0.401876	0.560601
ENSSSCG00000010261	-0.311743	0.560601
ENSSSCG00000041986	0.441653	0.560645
ENSSSCG00000022073	0.328523	0.560645
ENSSSCG00000045093	0.429032	0.560645
ENSSSCG00000017790	-0.210306	0.560645
ENSSSCG00000002391	0.390259	0.561411
ENSSSCG00000008137	-0.16648	0.561834
ENSSSCG00000012363	0.437762	0.561834
ENSSSCG00000001756	-0.22504	0.561834
ENSSSCG00000038007	0.418611	0.561834
ENSSSCG00000040690	0.392723	0.561834
ENSSSCG00000045730	-0.451233	0.562323
ENSSSCG00000030679	0.358936	0.562548
ENSSSCG00000005656	-0.171339	0.562548
ENSSSCG00000010821	-0.311814	0.563095
ENSSSCG00000040507	-0.251759	0.563447
ENSSSCG00000010493	0.34802	0.563447
ENSSSCG00000012378	-0.376283	0.563447
ENSSSCG00000031775	-0.176781	0.563447
ENSSSCG00000040445	0.345557	0.563454
ENSSSCG00000038180	0.307149	0.563454
ENSSSCG00000037846	-0.359004	0.563454
ENSSSCG00000037991	0.439756	0.563454
ENSSSCG00000022719	-0.4141	0.564706
ENSSSCG00000016519	-0.383666	0.565257
ENSSSCG00000012590	0.398211	0.565521
ENSSSCG00000014073	0.255225	0.565903
ENSSSCG00000037637	0.305244	0.566173
ENSSSCG00000003740	0.413688	0.566263
ENSSSCG00000010281	0.302302	0.566468
ENSSSCG00000036049	-0.42929	0.56724
ENSSSCG00000015726	0.342895	0.567304
ENSSSCG00000034763	0.330525	0.567304
ENSSSCG00000007170	-0.363679	0.569673
ENSSSCG00000004328	-0.192015	0.570792
ENSSSCG00000036984	0.425647	0.570792
ENSSSCG00000031249	0.216112	0.570792
ENSSSCG00000005959	-0.14552	0.570792
ENSSSCG00000006636	-0.180766	0.570792
ENSSSCG00000013363	0.402219	0.571655
ENSSSCG00000036443	0.452734	0.572148
ENSSSCG00000009879	0.31831	0.573484
ENSSSCG00000026819	0.347003	0.573484
ENSSSCG00000026617	-0.303579	0.573484
ENSSSCG00000040859	0.400904	0.573484
ENSSSCG00000004351	-0.278543	0.573664
ENSSSCG00000003798	-0.209124	0.573664
ENSSSCG00000024443	-0.292819	0.573664
ENSSSCG00000012911	0.401718	0.573664
ENSSSCG00000033367	0.188808	0.573664
ENSSSCG00000049107	-0.200218	0.573707
ENSSSCG00000003068	-0.314962	0.573707
ENSSSCG00000037958	0.231272	0.574042
ENSSSCG00000007812	-0.195804	0.574683
ENSSSCG00000037530	0.410129	0.574782
ENSSSCG00000005933	0.408228	0.575319
ENSSSCG00000032171	-0.2186	0.575319
ENSSSCG00000004873	-0.410815	0.575554
ENSSSCG00000004142	0.41766	0.575554
ENSSSCG00000011666	-0.424448	0.575554
ENSSSCG00000011729	0.364253	0.575554
ENSSSCG00000021408	-0.305199	0.575554
ENSSSCG00000024567	-0.383771	0.575554
ENSSSCG00000032660	0.446852	0.575554
ENSSSCG00000003551	-0.442327	0.575554
ENSSSCG00000013662	-0.317891	0.575554
ENSSSCG00000012845	-0.449651	0.575554
ENSSSCG00000010198	-0.276582	0.575554
ENSSSCG00000032475	-0.335497	0.575554
ENSSSCG00000009859	0.350437	0.575554
ENSSSCG00000015793	0.378598	0.575554
ENSSSCG00000024028	0.26029	0.575554
ENSSSCG00000008898	0.386525	0.575554
ENSSSCG00000007622	0.438266	0.575554
ENSSSCG00000051386	0.446679	0.575554
ENSSSCG00000005970	-0.381373	0.575554
ENSSSCG00000006720	0.335545	0.575554
ENSSSCG00000006237	0.353668	0.575554
ENSSSCG00000040599	-0.43398	0.575554
ENSSSCG00000049534	0.372176	0.575554
ENSSSCG00000041613	0.412727	0.575554
ENSSSCG00000038650	-0.450387	0.575554
ENSSSCG00000000887	-0.268774	0.575554
ENSSSCG00000042109	0.423457	0.575619
ENSSSCG00000015823	0.272086	0.575807
ENSSSCG00000017146	-0.433788	0.578212
ENSSSCG00000007019	-0.205224	0.578693
ENSSSCG00000022451	-0.298795	0.578815
ENSSSCG00000028602	-0.294497	0.579038
ENSSSCG00000036039	0.277227	0.580014
ENSSSCG00000005423	0.305489	0.580508
ENSSSCG00000003022	0.43058	0.580508
ENSSSCG00000040687	0.377467	0.580978
ENSSSCG00000024837	-0.436032	0.580978
ENSSSCG00000026606	0.258148	0.580978
ENSSSCG00000013114	0.351774	0.580978
ENSSSCG00000009776	-0.208096	0.580978
ENSSSCG00000040847	-0.242654	0.580978
ENSSSCG00000008812	-0.23958	0.580978
ENSSSCG00000007909	0.429369	0.580978
ENSSSCG00000028020	-0.249436	0.580978
ENSSSCG00000006199	0.342339	0.580978
ENSSSCG00000000600	0.344208	0.580978
ENSSSCG00000007022	0.406282	0.580978
ENSSSCG00000045449	-0.39862	0.580998
ENSSSCG00000024418	-0.445779	0.580998
ENSSSCG00000003410	0.336488	0.581378
ENSSSCG00000001052	0.247943	0.581378
ENSSSCG00000031991	0.334628	0.581378
ENSSSCG00000036693	0.428267	0.581378
ENSSSCG00000004058	0.246525	0.581653
ENSSSCG00000025316	0.230648	0.581653
ENSSSCG00000043328	-0.445182	0.581653
ENSSSCG00000037445	-0.250159	0.581653
ENSSSCG00000033036	0.229004	0.581653
ENSSSCG00000047338	-0.44148	0.581653
ENSSSCG00000049189	-0.429452	0.581653
ENSSSCG00000036820	0.433343	0.581653
ENSSSCG00000014812	0.442002	0.58312
ENSSSCG00000001930	-0.268573	0.583466
ENSSSCG00000011263	-0.442956	0.583571
ENSSSCG00000037701	0.428748	0.583571
ENSSSCG00000036551	-0.444195	0.58465
ENSSSCG00000030677	-0.272921	0.58465
ENSSSCG00000003950	0.442867	0.58465
ENSSSCG00000039940	0.383064	0.58465
ENSSSCG00000031589	0.417326	0.58465
ENSSSCG00000010508	0.17513	0.58465
ENSSSCG00000009243	0.309067	0.58465
ENSSSCG00000008948	0.332945	0.58465
ENSSSCG00000006079	0.389359	0.58465
ENSSSCG00000001731	-0.338467	0.58465
ENSSSCG00000027190	0.339788	0.58465
ENSSSCG00000015135	-0.248903	0.58475
ENSSSCG00000017386	-0.202583	0.585018
ENSSSCG00000026412	0.362101	0.585294
ENSSSCG00000017953	-0.24266	0.585294
ENSSSCG00000038192	0.404	0.585294
ENSSSCG00000008066	-0.374087	0.586379
ENSSSCG00000002350	0.197074	0.586379
ENSSSCG00000009646	0.437713	0.587821
ENSSSCG00000008031	0.354734	0.587821
ENSSSCG00000001475	-0.321362	0.587821
ENSSSCG00000029991	0.370889	0.587947
ENSSSCG00000023503	0.407259	0.588383
ENSSSCG00000038308	-0.269948	0.589234
ENSSSCG00000005425	0.301281	0.591213
ENSSSCG00000028444	0.237787	0.591213
ENSSSCG00000000649	-0.392373	0.591213
ENSSSCG00000000299	-0.299541	0.591502
ENSSSCG00000015892	-0.185834	0.592185
ENSSSCG00000002004	-0.318797	0.592351
ENSSSCG00000005106	0.376318	0.592435
ENSSSCG00000005627	-0.434024	0.592659
ENSSSCG00000012061	0.391834	0.592659
ENSSSCG00000040793	-0.326282	0.592659
ENSSSCG00000010267	-0.426338	0.592659
ENSSSCG00000010529	0.429051	0.592659
ENSSSCG00000010145	-0.219169	0.592659
ENSSSCG00000022358	0.270285	0.592659
ENSSSCG00000008449	-0.429383	0.592659
ENSSSCG00000005711	-0.218552	0.593666
ENSSSCG00000014356	0.262802	0.594205
ENSSSCG00000026748	-0.332094	0.594205
ENSSSCG00000035006	0.425513	0.594205
ENSSSCG00000023377	0.305123	0.594563
ENSSSCG00000009881	-0.432204	0.594698
ENSSSCG00000028195	0.25536	0.594698
ENSSSCG00000033623	0.421341	0.594698
ENSSSCG00000025565	-0.286926	0.594698
ENSSSCG00000006048	0.263764	0.594698
ENSSSCG00000028336	0.231354	0.594698
ENSSSCG00000009557	-0.295588	0.594698
ENSSSCG00000009563	0.2578	0.594698
ENSSSCG00000017738	0.310093	0.594698
ENSSSCG00000037606	0.367183	0.594698
ENSSSCG00000011943	-0.130246	0.595118
ENSSSCG00000033760	0.404124	0.595118
ENSSSCG00000012920	0.41284	0.595118
ENSSSCG00000010344	0.438332	0.595118
ENSSSCG00000008974	-0.2079	0.595118
ENSSSCG00000051710	0.395504	0.595118
ENSSSCG00000010537	-0.302754	0.59596
ENSSSCG00000004909	0.427798	0.59678
ENSSSCG00000014171	-0.283458	0.59678
ENSSSCG00000044883	0.437425	0.598247
ENSSSCG00000006375	0.242025	0.599227
ENSSSCG00000002908	-0.372022	0.600216
ENSSSCG00000014034	0.436252	0.600216
ENSSSCG00000007542	0.380128	0.600216
ENSSSCG00000024973	-0.332359	0.600216
ENSSSCG00000031083	-0.247974	0.60073
ENSSSCG00000030597	0.407067	0.60073
ENSSSCG00000017033	0.177424	0.60075
ENSSSCG00000005227	-0.21758	0.60136
ENSSSCG00000003552	-0.400052	0.60136
ENSSSCG00000027860	-0.197515	0.60136
ENSSSCG00000042447	0.349611	0.60136
ENSSSCG00000031905	0.435631	0.601732
ENSSSCG00000034516	0.418316	0.602059
ENSSSCG00000023171	0.253349	0.602059
ENSSSCG00000016917	0.387781	0.602059
ENSSSCG00000007061	-0.350261	0.602059
ENSSSCG00000014600	-0.309814	0.602652
ENSSSCG00000020717	0.341653	0.602652
ENSSSCG00000000437	-0.341758	0.602864
ENSSSCG00000008298	-0.202827	0.603103
ENSSSCG00000001838	0.325177	0.603103
ENSSSCG00000021803	-0.258147	0.603237
ENSSSCG00000014035	0.430317	0.603237
ENSSSCG00000035854	-0.282426	0.603786
ENSSSCG00000010517	-0.283411	0.60495
ENSSSCG00000005378	-0.3663	0.605255
ENSSSCG00000011542	-0.189901	0.605255
ENSSSCG00000040037	0.36951	0.605255
ENSSSCG00000003762	0.351697	0.605255
ENSSSCG00000003771	-0.168959	0.605255
ENSSSCG00000038994	-0.234136	0.605255
ENSSSCG00000028567	0.368393	0.605255
ENSSSCG00000026098	0.432312	0.605255
ENSSSCG00000050433	0.383906	0.605255
ENSSSCG00000009940	0.42363	0.605255
ENSSSCG00000029781	-0.433141	0.605255
ENSSSCG00000016211	0.368172	0.605255
ENSSSCG00000035061	0.31604	0.605255
ENSSSCG00000002452	0.349273	0.605255
ENSSSCG00000031719	0.340395	0.605255
ENSSSCG00000024914	-0.402417	0.605255
ENSSSCG00000000807	-0.261676	0.605255
ENSSSCG00000010826	0.42418	0.605255
ENSSSCG00000034722	0.433492	0.605255
ENSSSCG00000035675	0.329427	0.605255
ENSSSCG00000040205	0.357302	0.60582
ENSSSCG00000003825	0.328103	0.606047
ENSSSCG00000008259	0.428651	0.606047
ENSSSCG00000000202	-0.409808	0.606047
ENSSSCG00000004304	0.197551	0.6061
ENSSSCG00000041355	-0.364776	0.6061
ENSSSCG00000038663	-0.363074	0.6061
ENSSSCG00000005305	0.368945	0.6061
ENSSSCG00000004081	0.294387	0.6061
ENSSSCG00000004165	0.283254	0.6061
ENSSSCG00000004193	0.297536	0.6061
ENSSSCG00000027709	-0.359892	0.6061
ENSSSCG00000039888	0.408748	0.6061
ENSSSCG00000029219	-0.416351	0.6061
ENSSSCG00000033546	-0.398648	0.6061
ENSSSCG00000024872	-0.426115	0.6061
ENSSSCG00000022592	0.430381	0.6061
ENSSSCG00000010503	0.208472	0.6061
ENSSSCG00000016034	0.317246	0.6061
ENSSSCG00000015660	-0.429336	0.6061
ENSSSCG00000008835	0.399208	0.6061
ENSSSCG00000046655	-0.389077	0.6061
ENSSSCG00000021287	0.20079	0.6061
ENSSSCG00000007543	-0.322241	0.6061
ENSSSCG00000006350	0.311953	0.6061
ENSSSCG00000006475	-0.418057	0.6061
ENSSSCG00000050527	-0.408329	0.6061
ENSSSCG00000001679	-0.272977	0.6061
ENSSSCG00000001045	0.350977	0.6061
ENSSSCG00000049407	0.321473	0.6061
ENSSSCG00000048792	-0.316814	0.6061
ENSSSCG00000030113	0.426006	0.6061
ENSSSCG00000011104	-0.189239	0.6061
ENSSSCG00000007203	-0.169781	0.6061
ENSSSCG00000007525	-0.405359	0.6061
ENSSSCG00000007005	0.404446	0.6061
ENSSSCG00000017139	-0.285169	0.6061
ENSSSCG00000018015	-0.410888	0.6061
ENSSSCG00000004012	0.413925	0.606893
ENSSSCG00000035284	0.349159	0.606893
ENSSSCG00000023177	-0.383784	0.606893
ENSSSCG00000011813	0.327636	0.606893
ENSSSCG00000044385	-0.429195	0.606893
ENSSSCG00000003341	-0.428002	0.606893
ENSSSCG00000027423	0.415946	0.606893
ENSSSCG00000038494	-0.145917	0.606893
ENSSSCG00000031346	0.293143	0.606893
ENSSSCG00000035249	0.414118	0.606893
ENSSSCG00000039332	0.404773	0.606893
ENSSSCG00000008854	0.397343	0.606893
ENSSSCG00000042386	0.213755	0.606893
ENSSSCG00000012258	-0.29164	0.606893
ENSSSCG00000047079	-0.370689	0.606893
ENSSSCG00000000642	0.429553	0.606893
ENSSSCG00000016915	0.427246	0.606893
ENSSSCG00000024145	-0.274259	0.606893
ENSSSCG00000021494	-0.330539	0.606893
ENSSSCG00000012318	-0.292639	0.607156
ENSSSCG00000035883	-0.366224	0.60822
ENSSSCG00000003352	-0.29626	0.60822
ENSSSCG00000025500	0.425254	0.60822
ENSSSCG00000035347	0.423355	0.60822
ENSSSCG00000032296	0.38919	0.60822
ENSSSCG00000015959	0.298305	0.60822
ENSSSCG00000028322	0.380539	0.60822
ENSSSCG00000022448	0.427514	0.60822
ENSSSCG00000008813	0.391008	0.60822
ENSSSCG00000033450	-0.272679	0.60822
ENSSSCG00000006392	-0.40806	0.60822
ENSSSCG00000006413	0.387572	0.60822
ENSSSCG00000040728	-0.352803	0.60822
ENSSSCG00000047716	-0.419382	0.60822
ENSSSCG00000044013	-0.379195	0.60822
ENSSSCG00000001431	-0.426955	0.60822
ENSSSCG00000022288	-0.313624	0.60822
ENSSSCG00000044350	0.409312	0.60822
ENSSSCG00000007512	-0.277924	0.60822
ENSSSCG00000023992	0.317087	0.60822
ENSSSCG00000025254	0.291668	0.60822
ENSSSCG00000033190	0.41008	0.60822
ENSSSCG00000031941	-0.36282	0.609573
ENSSSCG00000009872	0.278427	0.609573
ENSSSCG00000025996	-0.345215	0.609573
ENSSSCG00000033116	0.329397	0.609573
ENSSSCG00000008372	-0.192789	0.60981
ENSSSCG00000004617	0.197292	0.610651
ENSSSCG00000050113	-0.359524	0.610876
ENSSSCG00000004090	0.218208	0.610876
ENSSSCG00000003017	-0.224558	0.610876
ENSSSCG00000015913	-0.425161	0.610876
ENSSSCG00000006365	0.252755	0.610876
ENSSSCG00000004109	-0.207564	0.611665
ENSSSCG00000011325	-0.394587	0.611665
ENSSSCG00000046113	0.425123	0.611665
ENSSSCG00000002716	-0.372116	0.611665
ENSSSCG00000003144	-0.222695	0.611665
ENSSSCG00000003821	0.412035	0.611665
ENSSSCG00000016017	0.239455	0.611665
ENSSSCG00000023716	0.363787	0.611665
ENSSSCG00000032503	0.42392	0.611665
ENSSSCG00000007700	0.382582	0.611665
ENSSSCG00000032921	-0.399183	0.611665
ENSSSCG00000006230	0.283902	0.611665
ENSSSCG00000021130	-0.373148	0.611665
ENSSSCG00000000405	-0.298636	0.611665
ENSSSCG00000034491	-0.319871	0.611665
ENSSSCG00000044736	-0.313628	0.611665
ENSSSCG00000040386	-0.3549	0.613651
ENSSSCG00000015677	0.36565	0.613651
ENSSSCG00000024621	0.246778	0.613714
ENSSSCG00000027404	-0.365456	0.614274
ENSSSCG00000048991	0.421134	0.614274
ENSSSCG00000004610	0.239837	0.614274
ENSSSCG00000005243	0.356193	0.614274
ENSSSCG00000038956	0.382968	0.614274
ENSSSCG00000033257	0.210504	0.614274
ENSSSCG00000003710	-0.234126	0.614274
ENSSSCG00000037066	0.38892	0.614274
ENSSSCG00000049334	0.410727	0.614274
ENSSSCG00000014110	0.407698	0.614274
ENSSSCG00000033363	0.392471	0.614274
ENSSSCG00000015952	-0.250639	0.614274
ENSSSCG00000026806	-0.183376	0.614274
ENSSSCG00000015555	0.25078	0.614274
ENSSSCG00000015656	0.364361	0.614274
ENSSSCG00000009197	-0.418141	0.614274
ENSSSCG00000049172	0.406308	0.614274
ENSSSCG00000034768	0.267497	0.614274
ENSSSCG00000007669	0.389808	0.614274
ENSSSCG00000039549	0.266495	0.614274
ENSSSCG00000023862	0.263854	0.614274
ENSSSCG00000012528	0.414064	0.614274
ENSSSCG00000048500	-0.402244	0.614274
ENSSSCG00000001780	-0.363812	0.614274
ENSSSCG00000021361	-0.206127	0.614274
ENSSSCG00000041146	-0.404292	0.614274
ENSSSCG00000000939	0.247016	0.614274
ENSSSCG00000000605	0.308591	0.614274
ENSSSCG00000031139	-0.356173	0.614274
ENSSSCG00000000856	0.422523	0.614274
ENSSSCG00000007198	0.419234	0.614274
ENSSSCG00000039779	-0.242962	0.614274
ENSSSCG00000017690	-0.313124	0.614274
ENSSSCG00000017693	-0.228089	0.614274
ENSSSCG00000004492	0.386299	0.61438
ENSSSCG00000046182	-0.29104	0.61438
ENSSSCG00000047541	-0.393246	0.61528
ENSSSCG00000001080	-0.156416	0.61528
ENSSSCG00000004402	0.375943	0.615299
ENSSSCG00000011604	-0.381562	0.615299
ENSSSCG00000015538	0.420992	0.615299
ENSSSCG00000028674	0.403788	0.615299
ENSSSCG00000008237	0.282156	0.615299
ENSSSCG00000031940	0.38307	0.615708
ENSSSCG00000010357	-0.174143	0.615708
ENSSSCG00000022661	0.263272	0.615937
ENSSSCG00000028840	-0.239082	0.616988
ENSSSCG00000003419	0.350596	0.617541
ENSSSCG00000044524	-0.347696	0.617541
ENSSSCG00000034754	0.420706	0.617541
ENSSSCG00000009657	-0.145809	0.617541
ENSSSCG00000025924	0.292184	0.617541
ENSSSCG00000047910	-0.316253	0.617541
ENSSSCG00000001346	-0.318455	0.617541
ENSSSCG00000041994	-0.380204	0.617541
ENSSSCG00000039333	-0.365889	0.618613
ENSSSCG00000004597	0.411251	0.618613
ENSSSCG00000011843	-0.144016	0.618613
ENSSSCG00000003236	-0.254461	0.618613
ENSSSCG00000002962	-0.262717	0.618613
ENSSSCG00000028979	-0.226849	0.618613
ENSSSCG00000008225	-0.21354	0.618613
ENSSSCG00000008459	-0.270271	0.618613
ENSSSCG00000007710	-0.392757	0.618613
ENSSSCG00000012126	0.208663	0.618613
ENSSSCG00000000176	-0.217701	0.618613
ENSSSCG00000038811	0.225297	0.618613
ENSSSCG00000039393	0.291577	0.619
ENSSSCG00000050451	-0.386452	0.619
ENSSSCG00000025744	-0.185963	0.619
ENSSSCG00000032650	0.419432	0.619
ENSSSCG00000038594	0.221815	0.619
ENSSSCG00000013894	-0.24682	0.620116
ENSSSCG00000051701	0.369685	0.620208
ENSSSCG00000009389	0.33418	0.620208
ENSSSCG00000017022	-0.207686	0.620614
ENSSSCG00000013302	0.28677	0.62098
ENSSSCG00000004201	0.399347	0.621185
ENSSSCG00000002034	-0.13603	0.621185
ENSSSCG00000001909	-0.354067	0.621185
ENSSSCG00000011171	0.337876	0.621185
ENSSSCG00000027325	-0.376826	0.622197
ENSSSCG00000013241	0.406937	0.622197
ENSSSCG00000004911	0.399342	0.622301
ENSSSCG00000002846	-0.239985	0.622301
ENSSSCG00000040349	0.412794	0.622301
ENSSSCG00000039996	-0.161475	0.622301
ENSSSCG00000021325	0.219224	0.622301
ENSSSCG00000008508	-0.257399	0.622301
ENSSSCG00000007240	0.316967	0.622301
ENSSSCG00000004558	-0.19564	0.622644
ENSSSCG00000010833	0.277278	0.622644
ENSSSCG00000018086	0.350587	0.622644
ENSSSCG00000029236	0.212545	0.622655
ENSSSCG00000049481	-0.412451	0.623209
ENSSSCG00000042502	-0.383971	0.624832
ENSSSCG00000018016	-0.194286	0.624832
ENSSSCG00000026661	-0.392361	0.624832
ENSSSCG00000002959	-0.413015	0.624847
ENSSSCG00000014292	-0.216496	0.624847
ENSSSCG00000025492	0.219187	0.624847
ENSSSCG00000029050	-0.245207	0.625336
ENSSSCG00000004620	-0.125576	0.625853
ENSSSCG00000009072	0.209739	0.625853
ENSSSCG00000001816	-0.286347	0.625853
ENSSSCG00000014838	0.289057	0.626528
ENSSSCG00000008466	0.317224	0.626528
ENSSSCG00000006764	-0.231935	0.626528
ENSSSCG00000001820	0.375146	0.626528
ENSSSCG00000009739	-0.279003	0.626566
ENSSSCG00000032067	-0.282076	0.626668
ENSSSCG00000025401	-0.41359	0.626668
ENSSSCG00000038289	0.413693	0.626668
ENSSSCG00000013399	0.222327	0.626668
ENSSSCG00000028512	-0.268737	0.626668
ENSSSCG00000007541	0.371148	0.626668
ENSSSCG00000031660	-0.399099	0.626668
ENSSSCG00000027806	-0.225648	0.626668
ENSSSCG00000016381	0.411216	0.626715
ENSSSCG00000005951	-0.276458	0.626715
ENSSSCG00000012699	0.351953	0.626715
ENSSSCG00000037534	-0.414771	0.627511
ENSSSCG00000044813	-0.414535	0.628009
ENSSSCG00000044565	0.414621	0.628216
ENSSSCG00000016721	-0.328654	0.628216
ENSSSCG00000013223	-0.202599	0.628422
ENSSSCG00000016258	-0.389198	0.628422
ENSSSCG00000040147	0.374626	0.628422
ENSSSCG00000022240	-0.227483	0.628422
ENSSSCG00000004394	-0.260208	0.629224
ENSSSCG00000001818	0.237938	0.632356
ENSSSCG00000011437	0.321235	0.634425
ENSSSCG00000030026	-0.404237	0.634425
ENSSSCG00000047157	0.41303	0.634425
ENSSSCG00000007439	0.384748	0.634425
ENSSSCG00000032153	0.369701	0.634464
ENSSSCG00000008842	0.324283	0.634464
ENSSSCG00000006001	0.319591	0.634464
ENSSSCG00000031413	-0.338681	0.634464
ENSSSCG00000014538	0.247895	0.634609
ENSSSCG00000007487	-0.230953	0.634609
ENSSSCG00000038693	-0.374725	0.634609
ENSSSCG00000004789	0.282068	0.63468
ENSSSCG00000004105	-0.322933	0.63468
ENSSSCG00000035038	-0.308948	0.63468
ENSSSCG00000004772	0.311042	0.63468
ENSSSCG00000011326	0.385645	0.63468
ENSSSCG00000024413	-0.263633	0.63468
ENSSSCG00000042332	0.41117	0.63468
ENSSSCG00000027114	0.179168	0.63468
ENSSSCG00000034174	-0.408713	0.63468
ENSSSCG00000013078	0.410307	0.63468
ENSSSCG00000013938	-0.206027	0.63468
ENSSSCG00000029059	-0.240979	0.63468
ENSSSCG00000013335	0.332784	0.63468
ENSSSCG00000022656	-0.231569	0.63468
ENSSSCG00000034976	0.215689	0.63468
ENSSSCG00000032474	-0.390819	0.63468
ENSSSCG00000022447	0.403728	0.63468
ENSSSCG00000006646	-0.231978	0.63468
ENSSSCG00000022479	-0.26771	0.63468
ENSSSCG00000012112	0.295281	0.63468
ENSSSCG00000024065	-0.229983	0.63468
ENSSSCG00000000066	-0.272369	0.63468
ENSSSCG00000024126	-0.273434	0.63468
ENSSSCG00000010896	-0.271572	0.63468
ENSSSCG00000035454	-0.153118	0.63468
ENSSSCG00000005759	-0.323637	0.63468
ENSSSCG00000025698	0.407344	0.634969
ENSSSCG00000017313	-0.389102	0.634969
ENSSSCG00000030560	0.225275	0.635262
ENSSSCG00000049462	0.377464	0.635262
ENSSSCG00000037499	0.170559	0.635262
ENSSSCG00000023173	-0.406719	0.635262
ENSSSCG00000004668	0.335544	0.635262
ENSSSCG00000025810	0.366553	0.635262
ENSSSCG00000033350	0.403885	0.635262
ENSSSCG00000037466	0.325433	0.635262
ENSSSCG00000020934	0.350512	0.635262
ENSSSCG00000015806	0.389707	0.635262
ENSSSCG00000015507	0.379018	0.635262
ENSSSCG00000024578	0.314868	0.635262
ENSSSCG00000008550	-0.358138	0.635262
ENSSSCG00000006930	0.249023	0.635262
ENSSSCG00000006115	0.230521	0.635262
ENSSSCG00000028964	-0.326035	0.635262
ENSSSCG00000029484	-0.307183	0.635262
ENSSSCG00000037561	-0.226249	0.635262
ENSSSCG00000007235	-0.3158	0.635262
ENSSSCG00000023306	-0.203824	0.635262
ENSSSCG00000017919	0.386311	0.635262
ENSSSCG00000041022	0.345783	0.635262
ENSSSCG00000037046	-0.285727	0.635262
ENSSSCG00000004261	-0.389797	0.635394
ENSSSCG00000006567	0.405934	0.635394
ENSSSCG00000002776	-0.277354	0.635621
ENSSSCG00000002829	0.379651	0.635716
ENSSSCG00000037598	-0.205703	0.635716
ENSSSCG00000008606	0.369982	0.636134
ENSSSCG00000011309	-0.291177	0.63638
ENSSSCG00000037481	0.198283	0.636713
ENSSSCG00000005222	0.401511	0.636854
ENSSSCG00000012087	-0.191628	0.636903
ENSSSCG00000008143	-0.224164	0.636903
ENSSSCG00000005358	-0.273058	0.637234
ENSSSCG00000040199	-0.13888	0.637234
ENSSSCG00000049158	0.360156	0.637234
ENSSSCG00000004144	0.179425	0.637234
ENSSSCG00000004632	0.355387	0.637234
ENSSSCG00000011618	0.40469	0.637234
ENSSSCG00000011387	0.374097	0.637234
ENSSSCG00000011806	0.404442	0.637234
ENSSSCG00000033189	0.406687	0.637234
ENSSSCG00000040575	-0.357414	0.637234
ENSSSCG00000039216	-0.357069	0.637234
ENSSSCG00000002753	-0.301529	0.637234
ENSSSCG00000039166	0.395687	0.637234
ENSSSCG00000014337	-0.216835	0.637234
ENSSSCG00000035812	-0.224305	0.637234
ENSSSCG00000014097	0.312522	0.637234
ENSSSCG00000014119	-0.183282	0.637234
ENSSSCG00000029860	0.22693	0.637234
ENSSSCG00000013647	-0.24634	0.637234
ENSSSCG00000012856	-0.218648	0.637234
ENSSSCG00000010385	0.307362	0.637234
ENSSSCG00000015924	-0.224448	0.637234
ENSSSCG00000050772	0.289895	0.637234
ENSSSCG00000015513	-0.398233	0.637234
ENSSSCG00000015346	0.278388	0.637234
ENSSSCG00000014994	0.293603	0.637234
ENSSSCG00000036488	0.243862	0.637234
ENSSSCG00000037766	0.27329	0.637234
ENSSSCG00000009113	0.146685	0.637234
ENSSSCG00000043386	-0.381871	0.637234
ENSSSCG00000007558	-0.345692	0.637234
ENSSSCG00000038520	0.326203	0.637234
ENSSSCG00000001746	-0.403822	0.637234
ENSSSCG00000001871	-0.180559	0.637234
ENSSSCG00000050831	0.353186	0.637234
ENSSSCG00000045431	0.406003	0.637234
ENSSSCG00000037609	0.405133	0.637234
ENSSSCG00000000657	0.195058	0.637234
ENSSSCG00000000277	0.400479	0.637234
ENSSSCG00000000749	-0.396691	0.637234
ENSSSCG00000009474	-0.388496	0.637234
ENSSSCG00000011046	0.294816	0.637234
ENSSSCG00000010816	0.226564	0.637234
ENSSSCG00000037431	-0.351414	0.637234
ENSSSCG00000007092	-0.213685	0.637234
ENSSSCG00000021401	-0.357577	0.637234
ENSSSCG00000040118	0.232852	0.637234
ENSSSCG00000034440	0.399218	0.637234
ENSSSCG00000017744	-0.185514	0.637234
ENSSSCG00000017476	0.214874	0.637234
ENSSSCG00000016717	-0.1906	0.637234
ENSSSCG00000025060	-0.240025	0.637234
ENSSSCG00000047835	0.325379	0.637234
ENSSSCG00000046005	0.388872	0.637234
ENSSSCG00000040833	0.358105	0.637337
ENSSSCG00000032019	0.404673	0.638695
ENSSSCG00000013585	0.300564	0.638695
ENSSSCG00000040546	0.266415	0.638867
ENSSSCG00000011218	-0.210851	0.6392
ENSSSCG00000039983	0.379748	0.6392
ENSSSCG00000001706	-0.370342	0.6392
ENSSSCG00000009503	-0.403271	0.6392
ENSSSCG00000024809	-0.36035	0.639647
ENSSSCG00000039049	0.368457	0.639692
ENSSSCG00000024841	0.404013	0.639692
ENSSSCG00000003757	-0.300603	0.640832
ENSSSCG00000012825	-0.281231	0.640849
ENSSSCG00000005291	0.282205	0.640885
ENSSSCG00000028258	0.253807	0.640885
ENSSSCG00000027275	-0.397513	0.640885
ENSSSCG00000011367	-0.127967	0.640885
ENSSSCG00000029573	-0.248522	0.640885
ENSSSCG00000021105	0.365756	0.640885
ENSSSCG00000040919	0.396677	0.640885
ENSSSCG00000035069	0.298887	0.640885
ENSSSCG00000012859	-0.278947	0.640885
ENSSSCG00000010719	-0.313313	0.640885
ENSSSCG00000046272	-0.403042	0.640885
ENSSSCG00000040562	-0.344727	0.640885
ENSSSCG00000022396	0.247897	0.640885
ENSSSCG00000012328	-0.242413	0.640885
ENSSSCG00000001703	-0.262552	0.640885
ENSSSCG00000024377	0.16274	0.640885
ENSSSCG00000029571	-0.37384	0.640885
ENSSSCG00000036438	0.402746	0.640885
ENSSSCG00000026744	-0.190341	0.640885
ENSSSCG00000031288	0.310994	0.640885
ENSSSCG00000017613	0.191267	0.640885
ENSSSCG00000017877	-0.147208	0.640885
ENSSSCG00000021738	-0.173893	0.641473
ENSSSCG00000034502	0.280189	0.641497
ENSSSCG00000032228	0.3882	0.641497
ENSSSCG00000001436	0.347821	0.641497
ENSSSCG00000011874	-0.269958	0.642919
ENSSSCG00000012913	-0.306537	0.642919
ENSSSCG00000014184	0.240818	0.642919
ENSSSCG00000048202	-0.348863	0.642919
ENSSSCG00000008009	0.237166	0.642919
ENSSSCG00000006038	0.250404	0.642919
ENSSSCG00000006510	-0.173404	0.643799
ENSSSCG00000017682	-0.286285	0.643799
ENSSSCG00000025329	-0.351099	0.644069
ENSSSCG00000028010	-0.260365	0.64455
ENSSSCG00000014008	0.369485	0.64455
[truncated: 29,909 more rows]
