# Supplementary material for: Transcriptomic Analysis of Liver Indicates Novel Vaccine to Porcine Reproductive and Respiratory Virus Promotes Homeostasis in T-Cell and Inflammatory Immune Responses Compared to a Commercial Vaccine in Pigs
Source: Front Vet Sci. 2022 Mar 24;9:791034. doi: 10.3389/fvets.2022.791034 (PMC8987227; doi:10.3389/fvets.2022.791034)
Supplement: Supplementary Table 2 — MLV-ATP differentially expressed gene list. [file Table_2.XLSX]

## Sheet: MLV-ATP vs sham-prrsv
GENE	LOG2FC	FDR (B&H)
ENSSSCG00000046134	1.52567	8.32949e-07
ENSSSCG00000011713	1.15848	4.33459e-06
ENSSSCG00000016160	0.941187	4.33459e-06
ENSSSCG00000031640	1.08265	4.86451e-06
ENSSSCG00000002847	-1.3357	9.15437e-06
ENSSSCG00000022649	-1.03348	1.17469e-05
ENSSSCG00000009881	-1.07495	1.35552e-05
ENSSSCG00000035297	-1.13355	1.41889e-05
ENSSSCG00000034973	0.862801	1.66057e-05
ENSSSCG00000016230	-0.848484	1.66057e-05
ENSSSCG00000040275	1.10469	1.66057e-05
ENSSSCG00000050256	-0.781816	1.80071e-05
ENSSSCG00000038706	1.04658	2.0521e-05
ENSSSCG00000002516	-0.813108	3.81037e-05
ENSSSCG00000032996	-1.1302	4.68807e-05
ENSSSCG00000015412	1.25032	7.07263e-05
ENSSSCG00000016857	0.941286	8.10283e-05
ENSSSCG00000000774	-1.06212	8.45864e-05
ENSSSCG00000015662	1.20964	0.000115566
ENSSSCG00000036208	-1.04678	0.000143782
ENSSSCG00000011133	-0.507667	0.000147106
ENSSSCG00000037572	-0.83774	0.000205466
ENSSSCG00000021977	0.744063	0.000235122
ENSSSCG00000023379	-0.970636	0.00035071
ENSSSCG00000006979	1.10933	0.00035071
ENSSSCG00000044280	0.941855	0.000405965
ENSSSCG00000035170	1.1318	0.000413233
ENSSSCG00000031595	-1.10114	0.000430403
ENSSSCG00000009543	-0.909395	0.000430403
ENSSSCG00000008842	0.773409	0.000479722
ENSSSCG00000003848	-0.576348	0.000603078
ENSSSCG00000006183	1.04687	0.000676931
ENSSSCG00000005400	1.02316	0.000776557
ENSSSCG00000017258	1.00678	0.000776557
ENSSSCG00000002868	0.734032	0.000836218
ENSSSCG00000000857	1.06745	0.000836218
ENSSSCG00000036033	0.714848	0.000877993
ENSSSCG00000005502	0.850666	0.00100235
ENSSSCG00000011579	0.949065	0.00103695
ENSSSCG00000009720	-0.816018	0.00103695
ENSSSCG00000000854	0.782084	0.00103695
ENSSSCG00000008068	-0.47792	0.00115176
ENSSSCG00000009268	-0.452155	0.00115309
ENSSSCG00000012300	-0.934838	0.0013735
ENSSSCG00000016002	0.999152	0.00153597
ENSSSCG00000002652	-0.48343	0.00171111
ENSSSCG00000040631	0.964273	0.00187595
ENSSSCG00000004830	-0.734946	0.00197071
ENSSSCG00000028691	0.971455	0.00197071
ENSSSCG00000001025	1.0059	0.00197071
ENSSSCG00000035058	0.834104	0.00198487
ENSSSCG00000015340	-0.611554	0.00204031
ENSSSCG00000008250	0.898219	0.00204993
ENSSSCG00000021712	-0.77586	0.00206059
ENSSSCG00000033996	-1.03941	0.00207043
ENSSSCG00000020402	0.619926	0.00240659
ENSSSCG00000007146	0.939795	0.00250125
ENSSSCG00000004547	0.617418	0.00279649
ENSSSCG00000007145	-0.928362	0.00283657
ENSSSCG00000001912	-0.52986	0.00292849
ENSSSCG00000022849	-0.664296	0.00337456
ENSSSCG00000034827	0.656818	0.00339397
ENSSSCG00000017416	-0.929173	0.00339397
ENSSSCG00000022569	0.801197	0.0035622
ENSSSCG00000031207	-1.00198	0.0035924
ENSSSCG00000030108	-0.710916	0.0035924
ENSSSCG00000023014	0.885078	0.0035924
ENSSSCG00000045382	0.940508	0.00361955
ENSSSCG00000006309	-0.435857	0.00388666
ENSSSCG00000004092	-0.764712	0.00397471
ENSSSCG00000017956	0.8734	0.00398618
ENSSSCG00000023328	0.657383	0.00409977
ENSSSCG00000008496	-0.663441	0.00414122
ENSSSCG00000040575	-0.942756	0.00435633
ENSSSCG00000005287	-0.977534	0.0044091
ENSSSCG00000041847	0.984118	0.0044091
ENSSSCG00000038801	0.851232	0.00447446
ENSSSCG00000023333	0.764933	0.00554636
ENSSSCG00000013074	0.90211	0.00623029
ENSSSCG00000003763	-0.750123	0.00624607
ENSSSCG00000040607	0.573565	0.00633342
ENSSSCG00000015037	0.666308	0.00633342
ENSSSCG00000033089	-0.640608	0.00633342
ENSSSCG00000027447	-0.470643	0.00633342
ENSSSCG00000040016	0.724457	0.00649531
ENSSSCG00000017144	-0.946922	0.00657172
ENSSSCG00000007469	-0.325353	0.00658807
ENSSSCG00000050616	-0.883373	0.00674456
ENSSSCG00000017062	0.924587	0.00679461
ENSSSCG00000001137	-0.762045	0.00702966
ENSSSCG00000011208	0.72064	0.0072467
ENSSSCG00000013303	-0.603617	0.00739461
ENSSSCG00000027157	0.929587	0.00743641
ENSSSCG00000011874	-0.55089	0.00763535
ENSSSCG00000033613	-0.690561	0.00763535
ENSSSCG00000032116	-0.878478	0.00763535
ENSSSCG00000009873	-0.616029	0.00805176
ENSSSCG00000011131	-0.630409	0.00805176
ENSSSCG00000007058	0.570058	0.00810254
ENSSSCG00000027434	0.8318	0.00821905
ENSSSCG00000014011	-0.826803	0.00823223
ENSSSCG00000014149	0.507824	0.00823223
ENSSSCG00000040681	0.913791	0.00852209
ENSSSCG00000007067	0.694329	0.00852209
ENSSSCG00000023229	0.871753	0.0102567
ENSSSCG00000004166	-0.455794	0.0103047
ENSSSCG00000010452	-0.794456	0.0103047
ENSSSCG00000021229	0.512447	0.0106617
ENSSSCG00000010926	0.860155	0.0106617
ENSSSCG00000009676	0.456175	0.0107621
ENSSSCG00000004779	-0.713274	0.011296
ENSSSCG00000015632	0.83931	0.0116836
ENSSSCG00000009468	0.699982	0.0116836
ENSSSCG00000013307	0.860937	0.0122796
ENSSSCG00000012857	-0.639678	0.0122796
ENSSSCG00000006009	-0.328226	0.0136544
ENSSSCG00000027709	-0.66139	0.0136913
ENSSSCG00000040956	0.795064	0.0137178
ENSSSCG00000016929	0.453679	0.0145262
ENSSSCG00000025027	-0.670293	0.0156058
ENSSSCG00000008853	0.712176	0.0160569
ENSSSCG00000025996	-0.684559	0.0160569
ENSSSCG00000026453	0.884574	0.0162218
ENSSSCG00000006717	-0.83552	0.0162218
ENSSSCG00000037682	0.870403	0.0162218
ENSSSCG00000048240	-0.582806	0.017241
ENSSSCG00000004149	0.494083	0.017241
ENSSSCG00000031106	-0.667195	0.017241
ENSSSCG00000041545	0.839725	0.017241
ENSSSCG00000036669	0.646163	0.017241
ENSSSCG00000023746	0.71041	0.017241
ENSSSCG00000015810	0.780181	0.017241
ENSSSCG00000015083	0.570902	0.017241
ENSSSCG00000028359	0.876204	0.017241
ENSSSCG00000035736	0.792782	0.017241
ENSSSCG00000005103	-0.580415	0.0173164
ENSSSCG00000050815	0.830469	0.0174203
ENSSSCG00000001099	0.347055	0.0174239
ENSSSCG00000034570	-0.820548	0.0175376
ENSSSCG00000023604	-0.540727	0.0175376
ENSSSCG00000000633	-0.561714	0.0175376
ENSSSCG00000016663	0.872639	0.0175376
ENSSSCG00000032019	0.685107	0.0176006
ENSSSCG00000032769	-0.869637	0.0176006
ENSSSCG00000000549	0.46346	0.0176006
ENSSSCG00000005284	0.673575	0.0181813
ENSSSCG00000009202	0.780247	0.0181813
ENSSSCG00000001507	-0.541884	0.0184433
ENSSSCG00000038521	-0.762601	0.0185069
ENSSSCG00000017791	-0.56709	0.0185069
ENSSSCG00000012914	-0.786947	0.0185794
ENSSSCG00000012686	-0.431945	0.0187766
ENSSSCG00000012076	-0.793923	0.0196939
ENSSSCG00000015271	0.800145	0.0196939
ENSSSCG00000051070	-0.837334	0.0196939
ENSSSCG00000006835	-0.611502	0.0196939
ENSSSCG00000002032	0.79199	0.0196939
ENSSSCG00000048004	0.852951	0.0196939
ENSSSCG00000009040	0.510545	0.0197463
ENSSSCG00000005305	0.691075	0.0201225
ENSSSCG00000016677	-0.628635	0.0201225
ENSSSCG00000035420	-0.845119	0.0215763
ENSSSCG00000012077	-0.814007	0.0219497
ENSSSCG00000041103	-0.603387	0.0219497
ENSSSCG00000015405	0.724734	0.0219954
ENSSSCG00000029371	0.572163	0.0223881
ENSSSCG00000047868	-0.837764	0.0233027
ENSSSCG00000047883	-0.843971	0.0241343
ENSSSCG00000032786	-0.826623	0.0246257
ENSSSCG00000030305	0.600042	0.0254531
ENSSSCG00000010826	0.783862	0.0267292
ENSSSCG00000022073	0.486396	0.0269382
ENSSSCG00000042331	0.800519	0.0269892
ENSSSCG00000015526	0.774095	0.027055
ENSSSCG00000029438	-0.737709	0.0271108
ENSSSCG00000007508	-0.742916	0.0271108
ENSSSCG00000000573	0.618101	0.0275537
ENSSSCG00000027110	-0.657579	0.0286674
ENSSSCG00000010959	0.69177	0.0287113
ENSSSCG00000014851	0.440183	0.0293145
ENSSSCG00000008550	-0.77304	0.0299611
ENSSSCG00000016512	-0.393753	0.0299611
ENSSSCG00000029249	-0.531264	0.0302181
ENSSSCG00000039514	0.66701	0.0306903
ENSSSCG00000029281	0.601959	0.0306903
ENSSSCG00000035189	0.71141	0.0308297
ENSSSCG00000028942	0.736095	0.0309606
ENSSSCG00000050251	0.656272	0.0309621
ENSSSCG00000037319	-0.678604	0.0315405
ENSSSCG00000030548	-0.819304	0.0315405
ENSSSCG00000000732	-0.523879	0.0319816
ENSSSCG00000023171	0.504779	0.0353711
ENSSSCG00000039862	-0.71458	0.0353711
ENSSSCG00000007281	0.762467	0.0353711
ENSSSCG00000004136	-0.439628	0.0357067
ENSSSCG00000021208	0.556916	0.0358321
ENSSSCG00000008647	-0.61895	0.0364382
ENSSSCG00000000688	-0.784161	0.0364753
ENSSSCG00000032674	-0.755742	0.0364893
ENSSSCG00000015444	0.52612	0.0379548
ENSSSCG00000040847	-0.445215	0.0390713
ENSSSCG00000006143	0.586409	0.0391445
ENSSSCG00000022692	-0.483221	0.0402123
ENSSSCG00000025704	-0.465539	0.0402123
ENSSSCG00000000687	-0.489791	0.0413746
ENSSSCG00000030253	-0.493691	0.0418625
ENSSSCG00000027275	-0.789202	0.0421466
ENSSSCG00000039875	-0.610787	0.0421466
ENSSSCG00000012856	-0.464215	0.0421466
ENSSSCG00000015556	0.659133	0.0421466
ENSSSCG00000016618	0.694949	0.0421466
ENSSSCG00000004597	0.786062	0.0423891
ENSSSCG00000003722	0.659165	0.0426621
ENSSSCG00000032896	0.740704	0.0431873
ENSSSCG00000032094	0.608485	0.0438565
ENSSSCG00000001427	-0.449135	0.0450498
ENSSSCG00000024111	-0.7813	0.0455042
ENSSSCG00000006893	0.4017	0.0460863
ENSSSCG00000013551	-0.555739	0.0460897
ENSSSCG00000025986	-0.760613	0.0470213
ENSSSCG00000012620	-0.582108	0.0487195
ENSSSCG00000051231	-0.768899	0.0487226
ENSSSCG00000033512	0.756656	0.0491817
ENSSSCG00000049043	0.722892	0.0494196
ENSSSCG00000016732	-0.501472	0.0511568
ENSSSCG00000036776	0.680049	0.0514987
ENSSSCG00000008648	-0.769036	0.0516912
ENSSSCG00000037732	-0.408829	0.0516912
ENSSSCG00000005455	0.668337	0.0517089
ENSSSCG00000040977	0.533816	0.0517089
ENSSSCG00000030371	-0.752103	0.0517089
ENSSSCG00000001868	0.389275	0.0517089
ENSSSCG00000008606	0.722029	0.0518569
ENSSSCG00000001554	-0.321271	0.0526713
ENSSSCG00000004657	-0.444248	0.0528341
ENSSSCG00000011277	0.743883	0.0528341
ENSSSCG00000029227	0.50806	0.0528341
ENSSSCG00000025582	0.6685	0.0528341
ENSSSCG00000013115	-0.533845	0.0538116
ENSSSCG00000023785	-0.457791	0.0551654
ENSSSCG00000010604	0.523682	0.0551758
ENSSSCG00000024975	0.562855	0.0551758
ENSSSCG00000001061	-0.393591	0.0554335
ENSSSCG00000017268	-0.44116	0.0557197
ENSSSCG00000040140	-0.47095	0.0563278
ENSSSCG00000017018	0.67363	0.0563278
ENSSSCG00000047073	-0.488155	0.0573629
ENSSSCG00000003760	0.621364	0.0580861
ENSSSCG00000037609	0.760131	0.0613506
ENSSSCG00000009692	-0.400555	0.0615098
ENSSSCG00000025186	-0.50043	0.0617462
ENSSSCG00000010599	-0.482679	0.0617462
ENSSSCG00000011885	0.730813	0.061965
ENSSSCG00000006970	0.452463	0.0628234
ENSSSCG00000011443	0.670636	0.0629745
ENSSSCG00000048729	0.715059	0.064575
ENSSSCG00000031819	0.456753	0.0650538
ENSSSCG00000039332	0.689741	0.065226
ENSSSCG00000000540	-0.686469	0.065226
ENSSSCG00000003718	-0.431792	0.065521
ENSSSCG00000016243	-0.372261	0.065521
ENSSSCG00000046777	0.74302	0.065521
ENSSSCG00000012479	0.543247	0.065521
ENSSSCG00000009817	0.555048	0.0655794
ENSSSCG00000002433	0.603489	0.0656871
ENSSSCG00000022676	0.487969	0.0657426
ENSSSCG00000042706	0.611819	0.0667161
ENSSSCG00000031918	-0.646806	0.0667161
ENSSSCG00000021271	-0.746393	0.0673938
ENSSSCG00000027127	-0.380797	0.0675025
ENSSSCG00000031905	0.747973	0.0675025
ENSSSCG00000027144	0.567567	0.0676504
ENSSSCG00000044381	-0.745801	0.0678092
ENSSSCG00000021569	-0.602549	0.0683887
ENSSSCG00000040411	-0.41125	0.069128
ENSSSCG00000007501	-0.743268	0.069128
ENSSSCG00000050255	0.732589	0.0696714
ENSSSCG00000009975	0.643152	0.0699274
ENSSSCG00000010948	0.711524	0.0699274
ENSSSCG00000038963	-0.465045	0.0702249
ENSSSCG00000022196	-0.740834	0.0721018
ENSSSCG00000000802	-0.709912	0.0721143
ENSSSCG00000023376	0.626097	0.0734234
ENSSSCG00000030246	0.706633	0.07392
ENSSSCG00000012055	-0.507022	0.0751686
ENSSSCG00000016017	0.467426	0.0751686
ENSSSCG00000038933	0.475359	0.0751686
ENSSSCG00000045321	-0.699858	0.0751686
ENSSSCG00000023630	0.559879	0.0751686
ENSSSCG00000005759	-0.643585	0.0751686
ENSSSCG00000004646	-0.588826	0.0753583
ENSSSCG00000036618	0.690938	0.0760078
ENSSSCG00000017104	-0.438238	0.0760078
ENSSSCG00000049339	-0.561985	0.0760078
ENSSSCG00000046155	0.589904	0.0765221
ENSSSCG00000042913	0.73104	0.077713
ENSSSCG00000014450	-0.38476	0.0780546
ENSSSCG00000015747	0.690047	0.0790542
ENSSSCG00000000982	-0.723822	0.0801027
ENSSSCG00000016817	-0.475949	0.0808037
ENSSSCG00000006887	0.554234	0.0821985
ENSSSCG00000039007	0.5922	0.0832278
ENSSSCG00000004402	0.627967	0.083303
ENSSSCG00000036822	0.521809	0.0835535
ENSSSCG00000014369	0.653216	0.0836729
ENSSSCG00000036144	0.657991	0.0836729
ENSSSCG00000016053	-0.468602	0.0836729
ENSSSCG00000035195	0.522115	0.0836729
ENSSSCG00000037846	-0.602237	0.0836729
ENSSSCG00000037669	-0.665469	0.0836729
ENSSSCG00000007083	0.709546	0.0836729
ENSSSCG00000034993	0.62596	0.0841149
ENSSSCG00000009753	0.678505	0.0841149
ENSSSCG00000010160	-0.351225	0.0841149
ENSSSCG00000015256	0.500034	0.0841149
ENSSSCG00000042668	0.694373	0.0841149
ENSSSCG00000024480	-0.463334	0.0841149
ENSSSCG00000017095	-0.436309	0.0855499
ENSSSCG00000027860	-0.368883	0.0857987
ENSSSCG00000014800	-0.625035	0.0859234
ENSSSCG00000037898	0.524541	0.0869168
ENSSSCG00000025403	0.624897	0.0872229
ENSSSCG00000011928	0.482747	0.0875231
ENSSSCG00000047315	0.603291	0.0876803
ENSSSCG00000038138	-0.447792	0.0876803
ENSSSCG00000007816	-0.348128	0.0892515
ENSSSCG00000005425	0.521064	0.0894824
ENSSSCG00000008468	0.489422	0.0894824
ENSSSCG00000002507	-0.409133	0.0894824
ENSSSCG00000037105	-0.393379	0.0894824
ENSSSCG00000007383	0.590496	0.0894824
ENSSSCG00000001516	-0.620017	0.090202
ENSSSCG00000002777	0.644777	0.0902315
ENSSSCG00000046745	-0.708665	0.0902315
ENSSSCG00000039272	0.637469	0.0902315
ENSSSCG00000011239	-0.426808	0.0919341
ENSSSCG00000007247	-0.544012	0.0919341
ENSSSCG00000039568	0.706732	0.0938575
ENSSSCG00000005641	0.604466	0.094758
ENSSSCG00000031261	0.35114	0.094758
ENSSSCG00000034154	-0.517663	0.094758
ENSSSCG00000038650	-0.709287	0.094758
ENSSSCG00000016665	0.382503	0.094758
ENSSSCG00000013304	-0.415213	0.0954759
ENSSSCG00000020803	0.512109	0.0956643
ENSSSCG00000001049	-0.294785	0.0958283
ENSSSCG00000017146	-0.657366	0.0965554
ENSSSCG00000011101	0.294485	0.0968858
ENSSSCG00000021206	-0.47724	0.0975511
ENSSSCG00000031780	0.399001	0.0975511
ENSSSCG00000004484	0.542835	0.0979137
ENSSSCG00000029096	0.54746	0.0979137
ENSSSCG00000034723	-0.661557	0.0979137
ENSSSCG00000037051	-0.690334	0.0983143
ENSSSCG00000016233	0.564787	0.0983143
ENSSSCG00000037106	0.694059	0.0983143
ENSSSCG00000022915	-0.338238	0.0983143
ENSSSCG00000030277	-0.460143	0.0989099
ENSSSCG00000005227	-0.338328	0.0992634
ENSSSCG00000006678	-0.686826	0.0994452
ENSSSCG00000050110	-0.684844	0.0999119
ENSSSCG00000000837	-0.377543	0.0999119
ENSSSCG00000037910	0.587875	0.100886
ENSSSCG00000005102	-0.551279	0.100931
ENSSSCG00000031903	-0.552603	0.102483
ENSSSCG00000033392	-0.509679	0.102802
ENSSSCG00000004847	-0.367271	0.102962
ENSSSCG00000022299	0.399426	0.102962
ENSSSCG00000014972	0.348994	0.102962
ENSSSCG00000007248	-0.311401	0.102962
ENSSSCG00000034259	0.452764	0.102962
ENSSSCG00000002267	0.625947	0.104098
ENSSSCG00000009519	-0.445561	0.104098
ENSSSCG00000003690	0.600662	0.104306
ENSSSCG00000000386	-0.452854	0.104306
ENSSSCG00000008261	-0.572651	0.10478
ENSSSCG00000000791	0.639283	0.105515
ENSSSCG00000038694	-0.474002	0.106637
ENSSSCG00000024671	0.689862	0.107194
ENSSSCG00000004672	0.666654	0.107325
ENSSSCG00000039271	0.672473	0.107325
ENSSSCG00000005994	-0.361833	0.108166
ENSSSCG00000012087	-0.376254	0.108266
ENSSSCG00000039194	0.494687	0.108266
ENSSSCG00000035419	-0.484821	0.108266
ENSSSCG00000046885	-0.676471	0.108266
ENSSSCG00000028740	0.482965	0.108848
ENSSSCG00000010703	-0.43552	0.110062
ENSSSCG00000022345	0.446684	0.110364
ENSSSCG00000029808	-0.376651	0.111958
ENSSSCG00000046005	0.650598	0.111958
ENSSSCG00000005030	0.569432	0.111972
ENSSSCG00000035038	-0.543673	0.11223
ENSSSCG00000039874	0.633603	0.11223
ENSSSCG00000023503	0.559359	0.112587
ENSSSCG00000026894	-0.45461	0.112587
ENSSSCG00000040752	-0.593227	0.114031
ENSSSCG00000038005	-0.662717	0.115045
ENSSSCG00000015426	0.59879	0.115384
ENSSSCG00000006199	0.512431	0.115384
ENSSSCG00000039222	0.554142	0.115384
ENSSSCG00000038308	-0.420662	0.116741
ENSSSCG00000015357	0.387791	0.116741
ENSSSCG00000034039	-0.385388	0.117551
ENSSSCG00000010247	-0.371897	0.118293
ENSSSCG00000003277	-0.605395	0.11942
ENSSSCG00000032188	-0.596204	0.11942
ENSSSCG00000033185	0.44881	0.120219
ENSSSCG00000008974	-0.319737	0.120219
ENSSSCG00000035956	0.522393	0.120219
ENSSSCG00000004939	0.59119	0.120279
ENSSSCG00000037652	-0.670985	0.120279
ENSSSCG00000011145	-0.477885	0.120279
ENSSSCG00000012362	0.495626	0.120418
ENSSSCG00000015618	0.635588	0.121503
ENSSSCG00000048322	-0.506343	0.121503
ENSSSCG00000001793	0.584018	0.121622
ENSSSCG00000008230	0.582188	0.121676
ENSSSCG00000014835	-0.317489	0.123409
ENSSSCG00000015579	-0.60352	0.124351
ENSSSCG00000036074	0.409733	0.125029
ENSSSCG00000039867	-0.374439	0.125783
ENSSSCG00000038038	-0.3793	0.126216
ENSSSCG00000012828	0.54822	0.126216
ENSSSCG00000033919	-0.38798	0.126216
ENSSSCG00000025744	-0.351559	0.126302
ENSSSCG00000035089	-0.644017	0.126302
ENSSSCG00000040386	-0.501226	0.12715
ENSSSCG00000022448	0.642438	0.127237
ENSSSCG00000012027	0.607825	0.127981
ENSSSCG00000021374	0.583564	0.127981
ENSSSCG00000051156	0.588055	0.128143
ENSSSCG00000040162	-0.616618	0.128143
ENSSSCG00000006001	0.452441	0.128143
ENSSSCG00000013579	0.555619	0.12891
ENSSSCG00000026455	-0.662755	0.128922
ENSSSCG00000015726	0.606464	0.130794
ENSSSCG00000032702	0.662481	0.131612
ENSSSCG00000004602	0.45697	0.132056
ENSSSCG00000013381	-0.665909	0.132056
ENSSSCG00000006395	-0.583656	0.132056
ENSSSCG00000005662	-0.486009	0.132433
ENSSSCG00000001131	0.554073	0.132433
ENSSSCG00000009475	-0.556328	0.132433
ENSSSCG00000016426	-0.499354	0.132433
ENSSSCG00000004918	-0.382967	0.132933
ENSSSCG00000039426	0.53908	0.132933
ENSSSCG00000015815	0.472509	0.132933
ENSSSCG00000014224	0.538259	0.13391
ENSSSCG00000010652	0.372072	0.134437
ENSSSCG00000002540	-0.350623	0.134745
ENSSSCG00000011970	-0.282396	0.135645
ENSSSCG00000012853	-0.656169	0.136074
ENSSSCG00000002005	-0.636314	0.136074
ENSSSCG00000051497	0.656803	0.136167
ENSSSCG00000045508	-0.438364	0.136618
ENSSSCG00000026478	0.614123	0.136618
ENSSSCG00000037764	-0.595155	0.136618
ENSSSCG00000027287	-0.393833	0.138084
ENSSSCG00000022506	-0.446784	0.139667
ENSSSCG00000036679	0.481078	0.139667
ENSSSCG00000000660	0.656916	0.139667
ENSSSCG00000033222	-0.412025	0.139673
ENSSSCG00000015716	0.598094	0.139673
ENSSSCG00000033982	-0.501581	0.140133
ENSSSCG00000036149	-0.657603	0.140241
ENSSSCG00000024800	0.644834	0.140447
ENSSSCG00000007198	0.654434	0.141291
ENSSSCG00000005503	0.544585	0.141476
ENSSSCG00000004254	0.507513	0.141476
ENSSSCG00000014316	0.447291	0.141476
ENSSSCG00000031337	0.350911	0.141476
ENSSSCG00000036444	-0.57584	0.141476
ENSSSCG00000051734	0.655788	0.141619
ENSSSCG00000011690	0.539694	0.141835
ENSSSCG00000007052	-0.575986	0.141835
ENSSSCG00000025243	0.469746	0.141949
ENSSSCG00000012909	-0.534429	0.14284
ENSSSCG00000026617	-0.498562	0.14284
ENSSSCG00000033199	0.653785	0.142948
ENSSSCG00000042455	-0.599236	0.142948
ENSSSCG00000022986	0.36251	0.142948
ENSSSCG00000001068	0.651539	0.142948
ENSSSCG00000024377	0.28857	0.142948
ENSSSCG00000001100	0.436575	0.142948
ENSSSCG00000027070	-0.538932	0.142948
ENSSSCG00000007438	0.319248	0.142948
ENSSSCG00000029990	-0.580055	0.142948
ENSSSCG00000008773	-0.48267	0.144095
ENSSSCG00000048500	-0.637623	0.144095
ENSSSCG00000037541	-0.538735	0.144095
ENSSSCG00000011038	0.639686	0.144348
ENSSSCG00000005649	-0.46371	0.144874
ENSSSCG00000011822	-0.322379	0.144874
ENSSSCG00000015897	-0.449967	0.144874
ENSSSCG00000029813	-0.461688	0.144874
ENSSSCG00000028964	-0.57406	0.144874
ENSSSCG00000017376	0.608761	0.144874
ENSSSCG00000025005	0.592298	0.145259
ENSSSCG00000024494	-0.399366	0.145352
ENSSSCG00000004795	0.4092	0.146032
ENSSSCG00000033189	0.648785	0.146032
ENSSSCG00000013745	-0.475882	0.146032
ENSSSCG00000009842	0.647155	0.146032
ENSSSCG00000015144	-0.402338	0.146032
ENSSSCG00000024614	0.490982	0.150453
ENSSSCG00000024872	-0.630848	0.150739
ENSSSCG00000025203	-0.424775	0.150748
ENSSSCG00000027778	0.420848	0.150748
ENSSSCG00000009429	0.456024	0.151372
ENSSSCG00000004487	-0.377988	0.152436
ENSSSCG00000004081	0.389145	0.152506
ENSSSCG00000033352	0.637364	0.152506
ENSSSCG00000017406	-0.36461	0.153287
ENSSSCG00000033546	-0.620013	0.15353
ENSSSCG00000002436	0.434014	0.153552
ENSSSCG00000039541	-0.358918	0.153592
ENSSSCG00000001233	-0.345725	0.153592
ENSSSCG00000023396	-0.564158	0.154073
ENSSSCG00000032573	-0.538034	0.154073
ENSSSCG00000001520	-0.35655	0.155115
ENSSSCG00000039761	0.623798	0.155729
ENSSSCG00000012262	-0.452373	0.155729
ENSSSCG00000042312	-0.596275	0.15634
ENSSSCG00000041187	0.631866	0.156812
ENSSSCG00000037066	0.488778	0.157791
ENSSSCG00000003161	0.566423	0.158146
ENSSSCG00000013933	-0.52399	0.158436
ENSSSCG00000008372	-0.288896	0.158436
ENSSSCG00000037241	0.410499	0.15877
ENSSSCG00000028558	0.348561	0.159555
ENSSSCG00000016902	-0.609721	0.159868
ENSSSCG00000022630	-0.612562	0.160989
ENSSSCG00000009921	-0.631792	0.161339
ENSSSCG00000014933	0.622737	0.161339
ENSSSCG00000024960	0.453962	0.161339
ENSSSCG00000037445	-0.335232	0.161339
ENSSSCG00000037532	-0.433943	0.161339
ENSSSCG00000006572	0.561307	0.161339
ENSSSCG00000008867	0.423141	0.162226
ENSSSCG00000006059	-0.387457	0.162252
ENSSSCG00000003386	0.509357	0.16422
ENSSSCG00000015085	0.407585	0.16422
ENSSSCG00000023539	0.548653	0.16422
ENSSSCG00000022989	0.42572	0.16422
ENSSSCG00000013737	-0.580261	0.16464
ENSSSCG00000017752	0.390324	0.165446
ENSSSCG00000034178	0.587483	0.165719
ENSSSCG00000002294	-0.619309	0.165719
ENSSSCG00000038067	-0.612779	0.16605
ENSSSCG00000031831	0.512591	0.166066
ENSSSCG00000010336	-0.578447	0.169657
ENSSSCG00000035456	-0.571974	0.169657
ENSSSCG00000027525	-0.479223	0.170027
ENSSSCG00000025795	-0.622483	0.170906
ENSSSCG00000003854	0.533396	0.171017
ENSSSCG00000003331	-0.615695	0.171017
ENSSSCG00000013111	-0.425454	0.171017
ENSSSCG00000016129	0.6268	0.171017
ENSSSCG00000038351	-0.606424	0.171484
ENSSSCG00000014600	-0.485763	0.17199
ENSSSCG00000028983	-0.292833	0.17199
ENSSSCG00000028889	-0.424598	0.173019
ENSSSCG00000008386	-0.423353	0.173019
ENSSSCG00000007748	-0.607702	0.173024
ENSSSCG00000010429	0.431932	0.173122
ENSSSCG00000015315	0.445191	0.174044
ENSSSCG00000039522	0.621961	0.174044
ENSSSCG00000021815	-0.315651	0.174589
ENSSSCG00000020701	0.53487	0.175532
ENSSSCG00000040334	0.416473	0.175532
ENSSSCG00000029538	-0.324307	0.175577
ENSSSCG00000022301	-0.453545	0.176145
ENSSSCG00000001612	-0.624104	0.176145
ENSSSCG00000008444	-0.324447	0.178943
ENSSSCG00000028978	-0.548294	0.178943
ENSSSCG00000021647	0.547306	0.178943
ENSSSCG00000040377	0.477468	0.179241
ENSSSCG00000029763	-0.447159	0.179599
ENSSSCG00000005920	-0.543308	0.180305
ENSSSCG00000025770	0.338897	0.180469
ENSSSCG00000038202	-0.422146	0.180543
ENSSSCG00000011635	-0.570165	0.181359
ENSSSCG00000035839	-0.306059	0.181359
ENSSSCG00000040887	-0.218982	0.18145
ENSSSCG00000026618	0.528468	0.18145
ENSSSCG00000016130	0.608511	0.18145
ENSSSCG00000003178	-0.43075	0.181654
ENSSSCG00000014061	0.451458	0.181654
ENSSSCG00000006335	0.556314	0.181654
ENSSSCG00000001882	0.595281	0.181654
ENSSSCG00000000457	-0.248941	0.181654
ENSSSCG00000027676	-0.395411	0.181654
ENSSSCG00000003973	-0.453659	0.182787
ENSSSCG00000009240	-0.408331	0.183612
ENSSSCG00000027765	0.289529	0.184579
ENSSSCG00000032007	0.320958	0.184579
ENSSSCG00000022309	0.580156	0.184579
ENSSSCG00000024622	-0.516671	0.184956
ENSSSCG00000003187	0.404146	0.184956
ENSSSCG00000010142	0.580388	0.184956
ENSSSCG00000009650	-0.423643	0.184956
ENSSSCG00000040172	0.52518	0.184956
ENSSSCG00000015268	0.586627	0.184956
ENSSSCG00000009290	-0.354846	0.184956
ENSSSCG00000050813	0.418258	0.185224
ENSSSCG00000008237	0.416768	0.185625
ENSSSCG00000023666	0.448081	0.18654
ENSSSCG00000032017	0.502066	0.18654
ENSSSCG00000039175	0.346905	0.18654
ENSSSCG00000040535	-0.535973	0.18654
ENSSSCG00000017665	0.312635	0.18654
ENSSSCG00000007034	0.607444	0.187573
ENSSSCG00000016634	0.514148	0.188338
ENSSSCG00000005106	0.517914	0.188374
ENSSSCG00000036352	0.510037	0.189563
ENSSSCG00000004390	0.282561	0.191297
ENSSSCG00000006736	-0.422092	0.191297
ENSSSCG00000004233	0.609749	0.191333
ENSSSCG00000012022	0.358996	0.191333
ENSSSCG00000021105	0.482356	0.191333
ENSSSCG00000051171	0.523381	0.191333
ENSSSCG00000013777	-0.454083	0.191333
ENSSSCG00000021805	0.598446	0.191333
ENSSSCG00000014921	0.566078	0.191333
ENSSSCG00000030801	-0.426208	0.191333
ENSSSCG00000037449	0.555869	0.191333
ENSSSCG00000025423	-0.49706	0.191333
ENSSSCG00000007140	0.464668	0.191333
ENSSSCG00000013766	-0.318121	0.19334
ENSSSCG00000037723	0.486708	0.194247
ENSSSCG00000009373	-0.502206	0.194247
ENSSSCG00000009083	0.40869	0.194357
ENSSSCG00000003377	-0.360929	0.195453
ENSSSCG00000002752	0.41836	0.195453
ENSSSCG00000000299	-0.420782	0.195453
ENSSSCG00000035941	0.571447	0.195502
ENSSSCG00000035218	0.384386	0.195502
ENSSSCG00000014780	-0.418724	0.196317
ENSSSCG00000039770	-0.449562	0.196673
ENSSSCG00000044939	-0.413533	0.196673
ENSSSCG00000039500	0.57767	0.198009
ENSSSCG00000000107	-0.417765	0.198009
ENSSSCG00000014073	0.342322	0.198447
ENSSSCG00000049402	0.606124	0.198465
ENSSSCG00000034598	-0.585279	0.198653
ENSSSCG00000001679	-0.384872	0.20101
ENSSSCG00000017577	0.577741	0.201721
ENSSSCG00000005704	-0.510515	0.20313
ENSSSCG00000031789	-0.257658	0.203835
ENSSSCG00000039009	-0.554876	0.204156
ENSSSCG00000025777	0.528733	0.204681
ENSSSCG00000024242	-0.383854	0.204681
ENSSSCG00000017420	-0.4227	0.204681
ENSSSCG00000010340	0.446795	0.205932
ENSSSCG00000008016	-0.517627	0.207341
ENSSSCG00000030362	-0.497266	0.209699
ENSSSCG00000013102	0.59628	0.211795
ENSSSCG00000015784	-0.358105	0.211795
ENSSSCG00000021557	0.424768	0.211795
ENSSSCG00000024742	-0.597369	0.211936
ENSSSCG00000038364	-0.564524	0.211936
ENSSSCG00000035634	-0.391901	0.212267
ENSSSCG00000008742	-0.436775	0.212267
ENSSSCG00000000092	0.552543	0.212423
ENSSSCG00000009739	-0.454906	0.213354
ENSSSCG00000016034	0.356163	0.213354
ENSSSCG00000036705	-0.437398	0.213718
ENSSSCG00000023173	-0.57656	0.213828
ENSSSCG00000035629	-0.574673	0.213828
ENSSSCG00000010494	0.428872	0.213828
ENSSSCG00000006115	0.305602	0.213828
ENSSSCG00000033146	0.584776	0.213828
ENSSSCG00000048792	-0.447764	0.213828
ENSSSCG00000008339	0.299084	0.214013
ENSSSCG00000009403	0.41988	0.214013
ENSSSCG00000000864	0.447372	0.214603
ENSSSCG00000002844	0.274296	0.21736
ENSSSCG00000010209	0.451995	0.217729
ENSSSCG00000020749	-0.366838	0.217845
ENSSSCG00000026402	0.589171	0.21872
ENSSSCG00000010219	-0.272813	0.21872
ENSSSCG00000007061	-0.588009	0.21872
ENSSSCG00000016621	0.568192	0.21872
ENSSSCG00000033179	0.593303	0.219257
ENSSSCG00000021149	-0.313832	0.21935
ENSSSCG00000009011	0.449109	0.21935
ENSSSCG00000000734	0.480055	0.220264
ENSSSCG00000025924	0.426766	0.220452
ENSSSCG00000013397	-0.319055	0.222527
ENSSSCG00000008724	-0.447214	0.222527
ENSSSCG00000003218	-0.570224	0.222534
ENSSSCG00000013468	-0.377463	0.222534
ENSSSCG00000024973	-0.45262	0.222534
ENSSSCG00000037016	0.566987	0.222534
ENSSSCG00000027806	-0.377741	0.222534
ENSSSCG00000004139	-0.347997	0.222763
ENSSSCG00000026707	0.503964	0.222778
ENSSSCG00000014791	-0.283987	0.222778
ENSSSCG00000048981	-0.550182	0.222799
ENSSSCG00000034261	0.353004	0.222799
ENSSSCG00000007189	0.534296	0.222799
ENSSSCG00000047882	0.39247	0.223481
ENSSSCG00000008452	-0.258256	0.223481
ENSSSCG00000008143	-0.353368	0.223481
ENSSSCG00000004617	0.328563	0.223648
ENSSSCG00000004290	0.569799	0.22494
ENSSSCG00000011355	-0.587282	0.22494
ENSSSCG00000003552	-0.540851	0.22494
ENSSSCG00000010757	0.414282	0.22494
ENSSSCG00000016033	0.454931	0.22494
ENSSSCG00000029189	-0.584173	0.22494
ENSSSCG00000021359	0.496786	0.22494
ENSSSCG00000030582	-0.409166	0.22494
ENSSSCG00000039287	-0.58779	0.22494
ENSSSCG00000011107	-0.239295	0.22494
ENSSSCG00000011538	0.45436	0.227391
ENSSSCG00000039166	0.584578	0.227391
ENSSSCG00000041560	0.567157	0.227391
ENSSSCG00000015720	-0.443441	0.228477
ENSSSCG00000004938	0.426063	0.229254
ENSSSCG00000005105	-0.370977	0.229254
ENSSSCG00000007788	-0.405187	0.229305
ENSSSCG00000012920	0.549849	0.229406
ENSSSCG00000028694	-0.273789	0.229406
ENSSSCG00000036996	0.534973	0.229615
ENSSSCG00000012258	-0.405124	0.229615
ENSSSCG00000035987	0.582105	0.230393
ENSSSCG00000032686	-0.283223	0.230656
ENSSSCG00000040349	0.572621	0.23149
ENSSSCG00000006911	0.349286	0.231571
ENSSSCG00000028185	-0.368918	0.231764
ENSSSCG00000027404	-0.558375	0.232316
ENSSSCG00000050388	0.576176	0.232316
ENSSSCG00000007009	0.495688	0.232316
ENSSSCG00000004787	0.505521	0.232658
ENSSSCG00000008812	-0.323818	0.232921
ENSSSCG00000024413	-0.419216	0.233266
ENSSSCG00000020912	0.473452	0.233727
ENSSSCG00000051386	0.572882	0.233727
ENSSSCG00000031201	0.575328	0.233727
ENSSSCG00000032262	-0.489665	0.233771
ENSSSCG00000003261	-0.543811	0.234377
ENSSSCG00000027426	-0.448746	0.235064
ENSSSCG00000038320	-0.323669	0.235254
ENSSSCG00000004558	-0.294622	0.235371
ENSSSCG00000036883	-0.384981	0.235371
ENSSSCG00000003006	0.412531	0.235371
ENSSSCG00000029482	0.357489	0.235371
ENSSSCG00000028549	0.410671	0.235371
ENSSSCG00000001539	-0.34178	0.235371
ENSSSCG00000009542	-0.363158	0.235371
ENSSSCG00000029494	0.500282	0.235371
ENSSSCG00000036790	-0.318249	0.235707
ENSSSCG00000036820	0.551742	0.236237
ENSSSCG00000015963	-0.207181	0.236461
ENSSSCG00000011349	0.414727	0.237257
ENSSSCG00000009148	-0.432908	0.237257
ENSSSCG00000008035	-0.486482	0.237257
ENSSSCG00000023176	0.433539	0.239248
ENSSSCG00000016175	-0.327791	0.239662
ENSSSCG00000040457	0.533964	0.239662
ENSSSCG00000030510	-0.507652	0.240511
ENSSSCG00000023228	-0.376983	0.24179
ENSSSCG00000050854	0.494926	0.24179
ENSSSCG00000035770	-0.522141	0.242343
ENSSSCG00000051792	0.433668	0.242343
ENSSSCG00000039598	-0.38888	0.242776
ENSSSCG00000026742	0.3816	0.243659
ENSSSCG00000003564	-0.372577	0.246236
ENSSSCG00000000559	0.331066	0.246236
ENSSSCG00000008593	0.409481	0.246568
ENSSSCG00000049999	0.453914	0.246568
ENSSSCG00000016057	-0.348835	0.246924
ENSSSCG00000000874	0.522473	0.246924
ENSSSCG00000044489	0.505467	0.247573
ENSSSCG00000024613	0.447502	0.247669
ENSSSCG00000016717	-0.284968	0.247916
ENSSSCG00000025206	-0.329979	0.248729
ENSSSCG00000051601	0.353264	0.248729
ENSSSCG00000030130	0.410849	0.248729
ENSSSCG00000015945	-0.308733	0.248729
ENSSSCG00000017226	0.530099	0.250108
ENSSSCG00000039807	0.513389	0.250154
ENSSSCG00000014121	0.33426	0.250293
ENSSSCG00000004962	0.373502	0.250968
ENSSSCG00000010146	-0.477215	0.251158
ENSSSCG00000016438	-0.327726	0.253481
ENSSSCG00000039813	0.54531	0.254885
ENSSSCG00000037466	0.406874	0.254911
ENSSSCG00000037536	-0.435055	0.255508
ENSSSCG00000016784	0.336145	0.255508
ENSSSCG00000013393	0.492541	0.255584
ENSSSCG00000038904	0.568005	0.256002
ENSSSCG00000008819	-0.38766	0.256002
ENSSSCG00000035856	0.41462	0.256002
ENSSSCG00000015644	-0.387746	0.256089
ENSSSCG00000002427	0.553035	0.256316
ENSSSCG00000027197	-0.51914	0.256506
ENSSSCG00000022804	0.398149	0.257312
ENSSSCG00000010281	0.418864	0.257312
ENSSSCG00000015730	-0.375155	0.25755
ENSSSCG00000007622	0.564885	0.25755
ENSSSCG00000016226	-0.309114	0.257655
ENSSSCG00000031970	-0.27588	0.2586
ENSSSCG00000015660	-0.566084	0.2586
ENSSSCG00000034639	0.556485	0.259235
ENSSSCG00000028372	0.548484	0.259753
ENSSSCG00000037426	-0.542616	0.259753
ENSSSCG00000038080	0.410296	0.259753
ENSSSCG00000039549	0.397674	0.259753
ENSSSCG00000006286	0.541655	0.259753
ENSSSCG00000005593	0.516462	0.260101
ENSSSCG00000031541	0.305946	0.260101
ENSSSCG00000015711	0.559829	0.260101
ENSSSCG00000047947	0.492673	0.260101
ENSSSCG00000039393	0.350542	0.260937
ENSSSCG00000044524	-0.456969	0.263148
ENSSSCG00000021397	-0.541188	0.263632
ENSSSCG00000040465	0.516458	0.263738
ENSSSCG00000036572	-0.551213	0.263928
ENSSSCG00000027302	-0.56109	0.263934
ENSSSCG00000036723	0.512865	0.263934
ENSSSCG00000011609	0.561951	0.26508
ENSSSCG00000040944	-0.483876	0.265221
ENSSSCG00000013990	-0.561676	0.265312
ENSSSCG00000006197	-0.39354	0.265858
ENSSSCG00000031269	-0.348568	0.265858
ENSSSCG00000012896	-0.395667	0.266459
ENSSSCG00000049108	0.559498	0.266459
ENSSSCG00000033367	0.284856	0.266459
ENSSSCG00000031580	-0.32127	0.266459
ENSSSCG00000007019	-0.290165	0.266459
ENSSSCG00000017277	0.275968	0.266459
ENSSSCG00000034572	-0.3144	0.268122
ENSSSCG00000036008	0.554732	0.268122
ENSSSCG00000006543	-0.315054	0.268122
ENSSSCG00000043413	-0.549538	0.268413
ENSSSCG00000004630	0.546349	0.268547
ENSSSCG00000047818	-0.559012	0.268547
ENSSSCG00000001910	-0.478521	0.268547
ENSSSCG00000043656	0.510916	0.268881
ENSSSCG00000023924	0.441527	0.268881
ENSSSCG00000007092	-0.311933	0.268881
ENSSSCG00000014338	-0.409935	0.268958
ENSSSCG00000008624	-0.335221	0.268958
ENSSSCG00000024043	0.384487	0.269024
ENSSSCG00000011825	-0.315336	0.26967
ENSSSCG00000037263	0.495943	0.26967
ENSSSCG00000028444	0.334377	0.26967
ENSSSCG00000036139	0.557526	0.26967
ENSSSCG00000035318	-0.273027	0.26967
ENSSSCG00000008854	0.475932	0.269793
ENSSSCG00000033251	-0.516533	0.269793
ENSSSCG00000031433	0.512254	0.269793
ENSSSCG00000017137	0.536718	0.269793
ENSSSCG00000011511	0.416899	0.270339
ENSSSCG00000009610	0.54817	0.270339
ENSSSCG00000022312	-0.44933	0.272612
ENSSSCG00000035532	-0.483399	0.272785
ENSSSCG00000022383	0.545835	0.272785
ENSSSCG00000001838	0.434053	0.272785
ENSSSCG00000010957	0.40087	0.273337
ENSSSCG00000036039	0.325809	0.274018
ENSSSCG00000039268	0.538161	0.274018
ENSSSCG00000009045	0.516905	0.274018
ENSSSCG00000001683	0.453137	0.274553
ENSSSCG00000015794	0.508443	0.275431
ENSSSCG00000025085	0.494248	0.275435
ENSSSCG00000027669	0.474641	0.276366
ENSSSCG00000038469	0.411517	0.276366
ENSSSCG00000040586	-0.42659	0.276864
ENSSSCG00000044127	0.401065	0.279004
ENSSSCG00000011872	0.498745	0.279004
ENSSSCG00000030369	-0.318667	0.279004
ENSSSCG00000037494	0.501301	0.279004
ENSSSCG00000036050	0.379097	0.279004
ENSSSCG00000033272	-0.277604	0.279004
ENSSSCG00000004167	-0.368281	0.279096
ENSSSCG00000005975	0.437202	0.279163
ENSSSCG00000011082	0.51821	0.280006
ENSSSCG00000032986	0.399877	0.280007
ENSSSCG00000013048	-0.432688	0.280349
ENSSSCG00000013888	-0.375822	0.280349
ENSSSCG00000017617	0.308576	0.280349
ENSSSCG00000032652	-0.433948	0.280349
ENSSSCG00000005941	0.439188	0.280757
ENSSSCG00000006179	0.412049	0.280757
ENSSSCG00000023243	0.216608	0.281118
ENSSSCG00000045050	0.549362	0.281556
ENSSSCG00000021138	-0.259683	0.281556
ENSSSCG00000011670	0.415458	0.281976
ENSSSCG00000003923	-0.50339	0.281976
ENSSSCG00000049076	-0.545934	0.281976
ENSSSCG00000006196	-0.365081	0.281976
ENSSSCG00000042146	0.549256	0.281981
ENSSSCG00000016122	-0.526769	0.281981
ENSSSCG00000021812	0.521957	0.282106
ENSSSCG00000021511	0.547543	0.282485
ENSSSCG00000034284	0.473487	0.285395
ENSSSCG00000030095	0.481389	0.285395
ENSSSCG00000027119	-0.479889	0.285519
ENSSSCG00000002464	0.533037	0.285519
ENSSSCG00000006788	0.413708	0.285834
ENSSSCG00000022661	0.371576	0.286251
ENSSSCG00000001436	0.47316	0.286251
ENSSSCG00000041723	0.541658	0.286251
ENSSSCG00000024754	0.290116	0.286251
ENSSSCG00000011876	-0.331681	0.286509
ENSSSCG00000006720	0.413888	0.286509
ENSSSCG00000012581	0.459223	0.286509
ENSSSCG00000035825	0.523364	0.286509
ENSSSCG00000000061	-0.424783	0.286829
ENSSSCG00000026753	0.316889	0.287202
ENSSSCG00000037061	-0.518825	0.287202
ENSSSCG00000002865	-0.274208	0.287202
ENSSSCG00000029388	0.498354	0.287202
ENSSSCG00000012102	-0.33913	0.287202
ENSSSCG00000019768	-0.545321	0.287202
ENSSSCG00000017466	-0.539592	0.287202
ENSSSCG00000004291	-0.544069	0.287319
ENSSSCG00000037245	-0.234847	0.287565
ENSSSCG00000036612	-0.545214	0.287679
ENSSSCG00000013086	-0.273464	0.287748
ENSSSCG00000017682	-0.401916	0.287748
ENSSSCG00000039745	0.539172	0.288684
ENSSSCG00000004453	0.501094	0.288699
ENSSSCG00000024145	-0.340769	0.290833
ENSSSCG00000034516	0.529971	0.291043
ENSSSCG00000037559	0.502651	0.291043
ENSSSCG00000022236	0.398239	0.291043
ENSSSCG00000017983	0.512624	0.291043
ENSSSCG00000011925	0.383612	0.291108
ENSSSCG00000015862	0.3902	0.291108
ENSSSCG00000007530	0.466502	0.291195
ENSSSCG00000031144	-0.416962	0.291195
ENSSSCG00000051505	-0.51211	0.292396
ENSSSCG00000006375	0.324634	0.293086
ENSSSCG00000029097	-0.4441	0.293248
ENSSSCG00000026180	-0.438932	0.293586
ENSSSCG00000005951	-0.335786	0.29503
ENSSSCG00000037200	-0.443947	0.296594
ENSSSCG00000011245	0.413409	0.297352
ENSSSCG00000013726	-0.272814	0.297352
ENSSSCG00000023118	-0.323327	0.297352
ENSSSCG00000026110	-0.228881	0.297352
ENSSSCG00000048017	-0.4774	0.297352
ENSSSCG00000020853	0.516593	0.297352
ENSSSCG00000024071	0.465083	0.297352
ENSSSCG00000023852	-0.533905	0.297686
ENSSSCG00000001810	-0.343627	0.297686
ENSSSCG00000015669	0.343859	0.297779
ENSSSCG00000020717	0.441567	0.297779
ENSSSCG00000016773	-0.397593	0.298706
ENSSSCG00000032715	-0.378341	0.301018
ENSSSCG00000045297	0.453158	0.301096
ENSSSCG00000004145	0.417106	0.301325
ENSSSCG00000015090	-0.404097	0.301538
ENSSSCG00000037600	0.536383	0.302165
ENSSSCG00000003981	-0.396162	0.302165
ENSSSCG00000003189	-0.313719	0.302165
ENSSSCG00000003708	0.341076	0.302165
ENSSSCG00000003551	-0.526417	0.302165
ENSSSCG00000012934	-0.33632	0.302165
ENSSSCG00000031173	0.480568	0.302165
ENSSSCG00000027378	0.364484	0.302165
ENSSSCG00000016650	-0.412025	0.302165
ENSSSCG00000007733	-0.302519	0.302783
ENSSSCG00000002723	-0.435713	0.303256
ENSSSCG00000014303	-0.331442	0.303424
ENSSSCG00000011729	0.439258	0.303695
ENSSSCG00000008340	0.321192	0.303695
ENSSSCG00000006391	0.507434	0.303695
ENSSSCG00000034964	-0.23372	0.303695
ENSSSCG00000005627	-0.522365	0.303888
ENSSSCG00000001041	-0.362392	0.303888
ENSSSCG00000032171	-0.29103	0.303888
ENSSSCG00000023255	-0.531772	0.305441
ENSSSCG00000006732	-0.473867	0.305441
ENSSSCG00000000656	-0.463268	0.305441
ENSSSCG00000039841	0.462401	0.306525
ENSSSCG00000035102	0.464607	0.306525
ENSSSCG00000007675	0.534025	0.306525
ENSSSCG00000023140	-0.314186	0.306525
ENSSSCG00000001499	0.441791	0.306525
ENSSSCG00000000456	0.437118	0.306525
ENSSSCG00000041731	-0.387056	0.306525
ENSSSCG00000038327	-0.522364	0.307364
ENSSSCG00000024983	-0.312267	0.307678
ENSSSCG00000024206	-0.349094	0.308638
ENSSSCG00000010533	0.505149	0.308757
ENSSSCG00000016275	-0.402309	0.308757
ENSSSCG00000042940	-0.526351	0.308893
ENSSSCG00000048207	0.505569	0.308893
ENSSSCG00000038162	-0.531049	0.308893
ENSSSCG00000008459	-0.342137	0.309931
ENSSSCG00000000642	0.492957	0.311276
ENSSSCG00000031536	0.451477	0.312708
ENSSSCG00000033912	0.314797	0.312708
ENSSSCG00000010240	-0.438745	0.312708
ENSSSCG00000006481	-0.354103	0.312708
ENSSSCG00000032438	0.520619	0.313657
ENSSSCG00000022230	0.392892	0.313657
ENSSSCG00000004394	-0.260612	0.315292
ENSSSCG00000027659	0.335083	0.315292
ENSSSCG00000023936	0.527789	0.315292
ENSSSCG00000011020	0.419999	0.315292
ENSSSCG00000013599	0.482909	0.315501
ENSSSCG00000042951	-0.472357	0.315501
ENSSSCG00000004127	-0.359458	0.316944
ENSSSCG00000005661	-0.506304	0.316944
ENSSSCG00000005257	0.459231	0.316944
ENSSSCG00000047981	0.527248	0.316944
ENSSSCG00000033874	0.526617	0.316944
ENSSSCG00000028288	-0.331986	0.316944
ENSSSCG00000003017	-0.319905	0.316944
ENSSSCG00000030177	-0.386681	0.316944
ENSSSCG00000049102	0.518311	0.316944
ENSSSCG00000027847	-0.506152	0.316944
ENSSSCG00000035649	0.490392	0.316944
ENSSSCG00000025492	0.281433	0.316944
ENSSSCG00000015766	0.526482	0.316944
ENSSSCG00000008675	-0.436388	0.316944
ENSSSCG00000000146	0.394668	0.316944
ENSSSCG00000024914	-0.495498	0.316944
ENSSSCG00000023788	0.520635	0.316944
ENSSSCG00000000916	0.505828	0.316944
ENSSSCG00000029602	-0.296293	0.316944
ENSSSCG00000048028	0.48133	0.316944
ENSSSCG00000017251	0.524561	0.316944
ENSSSCG00000040594	0.5258	0.317221
ENSSSCG00000003506	0.391212	0.317221
ENSSSCG00000000663	0.488991	0.317221
ENSSSCG00000012974	-0.334992	0.31823
ENSSSCG00000005308	0.361696	0.318514
ENSSSCG00000012487	0.491928	0.318514
ENSSSCG00000002290	-0.520493	0.318514
ENSSSCG00000014157	0.376548	0.319235
ENSSSCG00000045095	0.433834	0.319442
ENSSSCG00000049143	-0.491032	0.31975
ENSSSCG00000002681	0.440023	0.31975
ENSSSCG00000012915	0.483675	0.31975
ENSSSCG00000045856	-0.525011	0.31975
ENSSSCG00000043551	0.524955	0.31975
ENSSSCG00000000519	0.260715	0.320265
ENSSSCG00000016915	0.519766	0.321666
ENSSSCG00000014259	-0.499784	0.322786
ENSSSCG00000016956	0.510754	0.322786
ENSSSCG00000036480	0.465405	0.323155
ENSSSCG00000010315	-0.266424	0.323956
ENSSSCG00000045751	0.392253	0.325089
ENSSSCG00000029419	-0.510654	0.32607
ENSSSCG00000006455	0.521706	0.32607
ENSSSCG00000017544	-0.414406	0.32607
ENSSSCG00000051289	-0.509832	0.326487
ENSSSCG00000015567	0.287587	0.326487
ENSSSCG00000014994	0.402502	0.326487
ENSSSCG00000028019	-0.444699	0.326487
ENSSSCG00000007027	-0.32402	0.327022
ENSSSCG00000002368	0.390429	0.327561
ENSSSCG00000030428	-0.373115	0.327653
ENSSSCG00000001701	-0.301687	0.327653
ENSSSCG00000004996	0.264929	0.327814
ENSSSCG00000017364	-0.515209	0.327814
ENSSSCG00000017738	0.398627	0.329025
ENSSSCG00000014072	-0.374908	0.329545
ENSSSCG00000042577	0.502397	0.329565
ENSSSCG00000004421	-0.294505	0.329691
ENSSSCG00000024015	-0.487613	0.329691
ENSSSCG00000040448	0.508424	0.329691
ENSSSCG00000033451	-0.506262	0.329691
ENSSSCG00000002386	0.352163	0.330392
ENSSSCG00000007072	-0.489887	0.330967
ENSSSCG00000003062	-0.488543	0.331478
ENSSSCG00000010342	-0.475904	0.331478
ENSSSCG00000007691	0.376544	0.331478
ENSSSCG00000031509	0.442157	0.331478
ENSSSCG00000001950	-0.21173	0.331894
ENSSSCG00000025425	-0.387214	0.331949
ENSSSCG00000048343	-0.505011	0.33261
ENSSSCG00000045657	0.501165	0.33261
ENSSSCG00000007514	-0.217475	0.33261
ENSSSCG00000000293	-0.376016	0.332638
ENSSSCG00000035581	0.242118	0.332638
ENSSSCG00000027857	0.201171	0.332903
ENSSSCG00000049534	0.437298	0.333583
ENSSSCG00000030289	-0.221522	0.333602
ENSSSCG00000003702	0.387661	0.334048
ENSSSCG00000015111	0.446146	0.334048
ENSSSCG00000008986	-0.252723	0.334048
ENSSSCG00000001197	-0.51381	0.334048
ENSSSCG00000023972	-0.344566	0.334048
ENSSSCG00000048005	-0.515253	0.334676
ENSSSCG00000003068	-0.37393	0.334676
ENSSSCG00000003105	-0.44119	0.334676
ENSSSCG00000040037	0.459745	0.334676
ENSSSCG00000009186	-0.257004	0.334676
ENSSSCG00000006718	-0.509569	0.334676
ENSSSCG00000006280	0.297439	0.334676
ENSSSCG00000028304	0.323636	0.334676
ENSSSCG00000029945	-0.503556	0.334676
ENSSSCG00000034632	-0.49502	0.334676
ENSSSCG00000040013	0.475843	0.334676
ENSSSCG00000016541	-0.333148	0.334676
ENSSSCG00000049915	-0.478247	0.334909
ENSSSCG00000000657	0.301649	0.334909
ENSSSCG00000039703	0.292761	0.335454
ENSSSCG00000010416	0.497553	0.335765
ENSSSCG00000032423	0.514116	0.335987
ENSSSCG00000005222	0.505733	0.336817
ENSSSCG00000038927	0.513636	0.337586
ENSSSCG00000002846	-0.283105	0.337586
ENSSSCG00000004486	0.293977	0.337828
ENSSSCG00000035284	0.446303	0.33999
ENSSSCG00000030477	-0.504339	0.33999
ENSSSCG00000011514	0.309573	0.341013
ENSSSCG00000035416	0.470345	0.341013
ENSSSCG00000010825	0.480919	0.342968
ENSSSCG00000009151	0.476412	0.343165
ENSSSCG00000017165	-0.266839	0.343165
ENSSSCG00000006418	-0.345421	0.343331
ENSSSCG00000017397	0.463052	0.345173
ENSSSCG00000009865	0.490904	0.345267
ENSSSCG00000028674	0.493453	0.345267
ENSSSCG00000038990	0.509234	0.345267
ENSSSCG00000035791	0.510951	0.345573
ENSSSCG00000025784	0.50729	0.346211
ENSSSCG00000043906	-0.46895	0.346933
ENSSSCG00000004598	0.422059	0.347035
ENSSSCG00000037565	-0.501911	0.347035
ENSSSCG00000038493	-0.200841	0.348672
ENSSSCG00000034815	0.398265	0.348696
ENSSSCG00000022044	0.483952	0.349288
ENSSSCG00000004502	0.494588	0.349288
ENSSSCG00000022039	0.494504	0.349288
ENSSSCG00000033303	0.422343	0.349288
ENSSSCG00000011663	0.481098	0.349288
ENSSSCG00000030255	-0.307838	0.349288
ENSSSCG00000003089	-0.400306	0.349288
ENSSSCG00000028327	0.351202	0.349288
ENSSSCG00000022225	-0.252741	0.349288
ENSSSCG00000019375	-0.396898	0.349288
ENSSSCG00000015512	0.506508	0.349288
ENSSSCG00000026084	0.465831	0.349288
ENSSSCG00000001410	-0.279029	0.349288
ENSSSCG00000038950	-0.409271	0.349288
ENSSSCG00000001459	0.474056	0.349288
ENSSSCG00000022083	0.506124	0.349288
ENSSSCG00000021158	0.501222	0.349288
ENSSSCG00000028602	-0.345465	0.349288
ENSSSCG00000028529	0.497554	0.349288
ENSSSCG00000017139	-0.331915	0.349288
ENSSSCG00000004542	-0.388025	0.3495
ENSSSCG00000004909	0.506568	0.35027
ENSSSCG00000032053	0.50701	0.35027
ENSSSCG00000028010	-0.271928	0.35027
ENSSSCG00000003749	0.237655	0.35027
ENSSSCG00000014255	-0.307449	0.35027
ENSSSCG00000024569	-0.49261	0.35027
ENSSSCG00000010565	-0.399564	0.35027
ENSSSCG00000038867	-0.244142	0.35027
ENSSSCG00000009115	-0.405162	0.35027
ENSSSCG00000031262	0.408548	0.35027
ENSSSCG00000006230	0.339026	0.35027
ENSSSCG00000025303	-0.322639	0.35027
ENSSSCG00000022837	-0.472897	0.35027
ENSSSCG00000021562	0.310471	0.35027
ENSSSCG00000050264	0.505764	0.350326
ENSSSCG00000047338	-0.505799	0.350326
ENSSSCG00000007240	0.358862	0.350326
ENSSSCG00000046723	-0.482973	0.35183
ENSSSCG00000006735	0.454217	0.351868
ENSSSCG00000006737	0.454316	0.352017
ENSSSCG00000000504	0.345636	0.352017
ENSSSCG00000038441	0.499701	0.352113
ENSSSCG00000012018	-0.381819	0.353179
ENSSSCG00000018715	-0.481965	0.353303
ENSSSCG00000036702	-0.329906	0.353303
ENSSSCG00000030222	-0.272457	0.353461
ENSSSCG00000028282	-0.418282	0.353461
ENSSSCG00000006083	0.302409	0.353461
ENSSSCG00000000020	-0.43038	0.353461
ENSSSCG00000006781	0.309459	0.354204
ENSSSCG00000012823	-0.322934	0.354204
ENSSSCG00000001989	0.49571	0.354204
ENSSSCG00000011070	-0.305941	0.354204
ENSSSCG00000007526	-0.301694	0.354204
ENSSSCG00000047240	0.48941	0.354749
ENSSSCG00000040556	-0.464574	0.355002
ENSSSCG00000011081	0.425577	0.355002
ENSSSCG00000045408	0.498356	0.355017
ENSSSCG00000022895	0.40541	0.355493
ENSSSCG00000004612	-0.293463	0.355566
ENSSSCG00000051346	0.446622	0.356089
ENSSSCG00000013300	-0.420889	0.356089
ENSSSCG00000046677	0.455735	0.356089
ENSSSCG00000008873	0.39153	0.356089
ENSSSCG00000008898	0.466494	0.356089
ENSSSCG00000008228	-0.468596	0.356452
ENSSSCG00000004948	0.416066	0.356626
ENSSSCG00000011387	0.463736	0.35699
ENSSSCG00000030042	-0.351046	0.35699
ENSSSCG00000034418	0.355189	0.357347
ENSSSCG00000010605	-0.268635	0.358063
ENSSSCG00000015584	0.42468	0.358063
ENSSSCG00000032474	-0.490886	0.358063
ENSSSCG00000037561	-0.302308	0.358063
ENSSSCG00000032552	-0.326793	0.358063
ENSSSCG00000030388	-0.49526	0.358063
ENSSSCG00000003586	-0.242646	0.358624
ENSSSCG00000040397	0.32474	0.358624
ENSSSCG00000031781	-0.37745	0.358624
ENSSSCG00000022741	0.312451	0.358624
ENSSSCG00000008509	0.327431	0.358624
ENSSSCG00000006743	-0.327619	0.358624
ENSSSCG00000032242	-0.423079	0.358624
ENSSSCG00000007288	-0.488159	0.358624
ENSSSCG00000049223	0.312024	0.358847
ENSSSCG00000000745	-0.396312	0.359199
ENSSSCG00000014007	0.492886	0.359258
ENSSSCG00000050834	0.499921	0.359565
ENSSSCG00000007669	0.49826	0.359565
ENSSSCG00000001750	-0.257307	0.359565
ENSSSCG00000016898	-0.330068	0.359565
ENSSSCG00000051428	0.495537	0.359565
ENSSSCG00000005096	-0.21006	0.359768
ENSSSCG00000003468	-0.290359	0.362178
ENSSSCG00000035400	0.327506	0.36259
ENSSSCG00000004875	0.400728	0.364782
ENSSSCG00000038786	0.441124	0.364782
ENSSSCG00000011946	0.230334	0.364782
ENSSSCG00000003806	0.321871	0.364782
ENSSSCG00000015411	-0.241234	0.364782
ENSSSCG00000043219	-0.490589	0.364782
ENSSSCG00000008312	0.404381	0.364782
ENSSSCG00000027855	-0.44001	0.364782
ENSSSCG00000005949	-0.313457	0.364782
ENSSSCG00000031053	0.496916	0.364782
ENSSSCG00000035887	0.493587	0.364782
ENSSSCG00000032846	0.288284	0.364782
ENSSSCG00000012619	-0.251037	0.364782
ENSSSCG00000001620	0.462283	0.364782
ENSSSCG00000050343	0.489887	0.364782
ENSSSCG00000000974	-0.404475	0.364782
ENSSSCG00000000605	0.398907	0.364782
ENSSSCG00000000853	-0.336691	0.364782
ENSSSCG00000031800	-0.372387	0.364782
ENSSSCG00000024635	0.36687	0.364782
ENSSSCG00000017712	-0.175696	0.364782
ENSSSCG00000040205	0.420852	0.364782
ENSSSCG00000037832	0.426106	0.364782
ENSSSCG00000030309	0.359559	0.36612
ENSSSCG00000021173	-0.494402	0.366235
ENSSSCG00000035525	0.484117	0.366235
ENSSSCG00000003384	-0.278903	0.366235
ENSSSCG00000015850	-0.380141	0.366235
ENSSSCG00000000602	0.3964	0.366235
ENSSSCG00000009535	0.320477	0.366235
ENSSSCG00000006337	-0.305722	0.367455
ENSSSCG00000012790	-0.375595	0.36874
ENSSSCG00000007465	-0.261684	0.36874
ENSSSCG00000038735	0.226547	0.369043
ENSSSCG00000048111	0.393357	0.369418
ENSSSCG00000004280	-0.428969	0.369535
ENSSSCG00000021991	-0.348495	0.369535
ENSSSCG00000013717	0.493716	0.369535
ENSSSCG00000004202	0.377611	0.369639
ENSSSCG00000023279	0.481369	0.370568
ENSSSCG00000005041	0.307828	0.370695
ENSSSCG00000011548	0.347747	0.370695
ENSSSCG00000025810	0.457675	0.370695
ENSSSCG00000036152	0.399932	0.370695
ENSSSCG00000006848	0.290464	0.370695
ENSSSCG00000000723	-0.297498	0.370695
ENSSSCG00000011568	-0.481444	0.370699
ENSSSCG00000010380	-0.296357	0.370699
ENSSSCG00000030113	0.485474	0.370699
ENSSSCG00000013893	0.42658	0.37092
ENSSSCG00000010148	0.318742	0.371251
ENSSSCG00000000684	-0.385037	0.371251
ENSSSCG00000001907	-0.352108	0.372506
ENSSSCG00000000737	0.453473	0.372506
ENSSSCG00000021060	-0.332287	0.372506
ENSSSCG00000009420	-0.307868	0.372506
ENSSSCG00000015808	0.222657	0.373101
ENSSSCG00000050944	-0.384469	0.373456
ENSSSCG00000040267	-0.484661	0.373456
ENSSSCG00000012685	-0.263262	0.374378
ENSSSCG00000013591	-0.361526	0.374813
ENSSSCG00000013094	-0.286956	0.376251
ENSSSCG00000008437	0.182546	0.376398
ENSSSCG00000051754	-0.465159	0.376522
ENSSSCG00000007435	0.411491	0.376553
ENSSSCG00000032408	0.263015	0.377498
ENSSSCG00000000500	0.413861	0.377941
ENSSSCG00000009808	0.292432	0.378196
ENSSSCG00000021289	-0.28152	0.378196
ENSSSCG00000007642	0.479984	0.378196
ENSSSCG00000024770	-0.372239	0.378196
ENSSSCG00000009072	0.278317	0.380241
ENSSSCG00000031579	-0.414343	0.380241
ENSSSCG00000011234	0.35731	0.3804
ENSSSCG00000002962	-0.272919	0.380454
ENSSSCG00000025434	0.380339	0.383411
ENSSSCG00000005186	-0.358832	0.383411
ENSSSCG00000002866	0.45843	0.383411
ENSSSCG00000008359	0.212506	0.383411
ENSSSCG00000049405	-0.471919	0.3847
ENSSSCG00000041287	0.48003	0.3847
ENSSSCG00000011120	0.400422	0.3847
ENSSSCG00000007700	0.45464	0.385023
ENSSSCG00000005959	-0.191885	0.385882
ENSSSCG00000012875	0.476605	0.38593
ENSSSCG00000015892	-0.210598	0.38593
ENSSSCG00000011699	0.354909	0.386909
ENSSSCG00000044952	-0.352957	0.387097
ENSSSCG00000002009	-0.480629	0.387097
ENSSSCG00000012397	-0.338796	0.387971
ENSSSCG00000010253	-0.266946	0.388211
ENSSSCG00000008529	0.333303	0.388211
ENSSSCG00000010966	-0.373359	0.388211
ENSSSCG00000037508	0.287267	0.388676
ENSSSCG00000014213	0.484666	0.388676
ENSSSCG00000004205	0.328696	0.38869
ENSSSCG00000021482	-0.427835	0.38869
ENSSSCG00000021846	0.484578	0.38869
ENSSSCG00000014035	0.48208	0.389222
ENSSSCG00000004142	0.475483	0.38932
ENSSSCG00000051406	-0.430162	0.389373
ENSSSCG00000037775	0.483709	0.389373
ENSSSCG00000036984	0.46787	0.389388
ENSSSCG00000004610	0.304484	0.389388
ENSSSCG00000043723	-0.478738	0.389415
ENSSSCG00000010580	-0.466257	0.390685
ENSSSCG00000039607	-0.291406	0.3915
ENSSSCG00000012065	0.452482	0.391573
ENSSSCG00000001702	0.477742	0.391573
ENSSSCG00000035849	0.383207	0.39324
ENSSSCG00000024777	-0.313112	0.393501
ENSSSCG00000006923	-0.270175	0.393885
ENSSSCG00000017507	-0.452924	0.393885
ENSSSCG00000023498	0.481344	0.394179
ENSSSCG00000011264	0.401003	0.394316
ENSSSCG00000049610	0.25491	0.394316
ENSSSCG00000017418	-0.426064	0.394316
ENSSSCG00000013437	0.311391	0.394745
ENSSSCG00000038617	0.337432	0.394745
ENSSSCG00000001909	-0.389883	0.395265
ENSSSCG00000031723	0.273092	0.395509
ENSSSCG00000005371	0.299957	0.396435
ENSSSCG00000008179	-0.301936	0.396435
ENSSSCG00000043867	-0.414575	0.396435
ENSSSCG00000002646	-0.336085	0.396444
ENSSSCG00000036466	0.330757	0.39768
ENSSSCG00000022029	-0.456937	0.398248
ENSSSCG00000014876	0.432647	0.398997
ENSSSCG00000045485	-0.435833	0.399303
ENSSSCG00000011449	-0.283947	0.399963
ENSSSCG00000009764	0.477418	0.399963
ENSSSCG00000029783	-0.367901	0.399963
ENSSSCG00000013891	-0.377053	0.400699
ENSSSCG00000005180	-0.267658	0.401155
ENSSSCG00000031954	0.238995	0.40186
ENSSSCG00000005724	-0.253867	0.402083
ENSSSCG00000003667	-0.255293	0.402083
ENSSSCG00000003721	0.478353	0.402083
ENSSSCG00000010437	0.340525	0.402083
ENSSSCG00000038851	-0.456074	0.402083
ENSSSCG00000009673	0.440638	0.403044
ENSSSCG00000035402	0.374874	0.403044
ENSSSCG00000017812	-0.26881	0.403135
ENSSSCG00000037762	0.46302	0.404091
ENSSSCG00000010797	-0.315838	0.404305
ENSSSCG00000014215	0.25157	0.404954
ENSSSCG00000006340	0.446902	0.404954
ENSSSCG00000007460	-0.221659	0.404954
ENSSSCG00000028124	-0.199068	0.404954
ENSSSCG00000022655	-0.436121	0.405099
ENSSSCG00000005078	-0.233922	0.405099
ENSSSCG00000039990	-0.46408	0.405099
ENSSSCG00000037318	0.464827	0.405099
ENSSSCG00000034814	-0.406141	0.405099
ENSSSCG00000035757	0.361512	0.405099
ENSSSCG00000013292	0.391451	0.405099
ENSSSCG00000042894	0.447569	0.405099
ENSSSCG00000026269	-0.335336	0.405099
ENSSSCG00000030821	0.458116	0.405099
ENSSSCG00000015410	0.191507	0.405099
ENSSSCG00000008966	0.220194	0.405099
ENSSSCG00000005901	-0.476104	0.405099
ENSSSCG00000006831	-0.453949	0.405099
ENSSSCG00000012657	-0.29498	0.405099
ENSSSCG00000001807	0.472962	0.405099
ENSSSCG00000042425	-0.476234	0.405099
ENSSSCG00000030585	0.464273	0.405099
ENSSSCG00000016916	-0.258756	0.405099
ENSSSCG00000017328	-0.282266	0.405099
ENSSSCG00000037487	0.4506	0.405099
ENSSSCG00000017584	0.332088	0.406743
ENSSSCG00000042386	0.250497	0.406966
ENSSSCG00000045831	0.454753	0.406966
ENSSSCG00000017943	-0.290171	0.406966
ENSSSCG00000009886	-0.345683	0.407673
ENSSSCG00000031912	-0.305931	0.407832
ENSSSCG00000032861	0.393229	0.407832
ENSSSCG00000005671	-0.38882	0.409312
ENSSSCG00000036505	0.209147	0.40969
ENSSSCG00000029256	0.273817	0.40969
ENSSSCG00000020754	-0.341562	0.40969
ENSSSCG00000029030	-0.248353	0.40969
ENSSSCG00000025218	-0.295871	0.40969
ENSSSCG00000014267	-0.220629	0.40969
ENSSSCG00000013556	-0.442826	0.40969
ENSSSCG00000009657	-0.18475	0.40969
ENSSSCG00000024636	-0.29607	0.40969
ENSSSCG00000006376	0.377092	0.40969
ENSSSCG00000006542	-0.437288	0.40969
ENSSSCG00000006703	0.35884	0.40969
ENSSSCG00000030165	-0.459573	0.40969
ENSSSCG00000009349	0.354811	0.40969
ENSSSCG00000016502	-0.321899	0.40969
ENSSSCG00000022318	0.31453	0.41076
ENSSSCG00000029715	0.455695	0.410841
ENSSSCG00000040095	-0.332066	0.410979
ENSSSCG00000028109	0.224323	0.411067
ENSSSCG00000036270	-0.471374	0.411067
ENSSSCG00000040286	-0.214432	0.412015
ENSSSCG00000006808	0.471319	0.412015
ENSSSCG00000021176	0.214872	0.41203
ENSSSCG00000047910	-0.340204	0.41203
ENSSSCG00000015563	0.28472	0.413326
ENSSSCG00000044546	0.468766	0.413326
ENSSSCG00000034916	-0.421003	0.414285
ENSSSCG00000022105	0.460067	0.414285
ENSSSCG00000014375	-0.401898	0.414285
ENSSSCG00000010067	-0.342724	0.414285
ENSSSCG00000037032	-0.380181	0.414285
ENSSSCG00000029539	0.390741	0.414285
ENSSSCG00000032465	-0.470568	0.414285
ENSSSCG00000026004	0.355803	0.414285
ENSSSCG00000016976	0.32025	0.414285
ENSSSCG00000050979	0.46904	0.414794
ENSSSCG00000004907	0.456818	0.414848
ENSSSCG00000011847	-0.46517	0.415342
ENSSSCG00000029803	-0.257004	0.415769
ENSSSCG00000016059	-0.329664	0.415894
ENSSSCG00000007578	-0.455353	0.415894
ENSSSCG00000013145	0.308893	0.416221
ENSSSCG00000012566	0.352819	0.416221
ENSSSCG00000000268	-0.421706	0.416221
ENSSSCG00000012654	-0.333204	0.416438
ENSSSCG00000010185	-0.273691	0.416599
ENSSSCG00000015196	0.421137	0.416599
ENSSSCG00000010151	0.266953	0.417108
ENSSSCG00000041094	0.46749	0.417292
ENSSSCG00000011356	-0.338726	0.417449
ENSSSCG00000027266	-0.411737	0.417449
ENSSSCG00000032828	-0.458269	0.417449
ENSSSCG00000002450	0.44576	0.419207
ENSSSCG00000045044	0.382517	0.419307
ENSSSCG00000035355	-0.397185	0.419307
ENSSSCG00000006031	0.464648	0.419307
ENSSSCG00000001346	-0.318247	0.419307
ENSSSCG00000017215	0.46751	0.419307
ENSSSCG00000032176	-0.273694	0.419307
ENSSSCG00000028195	0.297736	0.419357
ENSSSCG00000008197	0.435159	0.419626
ENSSSCG00000001835	-0.233291	0.419626
ENSSSCG00000000869	-0.206722	0.419795
ENSSSCG00000044928	0.461379	0.42067
ENSSSCG00000003888	-0.343048	0.421841
ENSSSCG00000004328	-0.216296	0.422223
ENSSSCG00000011326	0.438365	0.422603
ENSSSCG00000043666	-0.398875	0.422603
ENSSSCG00000008965	0.411082	0.423097
ENSSSCG00000035012	0.28211	0.423097
ENSSSCG00000004917	-0.228777	0.424513
ENSSSCG00000022839	-0.331836	0.424513
ENSSSCG00000003811	0.386148	0.424513
ENSSSCG00000015842	0.253946	0.424513
ENSSSCG00000047811	0.465117	0.424513
ENSSSCG00000006463	0.333357	0.424513
ENSSSCG00000012528	0.460373	0.424513
ENSSSCG00000001527	-0.208045	0.424513
ENSSSCG00000000749	-0.459829	0.424513
ENSSSCG00000000843	-0.222634	0.424513
ENSSSCG00000011157	0.418358	0.424513
ENSSSCG00000034732	-0.457941	0.424513
ENSSSCG00000032594	-0.286966	0.425102
ENSSSCG00000024385	-0.254816	0.425185
ENSSSCG00000038237	-0.217251	0.425185
ENSSSCG00000014539	0.268852	0.425512
ENSSSCG00000012904	-0.433656	0.426869
ENSSSCG00000013670	0.386533	0.426869
ENSSSCG00000004561	0.23796	0.426917
ENSSSCG00000032067	-0.342567	0.426917
ENSSSCG00000003738	0.28949	0.426917
ENSSSCG00000003524	0.460415	0.426917
ENSSSCG00000002867	-0.246101	0.426917
ENSSSCG00000036342	-0.44026	0.426917
ENSSSCG00000009758	-0.403069	0.426917
ENSSSCG00000009769	-0.253718	0.426917
ENSSSCG00000010450	0.298348	0.426917
ENSSSCG00000015434	0.344934	0.426917
ENSSSCG00000008686	0.463065	0.426917
ENSSSCG00000031904	0.445234	0.426917
ENSSSCG00000025486	-0.327266	0.426917
ENSSSCG00000048838	0.460045	0.426917
ENSSSCG00000026161	0.33038	0.426917
ENSSSCG00000016850	0.308616	0.426917
ENSSSCG00000028239	0.297477	0.426917
ENSSSCG00000010925	0.306414	0.426917
ENSSSCG00000033190	0.449524	0.426917
ENSSSCG00000009748	-0.428486	0.427718
ENSSSCG00000009231	0.417178	0.427718
ENSSSCG00000023611	0.461139	0.427718
ENSSSCG00000042471	-0.462492	0.427718
ENSSSCG00000031220	0.394742	0.427811
ENSSSCG00000027882	0.429143	0.42874
ENSSSCG00000001074	0.347122	0.429162
ENSSSCG00000043953	-0.443476	0.429251
ENSSSCG00000004626	-0.197801	0.429303
ENSSSCG00000002933	0.304798	0.429303
ENSSSCG00000010198	-0.295931	0.429303
ENSSSCG00000032831	-0.333821	0.429303
ENSSSCG00000016036	-0.339892	0.429303
ENSSSCG00000003236	-0.314125	0.429341
ENSSSCG00000010654	0.367428	0.429341
ENSSSCG00000006079	0.429441	0.429341
ENSSSCG00000010504	0.353723	0.430239
ENSSSCG00000004018	0.304131	0.430588
ENSSSCG00000016590	-0.266562	0.430787
ENSSSCG00000004625	-0.274302	0.431352
ENSSSCG00000013638	-0.215828	0.432396
ENSSSCG00000037701	0.455295	0.432618
ENSSSCG00000011102	0.256285	0.432618
ENSSSCG00000030227	0.459201	0.432852
ENSSSCG00000039797	0.434376	0.433483
ENSSSCG00000033744	-0.364754	0.433483
ENSSSCG00000013758	-0.38051	0.433531
ENSSSCG00000051458	-0.416474	0.433664
ENSSSCG00000017822	-0.207847	0.433664
ENSSSCG00000050648	-0.435418	0.433664
ENSSSCG00000016692	-0.229147	0.433664
ENSSSCG00000011933	0.254666	0.433773
ENSSSCG00000009943	-0.303619	0.434223
ENSSSCG00000009087	-0.450045	0.434223
ENSSSCG00000036569	-0.433711	0.434287
ENSSSCG00000029257	0.373523	0.434414
ENSSSCG00000037803	0.278363	0.435591
ENSSSCG00000026772	-0.269141	0.435591
ENSSSCG00000005191	0.251841	0.437383
ENSSSCG00000034318	-0.269527	0.437383
ENSSSCG00000040109	0.367393	0.437383
ENSSSCG00000013299	0.363204	0.437383
ENSSSCG00000048872	0.45369	0.437809
ENSSSCG00000038007	0.446039	0.438608
ENSSSCG00000021862	0.249425	0.438808
ENSSSCG00000005678	-0.408387	0.438808
ENSSSCG00000024867	-0.454565	0.438967
ENSSSCG00000000066	-0.312248	0.438967
ENSSSCG00000011978	0.376277	0.43901
ENSSSCG00000010451	-0.455691	0.43901
ENSSSCG00000015545	0.282731	0.43901
ENSSSCG00000014766	0.440584	0.43901
ENSSSCG00000014989	0.259749	0.43901
ENSSSCG00000018061	-0.454197	0.43901
ENSSSCG00000010464	0.453565	0.439612
ENSSSCG00000049314	-0.408098	0.439612
ENSSSCG00000005221	0.453385	0.43971
ENSSSCG00000010613	-0.388222	0.43971
ENSSSCG00000035595	0.373047	0.43971
ENSSSCG00000035854	-0.333593	0.43971
ENSSSCG00000025708	-0.434857	0.43971
ENSSSCG00000000522	0.266747	0.43971
ENSSSCG00000040352	-0.441439	0.43971
ENSSSCG00000000611	-0.208196	0.439881
ENSSSCG00000021769	-0.292044	0.440245
ENSSSCG00000035648	0.30972	0.440432
ENSSSCG00000035414	-0.288409	0.440432
ENSSSCG00000000271	0.399383	0.440432
ENSSSCG00000048780	-0.372489	0.441308
ENSSSCG00000003941	-0.353798	0.441308
ENSSSCG00000003265	-0.451865	0.441308
ENSSSCG00000013223	-0.209792	0.441308
ENSSSCG00000009978	0.247471	0.441308
ENSSSCG00000029781	-0.454596	0.441308
ENSSSCG00000015277	0.422077	0.441308
ENSSSCG00000033594	-0.430728	0.441308
ENSSSCG00000024065	-0.22764	0.441308
ENSSSCG00000041346	-0.404018	0.441436
ENSSSCG00000012910	-0.40716	0.442992
ENSSSCG00000048543	-0.435272	0.442992
ENSSSCG00000017514	-0.232476	0.442992
ENSSSCG00000015923	0.339543	0.443095
ENSSSCG00000010186	-0.337188	0.443532
ENSSSCG00000036438	0.443046	0.443883
ENSSSCG00000009477	0.392688	0.444815
ENSSSCG00000003733	0.413537	0.444973
ENSSSCG00000012238	0.419899	0.446872
ENSSSCG00000014177	-0.220271	0.447082
ENSSSCG00000009956	0.178956	0.447082
ENSSSCG00000008374	-0.223447	0.447082
ENSSSCG00000021361	-0.226994	0.447082
ENSSSCG00000014048	-0.282811	0.447219
ENSSSCG00000013895	-0.270386	0.447219
ENSSSCG00000021383	-0.324219	0.447329
ENSSSCG00000050522	0.368355	0.447705
ENSSSCG00000010484	-0.21466	0.447764
ENSSSCG00000033949	-0.329244	0.448523
ENSSSCG00000025564	0.430212	0.448523
ENSSSCG00000014794	-0.280774	0.448523
ENSSSCG00000036275	-0.213969	0.448523
ENSSSCG00000017290	-0.325752	0.448523
ENSSSCG00000016827	-0.281898	0.449053
ENSSSCG00000015383	0.450226	0.449562
ENSSSCG00000023807	0.29505	0.449618
ENSSSCG00000033760	0.443345	0.449972
ENSSSCG00000039054	0.336607	0.450645
ENSSSCG00000031636	-0.18353	0.450645
ENSSSCG00000051727	0.448875	0.450645
ENSSSCG00000041762	-0.420123	0.450645
ENSSSCG00000002660	-0.384868	0.450774
ENSSSCG00000014833	0.385925	0.450774
ENSSSCG00000040042	0.449183	0.450774
ENSSSCG00000024621	0.283945	0.450988
ENSSSCG00000040678	0.358858	0.450988
ENSSSCG00000014031	-0.279467	0.450988
ENSSSCG00000000273	-0.317468	0.451166
ENSSSCG00000022722	-0.406888	0.45133
ENSSSCG00000013302	0.344986	0.45133
ENSSSCG00000030112	0.317581	0.45133
ENSSSCG00000037918	0.414635	0.451462
ENSSSCG00000016073	0.243784	0.451462
ENSSSCG00000008749	0.271414	0.451462
ENSSSCG00000040985	0.412396	0.452082
ENSSSCG00000024152	-0.234887	0.452082
ENSSSCG00000037697	0.439145	0.452552
ENSSSCG00000003998	-0.247476	0.452851
ENSSSCG00000051466	-0.435927	0.453004
ENSSSCG00000012375	-0.384771	0.456241
ENSSSCG00000029169	-0.193054	0.45657
ENSSSCG00000003267	-0.298027	0.45657
ENSSSCG00000046702	-0.433456	0.45657
ENSSSCG00000016277	-0.405859	0.45657
ENSSSCG00000006900	0.352939	0.45657
ENSSSCG00000034031	-0.229734	0.45657
ENSSSCG00000024310	-0.391043	0.45657
ENSSSCG00000037364	-0.434037	0.45657
ENSSSCG00000011705	0.401842	0.456746
ENSSSCG00000002669	0.430946	0.456746
ENSSSCG00000013721	-0.185453	0.456746
ENSSSCG00000010514	-0.391684	0.456982
ENSSSCG00000039045	-0.436223	0.458005
ENSSSCG00000029059	-0.250802	0.458005
ENSSSCG00000016401	-0.44401	0.458005
ENSSSCG00000049985	-0.436971	0.458005
ENSSSCG00000007942	-0.271687	0.458005
ENSSSCG00000010585	0.284478	0.458354
ENSSSCG00000008486	0.345011	0.458354
ENSSSCG00000035120	0.406543	0.458354
ENSSSCG00000003566	-0.342212	0.458426
ENSSSCG00000022675	-0.442853	0.458426
ENSSSCG00000012638	0.439912	0.458426
ENSSSCG00000000405	-0.326612	0.458426
ENSSSCG00000003920	-0.44009	0.459029
ENSSSCG00000034192	-0.401512	0.459029
ENSSSCG00000014176	0.373288	0.459029
ENSSSCG00000009215	-0.271035	0.459029
ENSSSCG00000051619	-0.395615	0.459043
ENSSSCG00000032692	-0.355029	0.459114
ENSSSCG00000041525	-0.435357	0.459736
ENSSSCG00000032332	0.23637	0.459748
ENSSSCG00000009239	-0.370532	0.459748
ENSSSCG00000008349	0.380955	0.459748
ENSSSCG00000025943	0.413285	0.459748
ENSSSCG00000039950	-0.401377	0.459748
ENSSSCG00000030386	-0.213192	0.459748
ENSSSCG00000003230	-0.442169	0.460117
ENSSSCG00000040875	-0.401341	0.460743
ENSSSCG00000015413	0.361224	0.46094
ENSSSCG00000008002	-0.444075	0.461435
ENSSSCG00000008770	0.439097	0.461934
ENSSSCG00000000413	-0.438601	0.462057
ENSSSCG00000004217	0.367552	0.462139
ENSSSCG00000033849	0.284939	0.462522
ENSSSCG00000013637	-0.315664	0.462522
ENSSSCG00000015692	-0.168989	0.462522
ENSSSCG00000015462	-0.278358	0.462522
ENSSSCG00000001503	0.405302	0.462522
ENSSSCG00000001008	0.41722	0.462522
ENSSSCG00000023362	-0.35772	0.462522
ENSSSCG00000008449	-0.408305	0.46452
ENSSSCG00000014538	0.289148	0.46484
ENSSSCG00000025463	0.387062	0.464895
ENSSSCG00000008554	-0.397939	0.464895
ENSSSCG00000006733	-0.257617	0.464895
ENSSSCG00000037734	-0.334511	0.464964
ENSSSCG00000015673	-0.19815	0.464964
ENSSSCG00000009615	-0.438407	0.465084
ENSSSCG00000017879	0.362008	0.465084
ENSSSCG00000005199	0.442266	0.46517
ENSSSCG00000011448	0.342239	0.46517
ENSSSCG00000025921	0.396171	0.46517
ENSSSCG00000003793	0.435995	0.46517
ENSSSCG00000037595	0.236468	0.46517
ENSSSCG00000049333	-0.439889	0.46517
ENSSSCG00000017380	0.438536	0.46517
ENSSSCG00000004963	0.254689	0.465279
ENSSSCG00000011775	0.244466	0.465338
ENSSSCG00000014904	0.367885	0.466016
ENSSSCG00000021053	0.435612	0.466901
ENSSSCG00000009668	-0.31426	0.466901
ENSSSCG00000037351	0.408479	0.466901
ENSSSCG00000017750	0.292149	0.466901
ENSSSCG00000044208	-0.273907	0.466917
ENSSSCG00000003885	-0.34908	0.467008
ENSSSCG00000020711	0.368356	0.467008
ENSSSCG00000041566	0.418181	0.467008
ENSSSCG00000017761	-0.324431	0.467008
ENSSSCG00000045477	0.434939	0.467975
ENSSSCG00000011578	-0.367684	0.468691
ENSSSCG00000033037	-0.340835	0.46907
ENSSSCG00000004388	0.395155	0.469904
ENSSSCG00000031794	0.387735	0.469904
ENSSSCG00000009968	0.320206	0.469904
ENSSSCG00000025598	-0.364787	0.469904
ENSSSCG00000001710	-0.324946	0.469904
ENSSSCG00000017143	-0.411536	0.469904
ENSSSCG00000004244	0.233458	0.470164
ENSSSCG00000047328	-0.356519	0.470398
ENSSSCG00000048507	0.434546	0.470805
ENSSSCG00000035249	0.435822	0.472154
ENSSSCG00000028336	0.259528	0.472154
ENSSSCG00000000811	-0.243086	0.472154
ENSSSCG00000037754	-0.243478	0.472154
ENSSSCG00000004143	0.433235	0.472614
ENSSSCG00000013282	0.33518	0.472614
ENSSSCG00000014223	0.184885	0.472614
ENSSSCG00000006984	0.331325	0.472614
ENSSSCG00000023978	-0.414651	0.472747
ENSSSCG00000011677	-0.254154	0.472795
ENSSSCG00000021669	-0.259369	0.472795
ENSSSCG00000001906	0.437617	0.472819
ENSSSCG00000002135	-0.294535	0.473154
ENSSSCG00000011611	0.438007	0.473432
ENSSSCG00000008396	0.336042	0.473432
ENSSSCG00000039419	-0.435731	0.473432
ENSSSCG00000034722	0.427202	0.473432
ENSSSCG00000004479	0.350478	0.473916
ENSSSCG00000013003	-0.434445	0.474027
ENSSSCG00000025228	0.357458	0.474027
ENSSSCG00000021638	0.393858	0.474027
ENSSSCG00000034495	0.437138	0.474027
ENSSSCG00000035738	0.427189	0.474027
ENSSSCG00000017832	-0.28147	0.474027
ENSSSCG00000009114	-0.424804	0.47471
ENSSSCG00000017753	-0.291238	0.47471
ENSSSCG00000000025	0.256995	0.474926
ENSSSCG00000016941	0.329536	0.47499
ENSSSCG00000027007	-0.32289	0.475219
ENSSSCG00000009896	-0.29506	0.475219
ENSSSCG00000016263	-0.219275	0.475219
ENSSSCG00000023880	-0.312024	0.475219
ENSSSCG00000035671	0.265267	0.475219
ENSSSCG00000013248	0.435326	0.476213
ENSSSCG00000036622	-0.306125	0.476606
ENSSSCG00000001490	0.42274	0.476606
ENSSSCG00000000176	-0.230039	0.476606
ENSSSCG00000004218	0.416524	0.47739
ENSSSCG00000047798	-0.331522	0.47739
ENSSSCG00000014094	-0.210174	0.47739
ENSSSCG00000013335	0.368751	0.47739
ENSSSCG00000050318	-0.358099	0.47739
ENSSSCG00000006369	0.355295	0.47739
ENSSSCG00000031751	-0.434619	0.47739
ENSSSCG00000003894	-0.408373	0.477473
ENSSSCG00000036673	0.336765	0.477473
ENSSSCG00000035571	0.252104	0.477473
ENSSSCG00000028144	0.434496	0.477473
ENSSSCG00000036476	0.214538	0.477473
ENSSSCG00000010456	0.250602	0.477473
ENSSSCG00000032503	0.42812	0.477473
ENSSSCG00000002004	-0.347321	0.477473
ENSSSCG00000027558	-0.431111	0.478087
ENSSSCG00000026733	-0.308206	0.478087
ENSSSCG00000034449	0.282963	0.4782
ENSSSCG00000033694	-0.395765	0.4782
ENSSSCG00000004980	0.269991	0.478743
ENSSSCG00000034474	0.418301	0.478743
ENSSSCG00000038693	-0.400706	0.478743
ENSSSCG00000036693	0.426553	0.478977
ENSSSCG00000029268	0.344924	0.480696
ENSSSCG00000005316	-0.23766	0.481442
ENSSSCG00000043778	0.418256	0.481442
ENSSSCG00000035299	0.430164	0.481442
ENSSSCG00000009061	-0.191429	0.481442
ENSSSCG00000007799	-0.432538	0.481442
ENSSSCG00000006250	0.291074	0.481442
ENSSSCG00000049262	-0.432742	0.481442
ENSSSCG00000025531	0.370591	0.481442
ENSSSCG00000007492	0.338923	0.481442
ENSSSCG00000016567	0.254557	0.481442
ENSSSCG00000040110	-0.420257	0.481564
ENSSSCG00000030217	0.432096	0.482549
ENSSSCG00000020686	-0.224863	0.482637
ENSSSCG00000024125	-0.298145	0.482637
ENSSSCG00000008645	0.221809	0.483133
ENSSSCG00000011047	0.270993	0.483133
ENSSSCG00000035696	-0.377534	0.483758
ENSSSCG00000028996	0.336427	0.483758
ENSSSCG00000002509	-0.239092	0.483758
ENSSSCG00000023041	-0.416496	0.484229
ENSSSCG00000000584	0.431592	0.484959
ENSSSCG00000017058	0.297139	0.484959
ENSSSCG00000004507	0.286791	0.486272
ENSSSCG00000033616	0.396493	0.486559
ENSSSCG00000003797	0.38324	0.486618
ENSSSCG00000005385	-0.359447	0.487796
ENSSSCG00000022163	0.39631	0.487796
ENSSSCG00000023303	0.422261	0.487796
ENSSSCG00000001844	0.427088	0.487796
ENSSSCG00000016878	0.400536	0.487796
ENSSSCG00000017608	0.316149	0.487796
ENSSSCG00000037554	-0.426795	0.487796
ENSSSCG00000004052	-0.389314	0.487925
ENSSSCG00000035362	0.395436	0.487925
ENSSSCG00000029708	-0.302507	0.487925
ENSSSCG00000014184	0.256833	0.487925
ENSSSCG00000027506	-0.302293	0.487925
ENSSSCG00000050465	-0.398515	0.487925
ENSSSCG00000032580	0.292281	0.487925
ENSSSCG00000017947	-0.336539	0.487925
ENSSSCG00000002689	-0.273874	0.488321
ENSSSCG00000013259	-0.214444	0.488321
ENSSSCG00000023760	0.304448	0.489291
ENSSSCG00000016901	0.428217	0.48948
ENSSSCG00000005713	-0.410258	0.489612
ENSSSCG00000023033	-0.380501	0.489612
ENSSSCG00000031793	-0.380049	0.489612
ENSSSCG00000000707	0.411647	0.489612
ENSSSCG00000017693	-0.259702	0.489612
ENSSSCG00000003986	-0.385744	0.489986
ENSSSCG00000032843	0.425828	0.489986
ENSSSCG00000011678	-0.17534	0.490217
ENSSSCG00000006767	0.232937	0.490217
ENSSSCG00000031426	0.288162	0.490442
ENSSSCG00000015781	-0.317539	0.490442
ENSSSCG00000032942	0.219367	0.490442
ENSSSCG00000036328	-0.393138	0.490442
ENSSSCG00000001472	0.313369	0.490484
ENSSSCG00000011959	-0.252965	0.491219
ENSSSCG00000023377	-0.302999	0.491328
ENSSSCG00000041050	-0.415278	0.491328
ENSSSCG00000024389	-0.406512	0.491985
ENSSSCG00000011104	-0.221079	0.492349
ENSSSCG00000009972	-0.371549	0.49255
ENSSSCG00000010334	-0.427265	0.49351
ENSSSCG00000028561	-0.350574	0.494061
ENSSSCG00000000059	-0.327149	0.494524
ENSSSCG00000030016	-0.384969	0.495094
ENSSSCG00000030048	0.426353	0.495094
ENSSSCG00000036909	-0.32409	0.495094
ENSSSCG00000002457	-0.237147	0.495537
ENSSSCG00000002879	-0.255264	0.497073
ENSSSCG00000035940	-0.320665	0.497073
ENSSSCG00000003831	0.297236	0.497073
ENSSSCG00000009578	-0.420321	0.497073
ENSSSCG00000029375	-0.336994	0.497073
ENSSSCG00000038526	-0.346602	0.497073
ENSSSCG00000002815	0.354027	0.498174
ENSSSCG00000035592	-0.422598	0.498174
ENSSSCG00000032777	-0.4235	0.498174
ENSSSCG00000000998	-0.307299	0.498174
ENSSSCG00000009887	-0.197094	0.498295
ENSSSCG00000003905	-0.330419	0.498452
ENSSSCG00000043396	0.406183	0.498459
ENSSSCG00000001456	0.314939	0.498459
ENSSSCG00000036947	-0.248684	0.498461
ENSSSCG00000006237	0.356657	0.499426
ENSSSCG00000006642	0.368312	0.500617
ENSSSCG00000017818	0.350127	0.500816
ENSSSCG00000002690	-0.232319	0.50149
ENSSSCG00000033329	0.423997	0.501643
ENSSSCG00000004653	0.229481	0.501679
ENSSSCG00000023818	-0.191262	0.501679
ENSSSCG00000046495	0.396725	0.502106
ENSSSCG00000034378	-0.207031	0.502686
ENSSSCG00000013662	-0.303856	0.502686
ENSSSCG00000015238	0.280984	0.502686
ENSSSCG00000007817	-0.258422	0.503285
ENSSSCG00000022575	0.350439	0.503285
ENSSSCG00000045936	0.359317	0.503297
ENSSSCG00000004253	-0.155647	0.503297
ENSSSCG00000002716	-0.380373	0.503297
ENSSSCG00000036446	0.410513	0.503297
ENSSSCG00000008535	-0.26859	0.503297
ENSSSCG00000011301	-0.204282	0.50376
ENSSSCG00000012913	-0.342256	0.504055
ENSSSCG00000045200	-0.320181	0.5041
ENSSSCG00000017256	0.416068	0.5041
ENSSSCG00000008207	0.337658	0.504111
ENSSSCG00000033937	0.355884	0.504383
ENSSSCG00000003278	0.406869	0.505069
ENSSSCG00000009601	0.416898	0.505069
ENSSSCG00000049172	0.410295	0.505069
ENSSSCG00000049691	0.263322	0.505069
ENSSSCG00000049616	-0.407911	0.505069
ENSSSCG00000040945	0.346335	0.505069
ENSSSCG00000018672	-0.407143	0.506044
ENSSSCG00000033155	0.182152	0.506044
ENSSSCG00000009197	-0.421626	0.506044
ENSSSCG00000017024	0.362874	0.506044
ENSSSCG00000001800	-0.405742	0.507087
ENSSSCG00000025842	-0.347434	0.507422
ENSSSCG00000001984	-0.234652	0.507507
ENSSSCG00000002506	-0.245062	0.508141
ENSSSCG00000010076	0.40279	0.508273
ENSSSCG00000048796	-0.420779	0.508273
ENSSSCG00000029119	-0.302178	0.508273
ENSSSCG00000006862	0.29886	0.508312
ENSSSCG00000046655	-0.388578	0.508371
ENSSSCG00000008240	0.417726	0.508443
ENSSSCG00000047754	0.417733	0.508628
ENSSSCG00000004520	0.382107	0.509082
ENSSSCG00000011434	-0.310762	0.509444
ENSSSCG00000009237	-0.276601	0.509691
ENSSSCG00000045353	-0.394715	0.509728
ENSSSCG00000000985	-0.173152	0.509728
ENSSSCG00000000703	-0.366992	0.509728
ENSSSCG00000005122	0.325377	0.510531
ENSSSCG00000034444	0.297263	0.510531
ENSSSCG00000007826	-0.242894	0.51066
ENSSSCG00000006038	0.256752	0.51066
ENSSSCG00000044001	0.354816	0.510735
ENSSSCG00000003825	0.310351	0.512055
ENSSSCG00000000600	0.331475	0.512315
ENSSSCG00000002893	0.36415	0.513022
ENSSSCG00000025488	-0.320307	0.513371
ENSSSCG00000017237	0.374511	0.513519
ENSSSCG00000013760	-0.395542	0.51394
ENSSSCG00000037900	0.373227	0.51394
ENSSSCG00000030017	-0.368519	0.51394
ENSSSCG00000047973	-0.416983	0.51394
ENSSSCG00000022865	0.413232	0.51394
ENSSSCG00000000607	0.360758	0.514072
ENSSSCG00000034978	-0.395354	0.514072
ENSSSCG00000027890	0.36534	0.5144
ENSSSCG00000003324	0.398918	0.514537
ENSSSCG00000043781	0.355888	0.514537
ENSSSCG00000005389	-0.272425	0.51484
ENSSSCG00000009828	0.275389	0.514847
ENSSSCG00000031835	-0.392715	0.515385
ENSSSCG00000005904	-0.331477	0.515385
ENSSSCG00000012730	0.400897	0.515385
ENSSSCG00000016855	-0.25628	0.515385
ENSSSCG00000032612	0.303196	0.515416
ENSSSCG00000040715	0.387386	0.515446
ENSSSCG00000012278	0.293299	0.515446
ENSSSCG00000001836	0.413247	0.515446
ENSSSCG00000051261	-0.395883	0.51552
ENSSSCG00000000274	-0.174262	0.51552
ENSSSCG00000000807	-0.27749	0.51552
ENSSSCG00000010566	-0.228248	0.515586
ENSSSCG00000005480	-0.218005	0.516247
ENSSSCG00000011768	0.385817	0.516506
ENSSSCG00000007098	-0.242376	0.516506
ENSSSCG00000025856	0.310389	0.516506
ENSSSCG00000035152	0.320294	0.516539
ENSSSCG00000004404	0.400787	0.51682
ENSSSCG00000004744	-0.403109	0.51682
ENSSSCG00000022726	-0.411574	0.51682
ENSSSCG00000025631	-0.216999	0.51682
ENSSSCG00000014387	-0.246796	0.51682
ENSSSCG00000013788	0.290338	0.51682
ENSSSCG00000039731	-0.364091	0.51682
ENSSSCG00000013633	-0.309676	0.51682
ENSSSCG00000010448	-0.266146	0.51682
ENSSSCG00000040445	0.32767	0.51682
ENSSSCG00000015638	0.382446	0.51682
ENSSSCG00000026680	0.384666	0.51682
ENSSSCG00000046153	-0.406329	0.51682
ENSSSCG00000000175	-0.415587	0.51682
ENSSSCG00000010878	0.267073	0.51682
ENSSSCG00000007344	0.341392	0.51682
ENSSSCG00000003762	0.35257	0.517163
ENSSSCG00000009914	-0.297531	0.517163
ENSSSCG00000027091	0.403966	0.517163
ENSSSCG00000019194	-0.414919	0.517163
ENSSSCG00000004191	0.360611	0.517583
ENSSSCG00000005126	-0.195942	0.517931
ENSSSCG00000014411	-0.221889	0.518374
ENSSSCG00000042465	-0.397872	0.518374
ENSSSCG00000017919	0.406976	0.518374
ENSSSCG00000016734	-0.206275	0.518374
ENSSSCG00000012118	0.3275	0.518535
ENSSSCG00000017184	-0.311044	0.518945
ENSSSCG00000050966	-0.244811	0.519349
ENSSSCG00000013236	0.401921	0.519349
[truncated: 29,909 more rows]
